# Supplementary material for: Skin Mycobiota of the Captive Giant Panda (Ailuropoda melanoleuca) and the Distribution of Opportunistic Dermatomycosis-Associated Fungi in Different Seasons
Source: Front Vet Sci. 2021 Nov 4;8:708077. doi: 10.3389/fvets.2021.708077 (PMC8599956; doi:10.3389/fvets.2021.708077)
Supplement: Supplementary Table 2 — The relative abundance of each OTU in each sample. [file Table_2.XLS]

#OTU_num	Sp1	Sp2	Sp3	Sp4	Sp5	Sp6	Sp7	Sp8	Sp9	Su1	Su2	Su3	Su4	Su5	Su6	Su7	Su8	Su9	Au1	Au2	Au3	Au4	Au5	Au6	Au7	Au8	Au9	W1	W2	W3	W4	W5	W6	W7	W8	W9	taxonomy
OTU_1	0.0129085535465925	0.0571323018080668	0.0785161682892907	0.0141907162726008	0.0812760778859527	0.122240090403338	0.0497870305980529	0.1560109527121	0.037269645340751	0.0342706884561891	0.0631519471488178	0.197170549374131	0.0294462795549374	0.0168419680111266	0.183175417246175	0.0607614742698192	0.23865611961057	0.669288942976356	0.648991655076495	0.486765472878999	0.0564368915159944	0.0311848052851182	0.0528729137691238	0.0535683240611961	0.0378346662030598	0.0637604311543811	0.0235135605006954	0.0722574756606398	0.0707797287899861	0.0191237830319889	0.561087447844228	0.0375956189151599	0.0415073018080668	0.0489829624478442	0.226595097357441	0.035509388038943	k__Chloroplastida;p__Streptophyta;c__Liliopsida;o__Magnoliophyta;f__unidentified
OTU_2	0.000412899860917942	0.000391168289290681	0.000391168289290681	0.000499826147426982	0.000412899860917942	0.000434631432545202	0.0001086578581363	0.000282510431154381	0.000325973574408901	0.000152121001390821	0.000173852573018081	0	0	0	2.17315716272601e-05	6.51947148817803e-05	4.34631432545202e-05	2.17315716272601e-05	2.17315716272601e-05	6.51947148817803e-05	0	0	0	4.34631432545202e-05	2.17315716272601e-05	0	2.17315716272601e-05	6.51947148817803e-05	0.000239047287899861	6.51947148817803e-05	0.000152121001390821	0.000325973574408901	0.000217315716272601	0.0001086578581363	0.0001086578581363	0.000195584144645341	k__Fungi;p__Basidiomycota;c__Tremellomycetidae;o__Cystofilobasidiales;f__Cystofilobasidiaceae;g__Guehomyces;s__Guehomyces_pullulans
OTU_3	2.17315716272601e-05	0.000195584144645341	0	2.17315716272601e-05	6.51947148817803e-05	4.34631432545202e-05	8.69262865090403e-05	0	4.34631432545202e-05	0.000304242002781641	0.000304242002781641	2.17315716272601e-05	0.000239047287899861	0.000195584144645341	0	0.000282510431154381	0.000130389429763561	8.69262865090403e-05	0.0001086578581363	0.000173852573018081	0.000130389429763561	0.000152121001390821	0.000195584144645341	0.0001086578581363	0.000130389429763561	0.000152121001390821	0.000152121001390821	0.000195584144645341	0.000369436717663421	0.000890994436717663	0.000239047287899861	0.000760605006954103	0.000282510431154381	0.000478094575799722	8.69262865090403e-05	0.000260778859527121	k__Fungi;p__Basidiomycota;c__Tremellomycetidae;o__Tremellales;f__unidentified;g__Trichosporon
OTU_4	0.0436587273991655	0.0124739221140473	0.0158423157162726	0.0199278511821975	0.025817107093185	0.0208405771905424	0.039942628650904	0.0448322322670376	0.0238178025034771	0.0272731223922114	0.0353789986091794	0.0307936369958275	0.0263821279554937	0.0612178372739917	0.045788421418637	0.0780598052851182	0.0510257301808067	0.0132562586926287	0.0149730528511822	0.0140820584144645	0.0365742350486787	0.0397035813630042	0.0193193671766342	0.0319236787204451	0.0370523296244784	0.0395079972183588	0.0346835883171071	0.0247957232267038	0.0295984005563282	0.00734527121001391	0.00688890820584145	0.0131476008344924	0.0119306328233658	0.00734527121001391	0.0169506258692629	0.0139082058414465	k__Fungi;p__Ascomycota;c__Dothideomycetes;o__Pleosporales;f__unidentified;g__unidentified;s__Microsphaeropsis_olivacea
OTU_5	0.0347053198887344	0.0214490611961057	0.0346618567454798	0.023643949930459	0.0396601182197497	0.0474834840055633	0.0551112656467316	0.0638908205841447	0.0315759735744089	0.0729746175243394	0.0578059805285118	0.0627173157162726	0.0447235744089013	0.0496783727399166	0.0451799374130737	0.0527859874826147	0.0910118219749652	0.0223183240611961	0.0198626564673157	0.0257736439499305	0.0866003129346314	0.211035292072323	0.0575886648122392	0.0813195410292072	0.0711491655076495	0.111048331015299	0.0610439847009736	0.0954015994436718	0.141472531293463	0.0215142559109875	0.0468098052851182	0.0297070584144645	0.0445714534075104	0.0363351877607789	0.073778685674548	0.0799069888734353	k__Fungi;p__Ascomycota;c__Dothideomycetes;o__Pleosporales
OTU_6	0.00623696105702364	0.0686283031988873	0.00521557719054242	0.0278164116828929	0.00791029207232267	0.0334883518776078	0.0219488873435327	0.00817107093184979	0.0047374826147427	0.0184718358831711	0.022144471488178	0.00404207232267038	0.017298331015299	0.0358136300417246	0.0206449930458971	0.0521557719054242	0.0168419680111266	0.0212100139082058	0.00204276773296245	0.0200147774687065	0.00341185674547983	0.00854050764951321	0.00336839360222531	0.00680198191933241	0.0280554589707928	0.00297722531293463	0.0220140820584145	0.0320757997218359	0.0326842837273992	0.427829450625869	0.02038421418637	0.150360744089013	0.0397035813630042	0.291768080667594	0.00743219749652295	0.0297939847009736	k__Fungi;p__Basidiomycota;c__Tremellomycetidae;o__Tremellales;f__unidentified
OTU_7	0.0207101877607789	0.015038247566064	0.0255128650904033	0.0114308066759388	0.0290551112656467	0.0282510431154381	0.0333144993045897	0.0160596314325452	0.0259257649513213	0.0467663421418637	0.0274469749652295	0.0625434631432545	0.0582188803894298	0.0337056675938804	0.0249695757997218	0.0219271557719054	0.0346401251738526	0.0123435326842837	0.037095792767733	0.0173852573018081	0.0126695062586926	0.028490090403338	0.0222313977746871	0.0276208275382476	0.0256649860917942	0.0311196105702364	0.0284466272600834	0.0734744436717663	0.0543289290681502	0.0118437065368567	0.0208623087621697	0.0156032684283727	0.0212534770514604	0.0140820584144645	0.0572192280945758	0.0261430806675939	k__Fungi;p__Ascomycota;c__Eurotiomycetes;o__Chaetothyriales;f__Herpotrichiellaceae;g__unidentified;s__Knufia_chersonesos
OTU_8	0.0225139082058414	0.0503737830319889	0.017885083449235	0.0199278511821975	0.0691715924895688	0.0346835883171071	0.03600921418637	0.0348357093184979	0.027490438108484	0.0685848400556328	0.0145601529902643	0.0299026425591099	0.0389647079276773	0.0533292767732962	0.0413769123783032	0.04370219054242	0.037095792767733	0.0120610222531293	0.00982267037552156	0.00721488178025035	0.0277729485396384	0.0569801808066759	0.0237960709318498	0.0391820236439499	0.0449843532684284	0.0328798678720445	0.0545027816411683	0.0121479485396384	0.014451495132128	0.00817107093184979	0.00651947148817802	0.00940977051460362	0.010778859527121	0.00565020862308762	0.0100399860917942	0.0114525382475661	k__Fungi;p__Ascomycota;c__Dothideomycetes;o__Capnodiales;f__Davidiellaceae;g__Davidiella;s__Davidiella_tassiana
OTU_9	0.184435848400556	0.000673678720445063	0.00402034075104312	0.13317107093185	0.00199930458970793	0.000977920723226704	0.00186891515994437	0.000325973574408901	0.00132562586926287	0.000217315716272601	0.000195584144645341	0.000412899860917942	0.00180372044506259	0.000456363004172462	0.000434631432545202	0.00173852573018081	0.00139082058414465	0.000391168289290681	0.000282510431154381	0.0206884561891516	0.000173852573018081	8.69262865090403e-05	0.000347705146036161	0.000608484005563282	0.000173852573018081	0.000456363004172462	0.000999652294853964	0.000152121001390821	0.00128216272600834	0.000260778859527121	0.000325973574408901	0.00173852573018081	0.110222531293463	0.000217315716272601	0.000608484005563282	0.000195584144645341	k__Fungi;p__Ascomycota
OTU_10	0.000869262865090403	0.00139082058414465	0.00310761474269819	0.000717141863699583	0.000869262865090403	0.00467228789986092	0.00136908901251739	0.000347705146036161	0.00467228789986092	0.00488960361613352	0.00330319888734353	0.000760605006954103	0.00128216272600834	0.0104963490959666	0.0282293115438108	0.00152121001390821	0.00149947844228095	0.00417246175243394	0.000369436717663421	0.00638908205841446	0.00940977051460362	0.00393341446453407	0.00938803894297636	0.0133214534075104	0.0132779902642559	0.0430719749652295	0.0222313977746871	0.000760605006954103	0.000717141863699583	0.000847531293463143	0.00173852573018081	0.000412899860917942	0.00182545201668985	0.00354224617524339	0.000282510431154381	0.000304242002781641	k__Chloroplastida;p__Streptophyta;c__Embryophyta;o__Malpighiales;f__unidentified
OTU_11	0.00208623087621697	0.205211230876217	0.0770601529902643	0.00156467315716273	0.0310761474269819	0.00260778859527121	0.0111482962447844	0.0053894297635605	0.0056067454798331	0.00612830319888734	0.00406380389429764	0.00510691933240612	0.0099095966620306	0.0108440542420028	0.00628042420027816	0.00228181502086231	0.00139082058414465	0.000869262865090403	0.0135822322670376	0.000434631432545202	0.000347705146036161	0.00176025730180807	0.00126043115438108	0.0103876912378303	0.00278164116828929	0.00202103616133519	0.00299895688456189	0.0234483657858136	0.0601095271210014	0.0691498609179416	0.0240133866481224	0.0180806675938804	0.00556328233657858	0.0054980876216968	0.00801894993045897	0.00725834492350487	k__Animalia;p__unidentified;c__Mammalia;o__unidentified;f__unidentified;g__unidentified;s__unidentified
OTU_12	0.0106702016689847	0.00995305980528512	0.0160596314325452	0.0604789638386648	0.00591098748261474	0.00628042420027816	0.00660639777468707	0.00964881780250348	0.0141037899860918	0.0054980876216968	0.0191237830319889	0.00706276077885953	0.0487873783031989	0.214534075104312	0.0061500347705146	0.0135605006954103	0.0140820584144645	0.00449843532684284	0.00117350486787204	0.00347705146036161	0.00275990959666203	0.00275990959666203	0.0098009388038943	0.00764951321279555	0.0113438803894298	0.00406380389429764	0.00673678720445063	0.0123435326842837	0.0118871696801113	0.00378129346314325	0.00217315716272601	0.00445497218358832	0.00130389429763561	0.001086578581363	0.00932284422809458	0.00169506258692629	k__Chloroplastida;p__unidentified;c__unidentified;o__Klebsormidiales;f__unidentified;g__Klebsormidium;s__Klebsormidium_flaccidum
OTU_13	0.00869262865090403	0.00897513908205841	0.00897513908205841	0.00591098748261474	0.0199278511821975	0.0376173504867872	0.010192107093185	0.00343358831710709	0.0325756258692629	0.0322713838664812	0.0180154728789986	0.0570019123783032	0.019884388038943	0.0119306328233658	0.014538421418637	0.00747566063977747	0.0143428372739917	0.00701929763560501	0.00284683588317107	0.00701929763560501	0.00254259388038943	0.00519384561891516	0.0064760083449235	0.00432458275382476	0.00808414464534075	0.0101269123783032	0.00280337273991655	0.0252086230876217	0.0321627260083449	0.00784509735744089	0.0251651599443672	0.0132562586926287	0.0138647426981919	0.0217967663421419	0.0984440194714882	0.0169288942976356	k__Fungi;p__Ascomycota;c__Dothideomycetes;o__Capnodiales
OTU_14	0.00467228789986092	0.0057154033379694	0.0044115090403338	0.00782336578581363	0.00541116133518776	0.00751912378303199	0.00475921418636996	0.0141907162726008	0.0129954798331015	0.013951668984701	0.00854050764951321	0.00714968706536857	0.0116481223922114	0.0122348748261474	0.0128216272600834	0.0145166898470097	0.0110613699582754	0.00358570931849791	0.00869262865090403	0.00601964534075104	0.108375347705146	0.0144949582753825	0.0128433588317107	0.0145601529902643	0.0293810848400556	0.0180589360222531	0.0574582753824757	0.00845358136300417	0.00558501390820584	0.00267298331015299	0.00699756606397775	0.0064760083449235	0.00436804589707928	0.00306415159944367	0.00899687065368567	0.00667159248956885	k__Fungi;p__Ascomycota;c__Sordariomycetes
OTU_15	0.000195584144645341	0.000152121001390821	0.0001086578581363	0.000195584144645341	0.000325973574408901	0.000173852573018081	0.000282510431154381	0.000130389429763561	0.000347705146036161	0.000217315716272601	0.000195584144645341	0.000412899860917942	0.000304242002781641	0.0001086578581363	0.000217315716272601	0.000130389429763561	0.000217315716272601	0.0001086578581363	0.000195584144645341	6.51947148817803e-05	0.000347705146036161	0.000412899860917942	0.000195584144645341	0.000239047287899861	0.000347705146036161	0.000565020862308762	0.000282510431154381	0.000717141863699583	0.000695410292072323	0.000130389429763561	0.000325973574408901	0.000325973574408901	0.000347705146036161	0.000195584144645341	0.000304242002781641	0.000325973574408901	k__Chloroplastida;p__Chlorophyta;c__Trebouxiophyceae;o__unidentified;f__unidentified;g__uncultured;s__uncultured_Apatococcus
OTU_16	0.0120175591098748	0.00534596662030598	0.17433066759388	0.00693237134909597	0.0138430111265647	0.0049547983310153	0.00515038247566064	0.00139082058414465	0.00330319888734353	0.00871436022253129	0.000521557719054242	0.00532423504867872	0.00306415159944367	0.00519384561891516	0.00780163421418637	0.00158640472878999	0.00204276773296245	0.000478094575799722	0.000325973574408901	0.000434631432545202	0.0220358136300417	0.00241220445062587	0.0440933588317107	0.0100834492350487	0.00684544506258693	0.025230354659249	0.00436804589707928	0.00638908205841446	0.00617176634214186	0.00156467315716273	0.00669332406119611	0.00184718358831711	0.00306415159944367	0.000673678720445063	0.00632388734353268	0.00273817802503477	k__Chloroplastida;p__Chlorophyta;c__Trebouxiophyceae;o__unidentified;f__unidentified
OTU_17	0.0262734700973574	0.00886648122392211	0.0354876564673157	0.0575234700973574	0.00923591794158553	0.00930111265646732	0.00597618219749652	0.00608484005563282	0.0141255215577191	0.00406380389429764	0.0640212100139082	0.00884474965229485	0.0125825799721836	0.0147122739916551	0.0121914116828929	0.025904033379694	0.00988786509040334	0.00312934631432545	0.000782336578581363	0.00291203059805285	0.00543289290681502	0.00445497218358832	0.0138864742698192	0.00788856050069541	0.00708449235048679	0.011365611961057	0.0103007649513213	0.00819280250347705	0.0116698539638387	0.0043028511821975	0.00673678720445063	0.00849704450625869	0.0046288247566064	0.00239047287899861	0.00699756606397775	0.00793202364394993	k__Chloroplastida;p__Chlorophyta;c__Chlorophyceae;o__unidentified;f__unidentified;g__unidentified;s__uncultured_Scenedesmaceae
OTU_18	0.019297635605007	0.00808414464534075	0.0113438803894298	0.0251868915159944	0.0642385257301808	0.037269645340751	0.013451842837274	0.013364916550765	0.0101051808066759	0.00352051460361613	0.00247739916550765	0.00167333101529903	0.00291203059805285	0.000456363004172462	0.00141255215577191	0.00575886648122392	0.0049547983310153	0.00239047287899861	0.000565020862308762	0.00160813630041725	0.000195584144645341	6.51947148817803e-05	0.000391168289290681	0.00123869958275382	0.000304242002781641	0.00160813630041725	0.00306415159944367	0.00117350486787204	0.00565020862308762	0.00236874130737135	0.00247739916550765	0.00784509735744089	0.0151469054242003	0.00730180806675939	0.00849704450625869	0.0296418636995828	k__Fungi;p__Basidiomycota;c__Tremellomycetidae;o__Cystofilobasidiales;f__Cystofilobasidiaceae;g__Cystofilobasidium;s__Cystofilobasidium_infirmominiatum
OTU_19	0.00708449235048679	0.00501999304589708	0.0054980876216968	0.00632388734353268	0.00856223922114047	0.00654120305980529	0.01879780945758	0.0135170375521558	0.00788856050069541	0.0128433588317107	0.0126043115438108	0.0200582406119611	0.0138212795549374	0.00960535465924896	0.0116481223922114	0.0102138386648122	0.0162552155771905	0.0047374826147427	0.00469401947148818	0.00547635605006954	0.00645427677329624	0.0129085535465925	0.0117567802503477	0.00799721835883171	0.00999652294853964	0.0115611961057024	0.0146688108484006	0.0174721835883171	0.015625	0.0056067454798331	0.00669332406119611	0.00827972878998609	0.00893167593880389	0.0057154033379694	0.0141037899860918	0.0103224965229485	k__Fungi;p__Ascomycota;c__Eurotiomycetes;o__Chaetothyriales;f__Herpotrichiellaceae
OTU_20	0.00208623087621697	0.000999652294853964	0.000847531293463143	0.00123869958275382	0.00145601529902643	0.00195584144645341	0.000586752433936022	0.00258605702364395	0.00180372044506259	0.00923591794158553	0.00312934631432545	0.0154946105702364	0.0051721140472879	0.00578059805285118	0.0410944019471488	0.00543289290681502	0.00949669680111266	0.00186891515994437	0.00893167593880389	0.00215142559109875	0.119610570236439	0.0161030945757997	0.00575886648122392	0.00886648122392211	0.00486787204450626	0.00723661335187761	0.00299895688456189	0.00304242002781641	0.00191237830319889	0.000456363004172462	0.00121696801112656	0.000825799721835883	0.000847531293463143	0.000608484005563282	0.00306415159944367	0.000738873435326843	k__Fungi;p__Ascomycota;c__Sordariomycetes;o__Glomerellales;f__Glomerellaceae
OTU_21	0.00310761474269819	0.00493306675938804	0.00578059805285118	0.00165159944367177	0.00299895688456189	0.00541116133518776	0.0174504520166898	0.0664334144645341	0.00864916550764951	0.0204059457579972	0.000760605006954103	0.00519384561891516	0.00169506258692629	0.00323800417246175	0.00141255215577191	0.00130389429763561	0.00132562586926287	0.00152121001390821	0.00102138386648122	0.00167333101529903	0.00710622392211405	0.00399860917941586	0.0403989916550765	0.00373783031988873	0.0123435326842837	0.00597618219749652	0.00247739916550765	0.00771470792767733	0.00443324061196106	0.00149947844228095	0.00186891515994437	0.00232527816411683	0.00723661335187761	0.00232527816411683	0.00282510431154381	0.0226877607788595	k__Chloroplastida;p__Streptophyta;c__Embryophyta;o__Rosales;f__unidentified
OTU_22	4.34631432545202e-05	0.0001086578581363	8.69262865090403e-05	0.00256432545201669	0.000347705146036161	0.000239047287899861	0.000912726008344923	0.000195584144645341	0.00256432545201669	0.00102138386648122	0.000347705146036161	0.0001086578581363	0.000217315716272601	0.000130389429763561	8.69262865090403e-05	0.0149730528511822	0.00191237830319889	0.000260778859527121	0.000130389429763561	0.000412899860917942	0.078211926286509	0.000369436717663421	0.000543289290681502	0.000195584144645341	0.00115177329624478	0.000478094575799722	0.00113004172461752	0.0001086578581363	0.000195584144645341	0.000325973574408901	4.34631432545202e-05	0.000521557719054242	0.0307719054242003	0.000304242002781641	0.00141255215577191	0.000239047287899861	Unclassified
OTU_23	0.00899687065368567	0.00399860917941586	0.00817107093184979	0.00817107093184979	0.00801894993045897	0.00643254520166898	0.0171679415855355	0.018884735744089	0.00634561891515994	0.000956189151599444	0.00167333101529903	0.00173852573018081	0.00312934631432545	0.00147774687065369	0.00456363004172462	0.00423765646731572	0.00801894993045897	0.000912726008344923	0.000369436717663421	0.000977920723226704	0.00523730876216968	0.0116481223922114	0.0127129694019471	0.0181023991655077	0.00436804589707928	0.00906206536856746	0.00977920723226704	0.00877955493741307	0.00584579276773296	0.000956189151599444	0.00195584144645341	0.00334666203059805	0.00249913073713491	0.000977920723226704	0.00521557719054242	0.00525904033379694	k__Chloroplastida;p__Chlorophyta;c__Trebouxiophyceae;o__unidentified;f__unidentified;g__Chlorella;s__Chloroidium_ellipsoideum
OTU_24	0.00197757301808067	0.00221662030598053	0.00345531988873435	0.00239047287899861	0.0820584144645341	0.0197974617524339	0.00360744089012517	0.0046288247566064	0.01086578581363	0.000608484005563282	0.00143428372739917	0.00115177329624478	0.00113004172461752	0.00212969401947149	0.00258605702364395	0.00173852573018081	0.00317280945757997	0.000847531293463143	0.000282510431154381	0.000890994436717663	0.000173852573018081	0.000195584144645341	0.00223835187760779	0.00113004172461752	0.000630215577190542	0.000934457579972184	0.00895340751043115	0.0292072322670376	0.0040855354659249	0.000934457579972184	0.00415073018080668	0.00951842837273992	0.00304242002781641	0.00180372044506259	0.00121696801112656	0.000412899860917942	k__Chloroplastida;p__Streptophyta;c__Embryophyta;o__Apiales;f__unidentified;g__unidentified;s__Apium_graveolens
OTU_25	0.0147992002781641	0.00291203059805285	0.00940977051460362	0.0173635257301808	0.0145166898470097	0.0191889777468707	0.0134083796940195	0.010192107093185	0.0114960013908206	0.00801894993045897	0.00149947844228095	0.00256432545201669	0.00280337273991655	0.000608484005563282	0.00391168289290681	0.00717141863699583	0.00373783031988873	0.00169506258692629	0.00117350486787204	0.00193410987482615	0.00141255215577191	0.000369436717663421	0.00130389429763561	0.00126043115438108	0.000173852573018081	0.00256432545201669	0.00328146731571627	0.00438977746870654	0.00510691933240612	0.0011952364394993	0.00282510431154381	0.00704102920723227	0.0154076842837274	0.00478094575799722	0.00756258692628651	0.00714968706536857	k__Fungi;p__Basidiomycota;c__unidentified;o__Leucosporidiales;f__Leucosporidiaceae;g__Leucosporidium;s__Leucosporidium_scottii
OTU_26	0.00567194019471488	0.0181458623087622	0.00289029902642559	0.00601964534075104	0.0126695062586926	0.0284031641168289	0.000630215577190542	0.00312934631432545	0.00530250347705146	0.00845358136300417	0.00786682892906815	0.00388995132127956	0.00817107093184979	0.00651947148817802	0.00884474965229485	0.00471575104311544	0.0315977051460362	0.00256432545201669	0.0644993045897079	0.00438977746870654	0.000304242002781641	0.00186891515994437	0.000239047287899861	0.00651947148817802	0.00143428372739917	0.000804068150208623	0.000499826147426982	0.00169506258692629	0.00210796244784423	0.000804068150208623	0.000760605006954103	0.000999652294853964	0.00236874130737135	0.00121696801112656	0.000369436717663421	0.00328146731571627	k__Fungi;p__Ascomycota;c__Sordariomycetes
OTU_27	0.000630215577190542	0.000565020862308762	0.000478094575799722	0.000521557719054242	0.000347705146036161	0.000543289290681502	0.00110831015299026	0.000369436717663421	0.000217315716272601	0.005932719054242	0.00791029207232267	0.0141472531293463	0.01721140472879	0.011952364394993	0.00890994436717663	0.015711926286509	0.00784509735744089	0.00521557719054242	0.00654120305980529	0.00591098748261474	0.0214273296244784	0.0294897426981919	0.000608484005563282	0.000239047287899861	0.000217315716272601	0.000282510431154381	0.000412899860917942	0.000152121001390821	6.51947148817803e-05	2.17315716272601e-05	6.51947148817803e-05	2.17315716272601e-05	4.34631432545202e-05	8.69262865090403e-05	0.000282510431154381	4.34631432545202e-05	k__Stramenopiles;p__unidentified;c__Chrysophyceae;o__Chromulinales;f__unidentified;g__Spumella
OTU_28	0.00284683588317107	0.00145601529902643	0.000999652294853964	0.000586752433936022	0.00178198887343533	0.000630215577190542	0.000239047287899861	0.000282510431154381	0.00245566759388039	0.00184718358831711	0.00215142559109875	0.000977920723226704	0.00299895688456189	0.00145601529902643	0.00126043115438108	0.000543289290681502	0.000847531293463143	0.000434631432545202	0.000369436717663421	0.000651947148817803	0.0170158205841446	0.0302068845618915	0.0109309805285118	0.0327277468706537	0.00656293463143255	0.00493306675938804	0.00341185674547983	0.000630215577190542	0.00234700973574409	0.00369436717663421	0.00139082058414465	0.000478094575799722	0.00291203059805285	0.000369436717663421	0.000304242002781641	0.000565020862308762	k__Fungi;p__Ascomycota;c__Saccharomycetes;o__Saccharomycetales;f__Saccharomycetaceae;g__Debaryomyces;s__uncultured_eukaryote
OTU_29	0.000304242002781641	0.000456363004172462	0.000173852573018081	8.69262865090403e-05	0.00158640472878999	0.000565020862308762	0.000369436717663421	0.000804068150208623	0.000217315716272601	0.051721140472879	0.00682371349095967	0.000195584144645341	0.000304242002781641	0.000478094575799722	8.69262865090403e-05	0.000195584144645341	0.00154294158553547	0.000412899860917942	0.000890994436717663	0.000825799721835883	0.000956189151599444	8.69262865090403e-05	0.000239047287899861	0.000304242002781641	0.000521557719054242	0.000325973574408901	0.000130389429763561	0.0127564325452017	0.00654120305980529	0.0232093184979138	0.00367263560500695	0.00221662030598053	0.0526555980528512	0.00856223922114047	0.00860570236439499	0.0625434631432545	k__Chloroplastida;p__Streptophyta;c__Embryophyta;o__Magnoliophyta;f__unidentified;g__unidentified;s__Citrus_sinensis
OTU_30	0.00262952016689847	0.00365090403337969	0.00234700973574409	0.00219488873435327	0.0047374826147427	0.00349878303198887	0.00217315716272601	0.000456363004172462	0.00358570931849791	0.0047374826147427	0.00149947844228095	0.0148861265646732	0.00249913073713491	0.00249913073713491	0.00232527816411683	0.00228181502086231	0.00215142559109875	0.000847531293463143	0.000282510431154381	0.00110831015299026	0.00136908901251739	0.00191237830319889	0.0194932197496523	0.00454189847009736	0.00447670375521558	0.00328146731571627	0.00199930458970793	0.0113873435326843	0.00606310848400556	0.00195584144645341	0.00195584144645341	0.00267298331015299	0.00504172461752434	0.0063673504867872	0.0198626564673157	0.00519384561891516	k__Chloroplastida;p__Chlorophyta;c__Trebouxiophyceae;o__unidentified;f__unidentified;g__Heveochlorella;s__Heveochlorella_hainangensis
OTU_31	0.00265125173852573	0.00152121001390821	0.00115177329624478	0.000369436717663421	0.00193410987482615	0.000630215577190542	0.000325973574408901	0.001086578581363	0.00551981919332406	0.00651947148817802	0.00541116133518776	0.00104311543810848	0.00289029902642559	0.00121696801112656	0.000738873435326843	0.000499826147426982	0.00202103616133519	0.000239047287899861	0.000999652294853964	0.00521557719054242	0.00391168289290681	0.00352051460361613	0.00471575104311544	0.0056067454798331	0.00686717663421419	0.00497652990264256	0.00365090403337969	0.00886648122392211	0.005932719054242	0.00612830319888734	0.00252086230876217	0.00267298331015299	0.00858397079276773	0.00265125173852573	0.000977920723226704	0.00628042420027816	k__Fungi;p__Ascomycota;c__Saccharomycetes;o__Saccharomycetales;f__Saccharomycetaceae;g__Saccharomyces;s__unidentified
OTU_32	0.00254259388038943	0.00271644645340751	0.00178198887343533	0.00156467315716273	0.00302068845618915	0.00334666203059805	0.00378129346314325	0.00588925591098748	0.00578059805285118	0.00995305980528512	0.00349878303198887	0.00954015994436718	0.00504172461752434	0.00404207232267038	0.00356397774687065	0.00404207232267038	0.0046288247566064	0.00215142559109875	0.00619349791376912	0.00295549374130737	0.00258605702364395	0.00541116133518776	0.00393341446453407	0.00423765646731572	0.0052807719054242	0.00410726703755216	0.00262952016689847	0.0130172114047288	0.00830146036161335	0.00223835187760779	0.00243393602225313	0.00297722531293463	0.00249913073713491	0.00269471488178025	0.00610657162726008	0.00508518776077886	k__Fungi;p__Ascomycota;c__Eurotiomycetes;o__Chaetothyriales;f__Chaetothyriaceae;g__Ceramothyrium;s__Ceramothyrium_carniolicum
OTU_33	0.00808414464534075	0.00273817802503477	0.00304242002781641	0.0103876912378303	0.00315107788595271	0.00678025034770515	0.0179937413073713	0.0228616133518776	0.00278164116828929	0.00365090403337969	0.00102138386648122	0.00106484700973574	0.00299895688456189	0.000760605006954103	0.001086578581363	0.00304242002781641	0.00141255215577191	0.00113004172461752	0.000586752433936022	0.000695410292072323	0.00208623087621697	0.001086578581363	0.00830146036161335	0.00149947844228095	0.000956189151599444	0.00145601529902643	0.00236874130737135	0.0041941933240612	0.0044115090403338	0.000651947148817803	0.00113004172461752	0.00297722531293463	0.000608484005563282	0.001086578581363	0.00252086230876217	0.001086578581363	k__Fungi;p__Ascomycota;c__Leotiomycetes;o__Helotiales;f__unidentified;g__Tetracladium;s__Tetracladium_marchalianum
OTU_34	0.0212534770514604	0.00508518776077886	0.00977920723226704	0.00782336578581363	0.00688890820584145	0.0099095966620306	0.00265125173852573	0.00275990959666203	0.00543289290681502	0.000890994436717663	0.000369436717663421	0.00149947844228095	0.00808414464534075	0.00299895688456189	0.00199930458970793	0.00243393602225313	0.00158640472878999	0.000738873435326843	0.000239047287899861	0.000608484005563282	0.000738873435326843	0.000239047287899861	0.00321627260083449	0.00330319888734353	0.000999652294853964	0.00208623087621697	0.00173852573018081	0.00171679415855355	0.00410726703755216	0.000890994436717663	0.00117350486787204	0.00130389429763561	0.00228181502086231	0.000738873435326843	0.00458536161335188	0.00139082058414465	k__Chloroplastida;p__Chlorophyta;c__Trebouxiophyceae;o__unidentified;f__unidentified;g__unidentified
OTU_35	0.00404207232267038	0.00182545201668985	0.00434631432545202	0.00358570931849791	0.0063673504867872	0.00280337273991655	0.00488960361613352	0.00384648817802503	0.00202103616133519	0.00415073018080668	0.00273817802503477	0.0050634561891516	0.00523730876216968	0.00475921418636996	0.0160596314325452	0.0140820584144645	0.0415724965229485	0.00260778859527121	0.00199930458970793	0.00323800417246175	0.0114960013908206	0.00328146731571627	0.0261865438108484	0.0109309805285118	0.00984440194714882	0.0389864394993046	0.0125391168289291	0.0050634561891516	0.0056067454798331	0.00113004172461752	0.00386821974965229	0.00271644645340751	0.00486787204450626	0.000825799721835883	0.00814933936022253	0.00171679415855355	k__Fungi;p__Ascomycota;c__Sordariomycetes;o__Glomerellales;f__Plectosphaerellaceae;g__Verticillium;s__uncultured_fungus
OTU_36	8.69262865090403e-05	0.0011952364394993	0.000456363004172462	0.0001086578581363	0.00173852573018081	0.000543289290681502	0.000369436717663421	0.0001086578581363	4.34631432545202e-05	0.000195584144645341	0.00943150208623088	0.00171679415855355	0.00143428372739917	0.0141255215577191	0.00612830319888734	0.00134735744089013	0.00617176634214186	0.00123869958275382	0.000478094575799722	0.000977920723226704	0.00184718358831711	0.00128216272600834	0.025904033379694	0.00714968706536857	0.00334666203059805	0.00375956189151599	0.0275121696801113	0.000673678720445063	0.000152121001390821	0.000565020862308762	0.000434631432545202	0.000239047287899861	0.000782336578581363	0.000521557719054242	6.51947148817803e-05	0	k__Chloroplastida;p__Streptophyta;c__Embryophyta;o__Caryophyllales;f__unidentified
OTU_37	0.000760605006954103	0.00104311543810848	0.00171679415855355	0.00241220445062587	0.00134735744089013	0.000912726008344923	0.00117350486787204	0.000152121001390821	0.000347705146036161	0.000630215577190542	0.075538942976356	0.00234700973574409	0.00262952016689847	0.00349878303198887	0.00182545201668985	0.0177329624478442	0.00406380389429764	0.000782336578581363	0.000304242002781641	0.000869262865090403	0.000391168289290681	0.00232527816411683	0.000325973574408901	0.000369436717663421	0.000478094575799722	0.000738873435326843	0.00113004172461752	0.000543289290681502	0.00197757301808067	0.00115177329624478	0.00162986787204451	0.00243393602225313	0.00165159944367177	0.000608484005563282	0.001086578581363	0.000977920723226704	k__Chloroplastida;p__Chlorophyta;c__Chlorophyceae;o__unidentified;f__unidentified;g__Desmodesmus
OTU_38	0.00180372044506259	0.00382475660639777	0.00343358831710709	0.00102138386648122	0.00158640472878999	0.000760605006954103	0.000260778859527121	0.000173852573018081	0.00117350486787204	0.000478094575799722	0.00486787204450626	0.00154294158553547	0.00391168289290681	0.0268384909596662	0.0044115090403338	0.00286856745479833	0.00271644645340751	0.00110831015299026	0.000434631432545202	0.00186891515994437	0.00480267732962448	0.00432458275382476	0.0011952364394993	0.00173852573018081	0.00488960361613352	0.00732353963838665	0.00132562586926287	0.00395514603616133	0.00184718358831711	0.00306415159944367	0.00141255215577191	0.000651947148817803	0.000782336578581363	0.000239047287899861	0.00126043115438108	0.00152121001390821	k__Chloroplastida;p__Chlorophyta;c__Ulvophyceae;o__unidentified;f__unidentified;g__unidentified;s__Desmochloris_mollenhaueri
OTU_39	0.00145601529902643	0.000173852573018081	0.000152121001390821	0.000456363004172462	0.00232527816411683	0.000890994436717663	0.000977920723226704	0.000651947148817803	0.00193410987482615	0.00167333101529903	0.000869262865090403	8.69262865090403e-05	0.00132562586926287	0.000130389429763561	0.0001086578581363	0.000630215577190542	0.000369436717663421	2.17315716272601e-05	6.51947148817803e-05	0.00156467315716273	0.000869262865090403	0.000847531293463143	0.000847531293463143	0.0104528859527121	0.000999652294853964	0.000717141863699583	0.00317280945757997	0.000738873435326843	0.00139082058414465	0.00106484700973574	8.69262865090403e-05	0.000369436717663421	0.000347705146036161	0.000239047287899861	6.51947148817803e-05	2.17315716272601e-05	k__Fungi;p__Basidiomycota;c__Exobasidiomycetidae;o__Malasseziales;f__unidentified;g__Malassezia;s__uncultured_organism
OTU_40	0.00271644645340751	0.00126043115438108	0.00734527121001391	0.00139082058414465	0.00497652990264256	0.00232527816411683	0.000847531293463143	0.000325973574408901	0.000825799721835883	0.000651947148817803	0.000673678720445063	0.00245566759388039	0.00173852573018081	0.00239047287899861	0.00271644645340751	0.000912726008344923	0.00126043115438108	0.000239047287899861	6.51947148817803e-05	0.000999652294853964	0.00158640472878999	0.000912726008344923	0.00197757301808067	0.00152121001390821	0.00315107788595271	0.0112352225312935	0.00106484700973574	0.0046288247566064	0.00223835187760779	0.00158640472878999	0.00278164116828929	0.000347705146036161	0.00204276773296245	0.000499826147426982	0.00269471488178025	0.00458536161335188	k__Chloroplastida;p__Chlorophyta;c__Ulvophyceae;o__unidentified;f__unidentified
OTU_41	0.000130389429763561	4.34631432545202e-05	0.000130389429763561	2.17315716272601e-05	0.000130389429763561	0.0001086578581363	2.17315716272601e-05	2.17315716272601e-05	0	0.00304242002781641	6.51947148817803e-05	0.0011952364394993	0.000282510431154381	6.51947148817803e-05	4.34631432545202e-05	0	0.0001086578581363	8.69262865090403e-05	4.34631432545202e-05	4.34631432545202e-05	0.00106484700973574	0.000956189151599444	0.0601964534075104	0.0191237830319889	0.00228181502086231	0.00195584144645341	0.000847531293463143	0.000934457579972184	0.000130389429763561	4.34631432545202e-05	6.51947148817803e-05	0	0.000869262865090403	0.000130389429763561	0	2.17315716272601e-05	k__Chloroplastida;p__Streptophyta;c__Embryophyta
OTU_42	0.00782336578581363	0.00588925591098748	0.0043028511821975	0.0129302851182197	0.0062586926286509	0.0120175591098748	0.01879780945758	0.0594575799721836	0.0054980876216968	0.0176894993045897	0.0176025730180807	0.00510691933240612	0.0114090751043115	0.0285987482614743	0.032249652294854	0.0215359874826147	0.0117350486787204	0.00482440890125174	0.00328146731571627	0.00247739916550765	0.0230354659248957	0.030750173852573	0.0198409248956885	0.0103442280945758	0.0249913073713491	0.0203407510431154	0.0173200625869263	0.00649773991655076	0.0054980876216968	0.00347705146036161	0.00254259388038943	0.00460709318497914	0.00195584144645341	0.00271644645340751	0.0047374826147427	0.00578059805285118	k__Fungi;p__Ascomycota;c__Sordariomycetes;o__Hypocreales;f__unidentified;g__unidentified;s__uncultured_fungus
OTU_43	0.00243393602225313	0.00167333101529903	6.51947148817803e-05	0.00249913073713491	0.000847531293463143	0.000760605006954103	0.000456363004172462	0.000152121001390821	0.000260778859527121	0.000847531293463143	0.00139082058414465	0.000673678720445063	0.0045201668984701	0.00230354659248957	0.000412899860917942	0.00423765646731572	0.00117350486787204	0.000977920723226704	0.000347705146036161	0.000565020862308762	0.00160813630041725	0.00234700973574409	0.00221662030598053	0.00475921418636996	0.00725834492350487	0.00269471488178025	0.00793202364394993	0.00160813630041725	0.00565020862308762	0.00404207232267038	0.000717141863699583	0.00908379694019472	0.00189064673157163	0.00334666203059805	0.000825799721835883	0.00104311543810848	k__Fungi;p__Basidiomycota;c__Tremellomycetidae;o__Tremellales;f__unidentified;g__Trichosporon;s__Trichosporon_coremiiforme
OTU_44	0.00373783031988873	0.0046288247566064	0.00302068845618915	0.00402034075104312	0.00554155076495132	0.00328146731571627	0.00241220445062587	0.00136908901251739	0.00873609179415855	0.000521557719054242	0.000565020862308762	0.00173852573018081	0.00219488873435327	0.00202103616133519	0.00252086230876217	0.00154294158553547	0.00204276773296245	0.000869262865090403	0.000347705146036161	0.000890994436717663	0.00252086230876217	0.00449843532684284	0.00949669680111266	0.00219488873435327	0.0109961752433936	0.00534596662030598	0.00302068845618915	0.00176025730180807	0.00145601529902643	0.000782336578581363	0.00117350486787204	0.00128216272600834	0.00182545201668985	0.00102138386648122	0.00106484700973574	0.00286856745479833	k__Chloroplastida;p__Chlorophyta;c__Trebouxiophyceae;o__unidentified;f__unidentified;g__Coccomyxa;s__Coccomyxa_sp._MW8233i
OTU_45	0.00260778859527121	0.00449843532684284	0.00136908901251739	0.00184718358831711	0.00121696801112656	0.000847531293463143	0.00334666203059805	0.000695410292072323	0.000738873435326843	0.00134735744089013	0.00349878303198887	0.00488960361613352	0.00962708623087622	0.00962708623087622	0.00399860917941586	0.00591098748261474	0.00323800417246175	0.00115177329624478	0.00215142559109875	0.00128216272600834	0.0121479485396384	0.020558066759388	0.00215142559109875	0.00173852573018081	0.00293376216968011	0.00176025730180807	0.00221662030598053	0.000260778859527121	0.000260778859527121	0.000391168289290681	0.000173852573018081	0.000304242002781641	0.000260778859527121	0.000130389429763561	0.000304242002781641	0.000130389429763561	k__Stramenopiles;p__unidentified;c__Chrysophyceae;o__Chromulinales;f__unidentified;g__Spumella;s__Spumella_elongata
OTU_46	0.00134735744089013	0.00173852573018081	0.00117350486787204	0.00162986787204451	0.00139082058414465	0.00189064673157163	0.000499826147426982	0.000565020862308762	0.0707579972183588	8.69262865090403e-05	0.00256432545201669	0.000347705146036161	0.000565020862308762	0.000695410292072323	0.000152121001390821	0.000804068150208623	0.000217315716272601	0.000260778859527121	0.000173852573018081	0.00234700973574409	0.000282510431154381	0.000282510431154381	0.000369436717663421	0.00147774687065369	0.000999652294853964	0.000586752433936022	0.000434631432545202	4.34631432545202e-05	0.000369436717663421	0.000173852573018081	0.000130389429763561	0.000239047287899861	0.000217315716272601	0.000173852573018081	0	6.51947148817803e-05	k__Fungi;p__Basidiomycota;c__Agaricomycetes;o__unidentified;f__unidentified;g__Trametes;s__Trametes_versicolor
OTU_47	0.00126043115438108	0.000999652294853964	0.00221662030598053	0.00139082058414465	0.00160813630041725	0.00154294158553547	0.00510691933240612	0.00245566759388039	0.0131476008344924	0.00134735744089013	0.000456363004172462	0.00128216272600834	0.00152121001390821	0.000543289290681502	0.00117350486787204	0.000934457579972184	0.000738873435326843	0.000543289290681502	0.000369436717663421	0.000760605006954103	0.00291203059805285	0.00362917246175243	0.00460709318497914	0.0104746175243394	0.00260778859527121	0.00449843532684284	0.00434631432545202	0.00488960361613352	0.00208623087621697	0.000608484005563282	0.000760605006954103	0.000825799721835883	0.000456363004172462	0.000630215577190542	0.00162986787204451	0.000347705146036161	k__Chloroplastida;p__Chlorophyta;c__Trebouxiophyceae;o__unidentified;f__unidentified;g__unidentified;s__Chlorella_sp._MBIC10057
OTU_48	0.0180589360222531	0.014625347705146	0.00854050764951321	0.00638908205841446	0.0431589012517385	0.0098009388038943	0.00664986091794159	0.00332493045897079	0.0100399860917942	0.00171679415855355	0.000738873435326843	0.00469401947148818	0.00606310848400556	0.00352051460361613	0.00299895688456189	0.00171679415855355	0.00499826147426982	0.00106484700973574	0.000412899860917942	0.000956189151599444	0.00215142559109875	0.00321627260083449	0.00847531293463143	0.00349878303198887	0.00701929763560501	0.00821453407510431	0.00258605702364395	0.00267298331015299	0.00308588317107093	0.00134735744089013	0.00145601529902643	0.00121696801112656	0.00382475660639777	0.001086578581363	0.00171679415855355	0.000977920723226704	k__Chloroplastida;p__Chlorophyta;c__Trebouxiophyceae;o__unidentified;f__unidentified;g__Chlorella
OTU_49	6.51947148817803e-05	0.00110831015299026	0.000173852573018081	0.00134735744089013	0.0011952364394993	0.000782336578581363	0.0001086578581363	4.34631432545202e-05	4.34631432545202e-05	0.00312934631432545	0.00202103616133519	0.00115177329624478	0.00239047287899861	0.00745392906815021	0.00354224617524339	0.0152772948539638	0.00823626564673157	0.00310761474269819	0.00113004172461752	0.00149947844228095	0.00149947844228095	0.000499826147426982	0.000304242002781641	0.0001086578581363	0.00121696801112656	0.00106484700973574	0.00212969401947149	0	4.34631432545202e-05	0.000608484005563282	0.0001086578581363	0.00117350486787204	0.000738873435326843	0.000651947148817803	2.17315716272601e-05	0.000282510431154381	k__Chloroplastida;p__Streptophyta;c__Embryophyta
OTU_50	0.0124739221140473	0.00588925591098748	0.0102138386648122	0.0191455146036161	0.00995305980528512	0.0119958275382476	0.0561543810848401	0.0260561543810848	0.0247087969401947	0.00960535465924896	0.00465055632823366	0.00330319888734353	0.00934457579972184	0.0095836230876217	0.0125391168289291	0.00882301808066759	0.0116698539638387	0.00284683588317107	0.00167333101529903	0.00493306675938804	0.00804068150208623	0.0043028511821975	0.00719315020862309	0.0115611961057024	0.0113004172461752	0.00921418636995828	0.0166029207232267	0.0061500347705146	0.00825799721835883	0.00208623087621697	0.00395514603616133	0.00860570236439499	0.00302068845618915	0.00293376216968011	0.00743219749652295	0.00349878303198887	k__Fungi;p__Ascomycota;c__Leotiomycetes;o__Helotiales;f__unidentified;g__unidentified;s__unidentified
OTU_51	0.00580232962447844	0.00623696105702364	0.00423765646731572	0.00719315020862309	0.00501999304589708	0.00512865090403338	0.00306415159944367	0.00212969401947149	0.000847531293463143	0.000434631432545202	0.0263603963838665	0.00278164116828929	0.00971401251738526	0.00352051460361613	0.00378129346314325	0.0228616133518776	0.0045201668984701	0.00243393602225313	0.000499826147426982	0.00126043115438108	0.000456363004172462	0.0011952364394993	0.000456363004172462	0.00230354659248957	0.00147774687065369	0.00141255215577191	0.00667159248956885	0.000369436717663421	0.00176025730180807	0.000912726008344923	0.000760605006954103	0.00230354659248957	0.0039768776077886	0.000956189151599444	0.00297722531293463	0.000130389429763561	k__Chloroplastida;p__Chlorophyta;c__Trebouxiophyceae;o__unidentified;f__unidentified;g__Chlorella;s__Chlorella_vulgaris
OTU_52	0.00312934631432545	0.00162986787204451	0.00830146036161335	0.00319454102920723	0.00221662030598053	0.00456363004172462	0.000782336578581363	0.0101486439499305	0.00223835187760779	0.00710622392211405	0.000956189151599444	0.000478094575799722	0.000630215577190542	0.000217315716272601	0.000869262865090403	0.000782336578581363	0.000347705146036161	0.000434631432545202	0.000369436717663421	0.000152121001390821	0.000586752433936022	0.0001086578581363	0.000173852573018081	0.000434631432545202	0.000325973574408901	0.00126043115438108	0.000695410292072323	0.00256432545201669	0.00154294158553547	0.00171679415855355	0.00158640472878999	0.00113004172461752	0.00406380389429764	0.000890994436717663	0.000130389429763561	0.000695410292072323	k__Fungi;p__Ascomycota;c__Saccharomycetes;o__Saccharomycetales;f__Saccharomycetaceae;g__Pichia;s__Pichia_kudriavzevii
OTU_53	4.34631432545202e-05	4.34631432545202e-05	0.000434631432545202	0.000152121001390821	0	8.69262865090403e-05	0.0001086578581363	0	0	4.34631432545202e-05	4.34631432545202e-05	0.000695410292072323	4.34631432545202e-05	8.69262865090403e-05	0.00167333101529903	0.000565020862308762	4.34631432545202e-05	8.69262865090403e-05	0.000239047287899861	0	0.000434631432545202	0.00184718358831711	0.00906206536856746	0.000412899860917942	0.001086578581363	0.00497652990264256	0.0407249652294854	0.000325973574408901	6.51947148817803e-05	0	0.000499826147426982	0.000282510431154381	4.34631432545202e-05	0.000130389429763561	0	0	k__Chloroplastida;p__Streptophyta;c__Embryophyta;o__Ericales;f__unidentified;g__Impatiens;s__Impatiens_pallida
OTU_54	0.000543289290681502	0.000282510431154381	0.000738873435326843	0.000173852573018081	0.000391168289290681	0.000217315716272601	0.0001086578581363	2.17315716272601e-05	0.000651947148817803	0.00139082058414465	0.000456363004172462	0.000304242002781641	0.000912726008344923	0.000239047287899861	0.000782336578581363	0.000391168289290681	0.000325973574408901	0.000152121001390821	4.34631432545202e-05	0.000565020862308762	0.000999652294853964	0.000738873435326843	0.000738873435326843	0.00141255215577191	0.00221662030598053	0.00460709318497914	0.000673678720445063	0.00289029902642559	0.000521557719054242	0.000782336578581363	0.000760605006954103	0.000260778859527121	0.00158640472878999	0.000499826147426982	0	0.000412899860917942	k__Chloroplastida;p__Streptophyta;c__Embryophyta;o__Fagales;f__unidentified;g__unidentified;s__uncultured_eukaryote
OTU_55	0.00147774687065369	0.00126043115438108	0.00302068845618915	0.000825799721835883	0.00171679415855355	0.00186891515994437	0.00234700973574409	0.000956189151599444	0.00521557719054242	0.00178198887343533	0.000651947148817803	0.00239047287899861	0.00358570931849791	0.000977920723226704	0.00173852573018081	0.00134735744089013	0.00136908901251739	0.00115177329624478	0.000521557719054242	0.000847531293463143	0.00356397774687065	0.00830146036161335	0.004846140472879	0.00308588317107093	0.0090403337969402	0.00786682892906815	0.00258605702364395	0.000391168289290681	0.000956189151599444	0.000651947148817803	0.00160813630041725	0.000456363004172462	0.000456363004172462	0.000738873435326843	0.000325973574408901	0.00136908901251739	k__Chloroplastida;p__Chlorophyta;c__Trebouxiophyceae;o__unidentified;f__unidentified;g__Dictyochloropsis;s__Dictyochloropsis_splendida
OTU_56	0.001086578581363	0.00145601529902643	0.000717141863699583	0.000499826147426982	0.000499826147426982	0.00189064673157163	0.00330319888734353	0.000456363004172462	0.00706276077885953	0.018297983310153	0.000325973574408901	0.000651947148817803	0.00297722531293463	0.000673678720445063	0.000565020862308762	0.000804068150208623	0.000499826147426982	0.00154294158553547	6.51947148817803e-05	0.000478094575799722	0.00184718358831711	0.00423765646731572	0.00378129346314325	0.00354224617524339	0.0206884561891516	0.00239047287899861	0.0119740959666203	0.000195584144645341	0.00121696801112656	0.000412899860917942	0.000152121001390821	0.000347705146036161	0.000195584144645341	0.000651947148817803	0.000347705146036161	0.000760605006954103	k__Chloroplastida;p__Streptophyta;c__Embryophyta;o__Polypodiales;f__unidentified;g__Pteridium;s__Pteridium_aquilinum
OTU_57	0.000152121001390821	2.17315716272601e-05	4.34631432545202e-05	0.000565020862308762	0.000369436717663421	2.17315716272601e-05	8.69262865090403e-05	0.000239047287899861	0	0.000825799721835883	0.00388995132127956	0.000369436717663421	0.000782336578581363	0.000608484005563282	0.000412899860917942	0.0145818845618915	0.00547635605006954	0.000260778859527121	0.000478094575799722	0.000369436717663421	0.000825799721835883	0.000304242002781641	0.000282510431154381	0.000347705146036161	0.000543289290681502	0.000478094575799722	0.00104311543810848	0	0.000282510431154381	4.34631432545202e-05	6.51947148817803e-05	0.000977920723226704	0.000521557719054242	0.000130389429763561	6.51947148817803e-05	0.000325973574408901	k__Fungi;p__Basidiomycota;c__Ustilaginomycetes;o__Ustilaginales;f__Ustilaginaceae;g__unidentified;s__Sporisorium_sp._B10
OTU_58	0.00167333101529903	0.000999652294853964	0.00334666203059805	0.00106484700973574	0.00160813630041725	0.00113004172461752	0.00134735744089013	8.69262865090403e-05	0.000543289290681502	0.000565020862308762	0.000782336578581363	0.000760605006954103	0.00160813630041725	0.00247739916550765	0.00173852573018081	0.000738873435326843	0.000869262865090403	0.000391168289290681	0.000282510431154381	0.000521557719054242	0.000673678720445063	0.000347705146036161	0.00110831015299026	0.00126043115438108	0.00217315716272601	0.00388995132127956	0.0050634561891516	0.00456363004172462	0.00293376216968011	0.00165159944367177	0.00243393602225313	0.001086578581363	0.00212969401947149	0.000586752433936022	0.00375956189151599	0.000869262865090403	k__Fungi;p__Ascomycota;c__Dothideomycetes
OTU_59	0.00106484700973574	0.000369436717663421	0.00115177329624478	0.000565020862308762	0.000934457579972184	0.000890994436717663	0.00195584144645341	0.000152121001390821	0.00399860917941586	0.000586752433936022	0.000521557719054242	0.00345531988873435	0.00106484700973574	0.0011952364394993	0.000956189151599444	0.000847531293463143	0.00156467315716273	0.000369436717663421	0.000282510431154381	0.000717141863699583	0.00113004172461752	0.00206449930458971	0.00204276773296245	0.000782336578581363	0.00158640472878999	0.00202103616133519	0.000630215577190542	0.0103659596662031	0.00480267732962448	0.000456363004172462	0.00149947844228095	0.000956189151599444	0.00234700973574409	0.000977920723226704	0.00434631432545202	0.00469401947148818	k__Chloroplastida;p__Chlorophyta;c__Trebouxiophyceae;o__unidentified;f__unidentified
OTU_60	0.000325973574408901	0	0	0	4.34631432545202e-05	0	0	0	0	0.00115177329624478	0.000521557719054242	4.34631432545202e-05	0.000391168289290681	0	0	2.17315716272601e-05	0	0	0	0	0	0	0	0.0001086578581363	2.17315716272601e-05	0	0.000260778859527121	0.000391168289290681	0.000239047287899861	0.000130389429763561	2.17315716272601e-05	0	0.000565020862308762	0	4.34631432545202e-05	0	k__Animalia;p__Mollusca;c__Bivalvia;o__Ostreoida;f__unidentified;g__unidentified;s__Crassostrea_angulata
OTU_61	0.004846140472879	0.00165159944367177	0.000738873435326843	0.001086578581363	0.0011952364394993	0.00162986787204451	0.000782336578581363	0.000347705146036161	0.00126043115438108	0.000630215577190542	0.000456363004172462	0.000325973574408901	0.00360744089012517	0.000869262865090403	0.000369436717663421	0.000195584144645341	0.000521557719054242	0.000325973574408901	0.000152121001390821	0.000673678720445063	0.00193410987482615	0.00149947844228095	0.00158640472878999	0.0040855354659249	0.00239047287899861	0.00221662030598053	0.00134735744089013	0.000717141863699583	0.00315107788595271	0.000977920723226704	0.000521557719054242	0.000673678720445063	0.000630215577190542	0.000673678720445063	0.000239047287899861	0.000239047287899861	k__Fungi;p__Ascomycota;c__Saccharomycetes;o__Saccharomycetales;f__unidentified;g__Candida
OTU_62	0.000369436717663421	8.69262865090403e-05	0.000304242002781641	0.000369436717663421	0.000282510431154381	0.000239047287899861	0.000999652294853964	0.00215142559109875	0.000521557719054242	0.000325973574408901	0.000695410292072323	0.001086578581363	0.00221662030598053	0.000999652294853964	0.00117350486787204	0.00184718358831711	0.00182545201668985	0.000673678720445063	0.0110613699582754	0.0011952364394993	0.000456363004172462	0.000890994436717663	0.000499826147426982	0.000586752433936022	0.000478094575799722	0.000456363004172462	0.000260778859527121	0.000543289290681502	0.000565020862308762	6.51947148817803e-05	0.000369436717663421	0.000369436717663421	0.000217315716272601	0.000195584144645341	0.000782336578581363	0.00230354659248957	k__Fungi;p__Ascomycota;c__Dothideomycetes
OTU_63	0.000565020862308762	0	2.17315716272601e-05	0	0	0	0	0	0	0	4.34631432545202e-05	0.000543289290681502	0.0292724269819193	0.000521557719054242	0.000521557719054242	0.000717141863699583	0.000282510431154381	0.000260778859527121	0.000586752433936022	0.000217315716272601	0.0001086578581363	0.001086578581363	4.34631432545202e-05	0.00447670375521558	6.51947148817803e-05	0.000152121001390821	4.34631432545202e-05	0	0.000521557719054242	0	0	2.17315716272601e-05	0	0	0.0001086578581363	0	k__Alveolata;p__Ciliophora;c__Oligohymenophorea;o__Conthreep;f__unidentified;g__Telotrochidium;s__Telotrochidium_matiense
OTU_64	0.000347705146036161	0.000369436717663421	0.000586752433936022	0.000434631432545202	0.000717141863699583	0.000956189151599444	0.000369436717663421	0.000195584144645341	0.0050634561891516	0.001086578581363	0.000478094575799722	0.000173852573018081	0.000217315716272601	0.000152121001390821	0.000499826147426982	0.000456363004172462	0.000478094575799722	0.000325973574408901	0.000260778859527121	0.000412899860917942	0.00269471488178025	0.00402034075104312	0.0011952364394993	0.00182545201668985	0.00139082058414465	0.00249913073713491	0.00210796244784423	0.000977920723226704	0.000847531293463143	0.000152121001390821	0.000586752433936022	0.000521557719054242	0.000391168289290681	0.000521557719054242	0.000804068150208623	0.00365090403337969	k__Chloroplastida;p__Chlorophyta;c__Trebouxiophyceae;o__unidentified;f__unidentified
OTU_65	0.000195584144645341	0.000391168289290681	0.0001086578581363	0.000239047287899861	0.000717141863699583	0.000347705146036161	0.000847531293463143	0.000565020862308762	4.34631432545202e-05	0.000999652294853964	0.00358570931849791	0.00345531988873435	0.00136908901251739	0.00291203059805285	0.00341185674547983	0.00165159944367177	0.00519384561891516	0.000651947148817803	0.000412899860917942	0.000304242002781641	0.000478094575799722	0.000543289290681502	0.00102138386648122	0.00302068845618915	0.000651947148817803	0.000239047287899861	0.000412899860917942	0.000695410292072323	0.000738873435326843	0.000369436717663421	0.000195584144645341	0.000347705146036161	0.000456363004172462	0.000195584144645341	0.000630215577190542	0.000391168289290681	k__Fungi;p__Ascomycota;c__Dothideomycetes;o__Pleosporales;f__Pleosporaceae
OTU_66	0.00178198887343533	0.00193410987482615	0.00132562586926287	0.00106484700973574	0.00204276773296245	0.00117350486787204	0.00367263560500695	0.00128216272600834	0.00362917246175243	0.000217315716272601	0.000412899860917942	0.00245566759388039	0.000956189151599444	0.000695410292072323	0.000521557719054242	0.000717141863699583	0.000804068150208623	0.000282510431154381	0.000130389429763561	0.000369436717663421	0.000738873435326843	0.00189064673157163	0.000695410292072323	0.00306415159944367	0.00286856745479833	0.00191237830319889	0.00154294158553547	0.000565020862308762	0.00193410987482615	0.000499826147426982	0.000608484005563282	0.000478094575799722	0.000673678720445063	0.000565020862308762	0.00104311543810848	0.00162986787204451	k__Chloroplastida;p__Chlorophyta;c__Trebouxiophyceae;o__unidentified;f__unidentified;g__Dictyochloropsis;s__Dictyochloropsis_irregularis
OTU_67	0.000543289290681502	0.000630215577190542	0.000304242002781641	0.000434631432545202	0.000347705146036161	0.000456363004172462	0.00208623087621697	0.000521557719054242	0.00178198887343533	0.00217315716272601	0.00169506258692629	0.00273817802503477	0.000912726008344923	0.000890994436717663	0.00158640472878999	0.000695410292072323	0.000586752433936022	0.000434631432545202	0.000999652294853964	0.000347705146036161	0.000347705146036161	0.00143428372739917	0.00143428372739917	0.00121696801112656	0.00106484700973574	0.000412899860917942	0.00104311543810848	0.000239047287899861	0.00143428372739917	0.000565020862308762	0.0001086578581363	0.000478094575799722	0.00158640472878999	0.000217315716272601	0.00165159944367177	0.00212969401947149	k__Fungi;p__Basidiomycota;c__unidentified;o__unidentified;f__unidentified;g__uncultured;s__uncultured_fungus
OTU_68	0.000412899860917942	0.000239047287899861	0.000717141863699583	0.000347705146036161	0.000347705146036161	0.00102138386648122	0.0143863004172462	0.0191020514603616	0.000760605006954103	2.17315716272601e-05	2.17315716272601e-05	0.000217315716272601	6.51947148817803e-05	6.51947148817803e-05	8.69262865090403e-05	0	0.000173852573018081	4.34631432545202e-05	0.000282510431154381	4.34631432545202e-05	0.000260778859527121	6.51947148817803e-05	8.69262865090403e-05	0.000130389429763561	0.000152121001390821	0.000478094575799722	6.51947148817803e-05	6.51947148817803e-05	0.000434631432545202	2.17315716272601e-05	0.0001086578581363	0.000152121001390821	4.34631432545202e-05	4.34631432545202e-05	4.34631432545202e-05	0.00110831015299026	k__Fungi;p__Ascomycota;c__Leotiomycetes
OTU_69	0.000456363004172462	0.000325973574408901	0.000130389429763561	0.00193410987482615	0.000152121001390821	0.000521557719054242	0.000304242002781641	0.0001086578581363	0.000130389429763561	0.00271644645340751	0.000934457579972184	0.000738873435326843	0.00234700973574409	0.00102138386648122	0.000999652294853964	0.00532423504867872	0.0011952364394993	0.000695410292072323	0.000434631432545202	0.000760605006954103	0.00199930458970793	0.000565020862308762	0.000282510431154381	0.000282510431154381	0.000152121001390821	0.000347705146036161	0.00191237830319889	0.000456363004172462	0.00128216272600834	0.000586752433936022	0.000478094575799722	0.00271644645340751	0.000934457579972184	0.000956189151599444	0.000347705146036161	0.000673678720445063	k__Fungi;p__Ascomycota;c__Saccharomycetes;o__Saccharomycetales;f__unidentified;g__Candida;s__Candida_solani
OTU_70	0.000195584144645341	0.000651947148817803	0.000543289290681502	0.000347705146036161	0.000325973574408901	0.000630215577190542	0.000347705146036161	4.34631432545202e-05	0.00317280945757997	2.17315716272601e-05	0.000130389429763561	0.000630215577190542	0.000282510431154381	0.000391168289290681	0.000260778859527121	0.000282510431154381	0.000195584144645341	0.000325973574408901	0	0.0001086578581363	0.000869262865090403	0.00110831015299026	0.0103659596662031	0.000673678720445063	0.00595445062586926	0.00169506258692629	0.00349878303198887	0.000282510431154381	0.000239047287899861	0.000260778859527121	0.000478094575799722	0.000239047287899861	8.69262865090403e-05	0.000195584144645341	0.000130389429763561	6.51947148817803e-05	k__Chloroplastida;p__Chlorophyta;c__Trebouxiophyceae;o__unidentified;f__unidentified
OTU_71	0.00102138386648122	0.000347705146036161	0.00104311543810848	0.000890994436717663	0.00104311543810848	0.000912726008344923	0.00823626564673157	0.000782336578581363	0.000912726008344923	0.000347705146036161	0.000608484005563282	0.00113004172461752	0.0011952364394993	0.000369436717663421	0.000630215577190542	0.00130389429763561	0.000565020862308762	0.000195584144645341	0.000956189151599444	0.000434631432545202	0.000586752433936022	0.000825799721835883	0.00106484700973574	0.000651947148817803	0.000608484005563282	0.000673678720445063	0.00106484700973574	0.0043028511821975	0.00312934631432545	0.000630215577190542	0.000912726008344923	0.00189064673157163	0.00121696801112656	0.000586752433936022	0.00223835187760779	0.00543289290681502	k__Chloroplastida;p__Chlorophyta;c__Trebouxiophyceae;o__unidentified;f__unidentified;g__Chlorella;s__Heterochlorella_luteoviridis
OTU_72	0.000260778859527121	0.0001086578581363	0.000130389429763561	0.000391168289290681	0.000152121001390821	0.000347705146036161	0.000217315716272601	0.000717141863699583	0.000152121001390821	0.000173852573018081	0.00110831015299026	0.00260778859527121	0.00130389429763561	0.000804068150208623	0.00152121001390821	0.00275990959666203	0.0011952364394993	0.00117350486787204	0.00354224617524339	0.000586752433936022	4.34631432545202e-05	0.000217315716272601	0.000369436717663421	0.000760605006954103	0.000130389429763561	4.34631432545202e-05	0.000869262865090403	0.00134735744089013	0.000391168289290681	0.000347705146036161	0.000282510431154381	0.000738873435326843	0.000195584144645341	0.000630215577190542	0.000956189151599444	0.0056067454798331	k__Fungi;p__Ascomycota
OTU_73	0.000369436717663421	0.000456363004172462	0.000325973574408901	0.000304242002781641	0.00110831015299026	0.000673678720445063	0.000825799721835883	4.34631432545202e-05	0.00230354659248957	6.51947148817803e-05	2.17315716272601e-05	0.000217315716272601	0.000195584144645341	0.000347705146036161	4.34631432545202e-05	0.000130389429763561	0.000565020862308762	6.51947148817803e-05	0	0.0001086578581363	0.000260778859527121	0.000412899860917942	0.000282510431154381	0.000325973574408901	0.00662812934631433	0.000782336578581363	0.000499826147426982	0.00110831015299026	0.0001086578581363	0.000195584144645341	6.51947148817803e-05	4.34631432545202e-05	0.000369436717663421	6.51947148817803e-05	0.000173852573018081	8.69262865090403e-05	k__Chloroplastida;p__Streptophyta;c__Embryophyta;o__Coniferales;f__unidentified;g__Cunninghamia;s__unidentified
OTU_74	0.00680198191933241	0.00436804589707928	0.0779946105702364	0.00699756606397775	0.00977920723226704	0.00508518776077886	0.00780163421418637	0.00658466620305981	0.00445497218358832	0.00171679415855355	0.000391168289290681	0.00601964534075104	0.00395514603616133	0.00523730876216968	0.00580232962447844	0.00234700973574409	0.00215142559109875	0.000956189151599444	0.000434631432545202	0.000608484005563282	0.00712795549374131	0.00158640472878999	0.0109527121001391	0.00575886648122392	0.00601964534075104	0.0174939151599444	0.00395514603616133	0.00291203059805285	0.00293376216968011	0.00256432545201669	0.00432458275382476	0.00249913073713491	0.00341185674547983	0.00110831015299026	0.00712795549374131	0.00273817802503477	k__Chloroplastida;p__Chlorophyta;c__Trebouxiophyceae;o__unidentified;f__unidentified;g__Stichococcus;s__Stichococcus_bacillaris
OTU_75	0.00176025730180807	0.000673678720445063	0.00173852573018081	0.00139082058414465	0.00130389429763561	0.00126043115438108	0.00106484700973574	0.00317280945757997	0.000282510431154381	0.000434631432545202	0.000478094575799722	0.000673678720445063	0.00139082058414465	0.000565020862308762	0.000804068150208623	0.000825799721835883	0.000369436717663421	0.000391168289290681	0.0001086578581363	0.000391168289290681	0.000999652294853964	0.00210796244784423	0.00260778859527121	0.00134735744089013	0.00223835187760779	0.00297722531293463	0.000869262865090403	0.000130389429763561	0.00117350486787204	0.000847531293463143	0.000630215577190542	0.000325973574408901	0.000217315716272601	0.000260778859527121	0.00154294158553547	0.0001086578581363	k__Chloroplastida;p__Chlorophyta;c__Trebouxiophyceae;o__unidentified;f__unidentified;g__Elliptochloris;s__Elliptochloris_subsphaerica
OTU_76	4.34631432545202e-05	0.000717141863699583	0.000239047287899861	0.0001086578581363	0.000195584144645341	2.17315716272601e-05	0.000152121001390821	0.000760605006954103	4.34631432545202e-05	0.000565020862308762	0.000912726008344923	0.000195584144645341	0.000760605006954103	0.00586752433936022	0.00252086230876217	0.00128216272600834	0.00117350486787204	0.000825799721835883	6.51947148817803e-05	0.000521557719054242	0.000630215577190542	0.000217315716272601	0.000369436717663421	0.00160813630041725	0.00152121001390821	0.000521557719054242	0.000217315716272601	0	0.0001086578581363	0.000977920723226704	0.000173852573018081	2.17315716272601e-05	0.000173852573018081	0.000173852573018081	0.000173852573018081	0	k__Fungi;p__Basidiomycota;c__Tremellomycetidae;o__Tremellales;f__unidentified;g__Cryptococcus;s__Cryptococcus_flavus
OTU_77	0.000847531293463143	0.000869262865090403	0.000325973574408901	0.000456363004172462	0.000434631432545202	0.000695410292072323	0.000869262865090403	0.00189064673157163	0.0001086578581363	0.00236874130737135	0.00117350486787204	0.00182545201668985	0.00186891515994437	0.00215142559109875	0.00234700973574409	0.00184718358831711	0.000782336578581363	0.001086578581363	0.000369436717663421	0.000456363004172462	0.00106484700973574	0.00121696801112656	0.00123869958275382	0.000608484005563282	0.00325973574408901	0.00132562586926287	0.000999652294853964	0.00286856745479833	0.00256432545201669	0.00147774687065369	0.000651947148817803	0.00104311543810848	0.000478094575799722	0.00110831015299026	0.000782336578581363	0.000608484005563282	k__Fungi;p__Basidiomycota;c__Tremellomycetidae;o__Tremellales;f__unidentified;g__unidentified
OTU_78	0.000347705146036161	0.000217315716272601	0.000434631432545202	0.000673678720445063	0.000239047287899861	0.000325973574408901	0.00162986787204451	0.000391168289290681	0.00373783031988873	0.000847531293463143	0.000347705146036161	0.000325973574408901	0.000412899860917942	0.000325973574408901	0.000499826147426982	0.000847531293463143	0.000543289290681502	0.000325973574408901	0.000543289290681502	0.000347705146036161	0.000304242002781641	0.000912726008344923	0.000347705146036161	0.0001086578581363	0.000434631432545202	0.000934457579972184	0.000456363004172462	0.00258605702364395	0.000847531293463143	0.000260778859527121	0.000478094575799722	0.000912726008344923	0.000434631432545202	0.000282510431154381	0.000152121001390821	0.00152121001390821	k__Fungi;p__Ascomycota;c__Lecanoromycetes;o__unidentified;f__unidentified;g__unidentified;s__Byssoloma_leucoblepharum
OTU_79	0.00176025730180807	0.00195584144645341	0.000977920723226704	0.00319454102920723	0.00110831015299026	0.00245566759388039	0.00343358831710709	0.00176025730180807	0.00126043115438108	0.000608484005563282	0.000152121001390821	0.000282510431154381	0.000912726008344923	0.000673678720445063	0.000651947148817803	0.00199930458970793	0.000521557719054242	0.000521557719054242	0.000890994436717663	0.000369436717663421	4.34631432545202e-05	0	0.000260778859527121	0.000282510431154381	0.000239047287899861	0.000369436717663421	0.000543289290681502	0.000391168289290681	0.00132562586926287	0.000543289290681502	0.000521557719054242	0.00195584144645341	0.000760605006954103	0.000869262865090403	0.00117350486787204	0.00291203059805285	k__Fungi;p__Basidiomycota;c__Tremellomycetidae
OTU_80	0.000152121001390821	0.00121696801112656	0.000239047287899861	0.000325973574408901	0.000260778859527121	0.00258605702364395	0.000260778859527121	0.000260778859527121	6.51947148817803e-05	0.00536769819193324	0.000999652294853964	0.00149947844228095	0.00178198887343533	0.00675851877607789	0.00760605006954103	0.00369436717663421	0.00184718358831711	0.00830146036161335	0.000760605006954103	0.00104311543810848	0.000912726008344923	0.000369436717663421	0.00317280945757997	0.00184718358831711	0.00588925591098748	0.00104311543810848	0.0131693324061196	0.000130389429763561	0.000173852573018081	0.000630215577190542	8.69262865090403e-05	0.000239047287899861	0.0001086578581363	0.00154294158553547	6.51947148817803e-05	0.000217315716272601	k__Chloroplastida;p__Streptophyta;c__Embryophyta;o__Asterales;f__unidentified;g__unidentified
OTU_81	0.00352051460361613	0.00234700973574409	0.00226008344923505	0.00445497218358832	0.00378129346314325	0.0040855354659249	0.00375956189151599	0.00226008344923505	0.00543289290681502	0.000152121001390821	0.000304242002781641	0.000130389429763561	0.000608484005563282	0.0001086578581363	0.000260778859527121	0.000999652294853964	0.000651947148817803	0.000239047287899861	0.000434631432545202	0.001086578581363	4.34631432545202e-05	0.000130389429763561	0.0001086578581363	0.000304242002781641	4.34631432545202e-05	0.000347705146036161	0.00113004172461752	0.000217315716272601	0.000999652294853964	0.000347705146036161	0.000651947148817803	0.00167333101529903	0.000999652294853964	0.0011952364394993	0.000782336578581363	0.000890994436717663	k__Fungi;p__Basidiomycota;c__Tremellomycetidae;o__Cystofilobasidiales;f__Cystofilobasidiaceae;g__Mrakiella;s__Mrakiella_aquatica
OTU_82	0	0	0	0	0	0	0	0	0.000369436717663421	0	0	0	0	0	0	0	0	0	0	0.000347705146036161	8.69262865090403e-05	0.000130389429763561	0.000130389429763561	4.34631432545202e-05	0.000260778859527121	0.000195584144645341	0.000217315716272601	0	0	0	0	0	0	0	0	0	k__Fungi;p__Basidiomycota;c__Exobasidiomycetidae;o__Malasseziales;f__unidentified;g__Malassezia;s__Malassezia_obtusa
OTU_83	0.000130389429763561	0	6.51947148817803e-05	0	4.34631432545202e-05	8.69262865090403e-05	2.17315716272601e-05	0.00128216272600834	2.17315716272601e-05	2.17315716272601e-05	8.69262865090403e-05	0	0.0001086578581363	4.34631432545202e-05	0	0	4.34631432545202e-05	0	0	0	0	0.000152121001390821	0.000130389429763561	0.00332493045897079	0.00295549374130737	0.00126043115438108	8.69262865090403e-05	0	4.34631432545202e-05	4.34631432545202e-05	0	0	0.000478094575799722	4.34631432545202e-05	0	0	k__Animalia;p__Mollusca;c__Bivalvia;o__Mytiloida;f__unidentified;g__unidentified;s__Bathymodiolus_mauritanicus
OTU_84	0.000282510431154381	0.000434631432545202	0.000651947148817803	0.000543289290681502	0.000630215577190542	0.00176025730180807	0.000239047287899861	0.000173852573018081	0.00226008344923505	0.000499826147426982	0.000239047287899861	0.000521557719054242	0.000152121001390821	0.000282510431154381	0.00267298331015299	0.000543289290681502	0.000217315716272601	0.00106484700973574	0.000173852573018081	0.000130389429763561	0.00202103616133519	0.000412899860917942	0.00136908901251739	0.000521557719054242	0.00169506258692629	0.00126043115438108	0.0171679415855355	0.00130389429763561	0.0001086578581363	0.000260778859527121	0.000217315716272601	0.000282510431154381	0.000608484005563282	0.000738873435326843	0.000456363004172462	0.00343358831710709	k__Chloroplastida;p__Streptophyta;c__Embryophyta;o__Rosales;f__unidentified;g__unidentified;s__Pilea_cadierei
OTU_85	0.000217315716272601	4.34631432545202e-05	2.17315716272601e-05	0.000152121001390821	0	0	0	0	0	0	0	4.34631432545202e-05	0.000412899860917942	2.17315716272601e-05	4.34631432545202e-05	0.000543289290681502	0.0001086578581363	0	0	6.51947148817803e-05	2.17315716272601e-05	8.69262865090403e-05	0.000152121001390821	0.0207536509040334	0.0001086578581363	0.0001086578581363	0.000217315716272601	0	0.000152121001390821	0	2.17315716272601e-05	0.0001086578581363	2.17315716272601e-05	0	0	0	k__Fungi;p__Basidiomycota;c__unidentified;o__Sporidiobolales;f__unidentified;g__Rhodotorula;s__Rhodotorula_glutinis
OTU_86	0	0	2.17315716272601e-05	0	0	0	4.34631432545202e-05	0	0.000499826147426982	0.000847531293463143	0	0	0	8.69262865090403e-05	4.34631432545202e-05	0	0	4.34631432545202e-05	2.17315716272601e-05	0.000630215577190542	0.000304242002781641	0.000195584144645341	0.000260778859527121	0.000217315716272601	0.000195584144645341	0.000543289290681502	0.000260778859527121	0	0	4.34631432545202e-05	0.000173852573018081	0	0	0	0	0	k__Chloroplastida;p__Streptophyta;c__Liliopsida;o__Magnoliophyta;f__unidentified;g__unidentified;s__Aegilops_tauschii
OTU_87	0.00299895688456189	0.00195584144645341	0.00132562586926287	0.000977920723226704	0.0047374826147427	0.00158640472878999	0.00145601529902643	0.000195584144645341	0.000608484005563282	2.17315716272601e-05	4.34631432545202e-05	6.51947148817803e-05	0.000717141863699583	0.000282510431154381	0.0001086578581363	0.000173852573018081	0.000890994436717663	0.000152121001390821	4.34631432545202e-05	0	0.000195584144645341	0.0001086578581363	0.000673678720445063	0.000391168289290681	0.0011952364394993	0.000173852573018081	0.000217315716272601	6.51947148817803e-05	0.000521557719054242	0.000195584144645341	8.69262865090403e-05	4.34631432545202e-05	0.000369436717663421	6.51947148817803e-05	4.34631432545202e-05	0	k__Chloroplastida;p__Chlorophyta;c__Trebouxiophyceae;o__unidentified;f__unidentified;g__Phyllosiphon;s__Phyllosiphon_arisari
OTU_88	0.00271644645340751	0.00167333101529903	0.00191237830319889	0.00273817802503477	0.00162986787204451	0.00265125173852573	0.00278164116828929	0.000738873435326843	0.00399860917941586	0.00573713490959666	0.000760605006954103	0.00115177329624478	0.000695410292072323	0.000456363004172462	0.000412899860917942	0.000586752433936022	0.000412899860917942	0.000391168289290681	6.51947148817803e-05	0.000347705146036161	0.00412899860917942	0.00136908901251739	0.00113004172461752	0.00308588317107093	0.00236874130737135	0.000847531293463143	0.0172548678720445	0.000847531293463143	0.00136908901251739	0.000282510431154381	0.000478094575799722	0.000760605006954103	0.000391168289290681	0.000391168289290681	0.000804068150208623	0.000152121001390821	k__Fungi;p__Basidiomycota;c__Agaricomycetes;o__unidentified;f__unidentified;g__unidentified
OTU_89	0.000152121001390821	0.000217315716272601	0.000195584144645341	0.000260778859527121	0.00102138386648122	0.000499826147426982	0.000152121001390821	0.000369436717663421	0.000434631432545202	0.00149947844228095	0.000239047287899861	0.000195584144645341	0.00117350486787204	0.000760605006954103	0.000369436717663421	0.00104311543810848	0.001086578581363	0.000173852573018081	0.000521557719054242	0.000260778859527121	0.00923591794158553	0.00199930458970793	0.00132562586926287	0.000869262865090403	0.00482440890125174	0.00210796244784423	0.000586752433936022	0.000391168289290681	0.000456363004172462	8.69262865090403e-05	0.000478094575799722	0.000325973574408901	0.000565020862308762	0.000391168289290681	0.000130389429763561	2.17315716272601e-05	k__Fungi;p__Ascomycota;c__Sordariomycetes;o__Hypocreales;f__unidentified;g__Sarocladium;s__Sarocladium_kiliense
OTU_90	0.000434631432545202	0.000956189151599444	0.000738873435326843	0.000565020862308762	0.000804068150208623	0.000804068150208623	0.00797548678720445	0.00141255215577191	0.000239047287899861	6.51947148817803e-05	0.000565020862308762	0.00134735744089013	0.000869262865090403	0.00393341446453407	0.00173852573018081	0.00115177329624478	0.00145601529902643	0.000456363004172462	0.000565020862308762	0.000391168289290681	0.000673678720445063	0.000999652294853964	0.000434631432545202	0.000934457579972184	0.00165159944367177	0.000651947148817803	0.000586752433936022	6.51947148817803e-05	0.000260778859527121	0.000651947148817803	0.000217315716272601	0.000325973574408901	0.000521557719054242	0.000282510431154381	0.00180372044506259	0.000847531293463143	k__Fungi;p__Ascomycota;c__Taphrinomycetes;o__Taphrinales;f__Protomycetaceae;g__Protomyces;s__Protomyces_inouyei
OTU_91	6.51947148817803e-05	0	4.34631432545202e-05	8.69262865090403e-05	0.0001086578581363	0	0	0	6.51947148817803e-05	0	2.17315716272601e-05	0.000152121001390821	2.17315716272601e-05	0	2.17315716272601e-05	0.000152121001390821	0	6.51947148817803e-05	0	0.0001086578581363	0	0.0001086578581363	4.34631432545202e-05	4.34631432545202e-05	0.0001086578581363	0.0001086578581363	0.022557371349096	2.17315716272601e-05	0	6.51947148817803e-05	4.34631432545202e-05	8.69262865090403e-05	2.17315716272601e-05	4.34631432545202e-05	0	0	k__Chloroplastida;p__Chlorophyta;c__Trebouxiophyceae;o__unidentified;f__unidentified;g__Heterochlorella;s__Heterochlorella_luteoviridis
OTU_92	0.000152121001390821	6.51947148817803e-05	6.51947148817803e-05	0	8.69262865090403e-05	8.69262865090403e-05	4.34631432545202e-05	0	0	0.00352051460361613	2.17315716272601e-05	0.000217315716272601	0.000456363004172462	6.51947148817803e-05	0.000239047287899861	4.34631432545202e-05	2.17315716272601e-05	6.51947148817803e-05	0	2.17315716272601e-05	0.000152121001390821	0.000130389429763561	0.000869262865090403	0.0128868219749652	0.000999652294853964	0.00132562586926287	4.34631432545202e-05	0.000651947148817803	0.000434631432545202	8.69262865090403e-05	6.51947148817803e-05	4.34631432545202e-05	0.000956189151599444	0.000130389429763561	0.001086578581363	4.34631432545202e-05	k__Chloroplastida;p__Streptophyta;c__Embryophyta;o__Cucurbitales;f__unidentified;g__Cucumis;s__unidentified
OTU_93	0.000586752433936022	0.000412899860917942	0.000282510431154381	8.69262865090403e-05	0.000173852573018081	0.000282510431154381	0.000434631432545202	0.000239047287899861	0.00102138386648122	0.00184718358831711	4.34631432545202e-05	0.00152121001390821	0.000586752433936022	0.000282510431154381	0.000760605006954103	0.000130389429763561	0.000152121001390821	8.69262865090403e-05	0.0001086578581363	0.000173852573018081	0.000673678720445063	0.000565020862308762	0.000478094575799722	0.000695410292072323	0.00591098748261474	0.000695410292072323	0.000304242002781641	0.00375956189151599	0.000804068150208623	0.000130389429763561	0.000217315716272601	0.000239047287899861	8.69262865090403e-05	0.000347705146036161	0.000217315716272601	0.00123869958275382	k__Chloroplastida;p__Streptophyta;c__Embryophyta;o__Magnoliophyta;f__unidentified;g__unidentified;s__Camellia_sinensis
OTU_95	8.69262865090403e-05	0.0001086578581363	4.34631432545202e-05	6.51947148817803e-05	8.69262865090403e-05	0.000130389429763561	0.000152121001390821	6.51947148817803e-05	0.000543289290681502	0.00134735744089013	0.000890994436717663	0.00212969401947149	0.00204276773296245	0.000804068150208623	0.000717141863699583	0.00149947844228095	0.00123869958275382	0.000608484005563282	0.001086578581363	0.00102138386648122	0.00208623087621697	0.00154294158553547	2.17315716272601e-05	0	0	0	0	0.0001086578581363	0	2.17315716272601e-05	0	4.34631432545202e-05	6.51947148817803e-05	0	4.34631432545202e-05	0	k__Rhizaria;p__Cercozoa;c__unidentified;o__Glissomonadida;f__unidentified;g__Heteromita;s__Heteromita_globosa
OTU_96	0.000478094575799722	0.000195584144645341	8.69262865090403e-05	6.51947148817803e-05	0.0001086578581363	0.0001086578581363	0	2.17315716272601e-05	0.000282510431154381	0.000282510431154381	0.000456363004172462	0.00215142559109875	0.000869262865090403	0.000651947148817803	0.000325973574408901	0.000217315716272601	0.000651947148817803	0.0001086578581363	0.0001086578581363	0.000369436717663421	0.000130389429763561	2.17315716272601e-05	0.000565020862308762	0.000260778859527121	0.000369436717663421	0.000152121001390821	8.69262865090403e-05	0.00399860917941586	0.00278164116828929	0.000391168289290681	0.000412899860917942	0.000412899860917942	0.000608484005563282	0.000717141863699583	0.000977920723226704	0.00117350486787204	k__Fungi;p__Ascomycota;c__Sordariomycetes
OTU_97	4.34631432545202e-05	0.0001086578581363	0	0	8.69262865090403e-05	0.000195584144645341	0.000738873435326843	6.51947148817803e-05	0.0190585883171071	0.000282510431154381	0	0.00126043115438108	0.000391168289290681	0.000434631432545202	2.17315716272601e-05	4.34631432545202e-05	0.000130389429763561	6.51947148817803e-05	0.000130389429763561	0.000130389429763561	0.000217315716272601	0.000608484005563282	0.000499826147426982	0.000130389429763561	0.00423765646731572	0.0001086578581363	6.51947148817803e-05	0.00110831015299026	0.000999652294853964	8.69262865090403e-05	8.69262865090403e-05	0	4.34631432545202e-05	4.34631432545202e-05	0.00193410987482615	0	k__Animalia;p__Arthropoda;c__unidentified;o__Collembola;f__unidentified;g__unidentified
OTU_98	0.000239047287899861	0	0	0.00193410987482615	0	0	0	0	0	0	0	0	0.000217315716272601	0	0	0.00249913073713491	0	0	0	0	0.000434631432545202	0.000651947148817803	0.000586752433936022	0.000673678720445063	0.000890994436717663	0.000695410292072323	0.0056067454798331	0	0.000152121001390821	0	0	0.00217315716272601	4.34631432545202e-05	0	0	0	k__Fungi;p__Basidiomycota;c__unidentified;o__Pucciniales;f__Phragmidiaceae;g__Phragmidium;s__Phragmidium_tormentillae
OTU_99	0.0001086578581363	2.17315716272601e-05	0.000130389429763561	6.51947148817803e-05	0.000239047287899861	0.000217315716272601	0	0.0001086578581363	0.0001086578581363	0.000565020862308762	0.000412899860917942	0.000173852573018081	0.000347705146036161	0.000260778859527121	0.000195584144645341	0.000260778859527121	0.000521557719054242	0.000173852573018081	0.000651947148817803	0.000369436717663421	0.000478094575799722	0.00106484700973574	0.000521557719054242	0.000760605006954103	0.00106484700973574	0.000717141863699583	0.000282510431154381	0.000499826147426982	0.000239047287899861	4.34631432545202e-05	0.000152121001390821	8.69262865090403e-05	0.000304242002781641	0.000130389429763561	0	0.000456363004172462	k__Fungi;p__Ascomycota;c__Dothideomycetes
OTU_100	0	0.000282510431154381	0	0.0001086578581363	0.000130389429763561	0.000456363004172462	0.0001086578581363	0	2.17315716272601e-05	0.0001086578581363	0.000152121001390821	8.69262865090403e-05	8.69262865090403e-05	4.34631432545202e-05	0	8.69262865090403e-05	0.000456363004172462	0.000217315716272601	4.34631432545202e-05	6.51947148817803e-05	0.000521557719054242	0.000673678720445063	0.00465055632823366	0.00169506258692629	0.000869262865090403	0.000239047287899861	0.000412899860917942	0.000130389429763561	0.000260778859527121	0.000825799721835883	0	0.000152121001390821	0.000347705146036161	0.00239047287899861	8.69262865090403e-05	0.000478094575799722	k__Fungi;p__Basidiomycota;c__Exobasidiomycetidae;o__Malasseziales;f__unidentified;g__Malassezia;s__Malassezia_pachydermatis
OTU_101	0.000304242002781641	0.000434631432545202	0.000195584144645341	0.0001086578581363	0.000260778859527121	0.000260778859527121	0.000391168289290681	0.00180372044506259	0.000391168289290681	0.00171679415855355	0.000565020862308762	0.000738873435326843	0.000434631432545202	0.00154294158553547	0.00147774687065369	0.000260778859527121	0.000499826147426982	0.000325973574408901	0.000130389429763561	0.000369436717663421	0.00132562586926287	0.00184718358831711	0.00247739916550765	0.00165159944367177	0.00310761474269819	0.00102138386648122	0.000434631432545202	0.000804068150208623	0.000304242002781641	0.000347705146036161	0.000260778859527121	0.0001086578581363	0.000325973574408901	0.000260778859527121	0.000347705146036161	8.69262865090403e-05	k__Fungi;p__Ascomycota;c__Sordariomycetes;o__Sordariales;f__Chaetosphaeriaceae;g__Chaetosphaeria;s__Chaetosphaeria_ciliata
OTU_102	0.00223835187760779	0.000999652294853964	0.000912726008344923	0.00271644645340751	0.00102138386648122	0.00223835187760779	0.00295549374130737	0.00284683588317107	0.00176025730180807	0.000412899860917942	0.000369436717663421	6.51947148817803e-05	0.000760605006954103	0.000130389429763561	0.000608484005563282	0.000825799721835883	0.000325973574408901	0.000434631432545202	0.000956189151599444	0.000499826147426982	0.000478094575799722	0.000152121001390821	0.000456363004172462	0.000456363004172462	0.000152121001390821	0.000412899860917942	0.000608484005563282	0.000586752433936022	0.001086578581363	0.000195584144645341	0.000325973574408901	0.000999652294853964	0.000260778859527121	0.000760605006954103	0.000651947148817803	0.00173852573018081	k__Fungi;p__Basidiomycota;c__unidentified
OTU_103	0.000325973574408901	0.000651947148817803	0.000260778859527121	0.000369436717663421	0.00123869958275382	0.000825799721835883	0.00176025730180807	6.51947148817803e-05	0.000521557719054242	0.00206449930458971	0.001086578581363	0.00186891515994437	0.000456363004172462	0.00186891515994437	0.000325973574408901	0.000608484005563282	0.000651947148817803	0.000456363004172462	0.000130389429763561	0.000130389429763561	0.000369436717663421	0.000239047287899861	0.000456363004172462	0.0001086578581363	0.000391168289290681	8.69262865090403e-05	0.000130389429763561	0.00141255215577191	0.00136908901251739	0.00158640472878999	0.000152121001390821	0.000282510431154381	0.000521557719054242	0.000260778859527121	0.000673678720445063	0.000304242002781641	k__Fungi;p__Basidiomycota;c__unidentified;o__Sporidiobolales;f__unidentified;g__Rhodotorula;s__Rhodotorula_minuta
OTU_104	0.000977920723226704	0.000478094575799722	0.00160813630041725	0.0011952364394993	0.000630215577190542	0.000760605006954103	0.00165159944367177	0.000304242002781641	0.000152121001390821	0.000347705146036161	0.0063673504867872	0.000760605006954103	0.00110831015299026	0.000478094575799722	0.000695410292072323	0.00206449930458971	0.00128216272600834	0.000434631432545202	0.000173852573018081	0.000152121001390821	0.000217315716272601	0.000456363004172462	0.000369436717663421	0.000195584144645341	4.34631432545202e-05	0.000521557719054242	0.000412899860917942	0.00102138386648122	0.000608484005563282	6.51947148817803e-05	0.000456363004172462	0.000499826147426982	0.000260778859527121	0.000239047287899861	0.000347705146036161	0.000130389429763561	k__Chloroplastida;p__Chlorophyta;c__Chlorophyceae;o__unidentified;f__unidentified;g__unidentified
OTU_105	0.00152121001390821	0.000369436717663421	0.000304242002781641	0.000956189151599444	0.000239047287899861	0.00165159944367177	0.00152121001390821	0.00204276773296245	0.000347705146036161	0.000369436717663421	0.000804068150208623	0.000304242002781641	0.000304242002781641	4.34631432545202e-05	0	8.69262865090403e-05	2.17315716272601e-05	0.000152121001390821	0.000434631432545202	8.69262865090403e-05	0.000173852573018081	0.000130389429763561	0.000717141863699583	0.000543289290681502	0.000130389429763561	0.0001086578581363	0.000412899860917942	0.00215142559109875	0.00197757301808067	0.000412899860917942	0.000239047287899861	0.000847531293463143	0.000260778859527121	0.00149947844228095	0.000782336578581363	0.00371609874826147	k__Fungi;p__unidentified;c__unidentified;o__Mucorales;f__unidentified;g__Pilaira;s__Pilaira_anomala
OTU_106	4.34631432545202e-05	0.000195584144645341	0.000347705146036161	0.000347705146036161	6.51947148817803e-05	0.000347705146036161	0	8.69262865090403e-05	0.00480267732962448	0.00304242002781641	0.000152121001390821	0.000434631432545202	8.69262865090403e-05	6.51947148817803e-05	0.000260778859527121	0.000499826147426982	0.0001086578581363	0.000152121001390821	0.000217315716272601	0.000282510431154381	0.00156467315716273	0.00228181502086231	0.000630215577190542	6.51947148817803e-05	0.000825799721835883	0.000847531293463143	0.000565020862308762	0.000173852573018081	0.000130389429763561	4.34631432545202e-05	0.000260778859527121	0.000543289290681502	8.69262865090403e-05	0.000195584144645341	0	0.000173852573018081	k__Chloroplastida;p__Streptophyta;c__Embryophyta
OTU_107	0.000608484005563282	0.000434631432545202	0.00113004172461752	0.000695410292072323	0.000499826147426982	0.000608484005563282	0.00693237134909597	0.000239047287899861	0.00178198887343533	0.000869262865090403	0.000630215577190542	0.00219488873435327	0.000695410292072323	0.000673678720445063	0.00145601529902643	0.000325973574408901	0.000391168289290681	0.000195584144645341	0.000195584144645341	0.000260778859527121	0.000478094575799722	0.00121696801112656	0.00182545201668985	0.000695410292072323	0.00132562586926287	0.00325973574408901	0.00443324061196106	0.00136908901251739	0.000869262865090403	6.51947148817803e-05	0.000521557719054242	0.000130389429763561	4.34631432545202e-05	0.0001086578581363	0.000347705146036161	0.000239047287899861	k__Alveolata;p__Ciliophora;c__Spirotrichea;o__unidentified;f__unidentified;g__uncultured;s__uncultured_Oxytrichidae
OTU_108	0.000369436717663421	0.00160813630041725	0.0001086578581363	8.69262865090403e-05	6.51947148817803e-05	0.000152121001390821	0.000586752433936022	0.000217315716272601	0.000152121001390821	0	0.000260778859527121	0.000152121001390821	0.000195584144645341	0.000195584144645341	0.0001086578581363	8.69262865090403e-05	0.000195584144645341	2.17315716272601e-05	0.00126043115438108	0.000391168289290681	4.34631432545202e-05	0.000499826147426982	0.000173852573018081	0.0001086578581363	0.000782336578581363	0.000173852573018081	0.00208623087621697	2.17315716272601e-05	4.34631432545202e-05	0.000173852573018081	0	0	4.34631432545202e-05	4.34631432545202e-05	2.17315716272601e-05	8.69262865090403e-05	k__Fungi;p__Ascomycota;c__Leotiomycetes
OTU_109	0.00132562586926287	0.001086578581363	0.000608484005563282	0.00126043115438108	0.0125173852573018	0.00104311543810848	0.000304242002781641	0.000173852573018081	0.00147774687065369	0.00228181502086231	0.000912726008344923	0.00215142559109875	0.000738873435326843	0.00347705146036161	0.000347705146036161	0.00182545201668985	0.00186891515994437	0.000673678720445063	0.000195584144645341	0.000499826147426982	0.000434631432545202	0.000130389429763561	0.000369436717663421	0.000152121001390821	0.000478094575799722	0.0001086578581363	0.000325973574408901	8.69262865090403e-05	0.000347705146036161	0.000651947148817803	8.69262865090403e-05	0.000456363004172462	0.00176025730180807	0.000217315716272601	0	2.17315716272601e-05	k__Fungi;p__Basidiomycota;c__Tremellomycetidae;o__Tremellales;f__unidentified;g__Cryptococcus;s__Cryptococcus_carnescens
OTU_110	0.000869262865090403	0.00160813630041725	0.00152121001390821	0.00104311543810848	0.00436804589707928	0.00169506258692629	0.00519384561891516	0.000565020862308762	0.005932719054242	0.00541116133518776	0.00117350486787204	0.000847531293463143	0.000869262865090403	0.00158640472878999	0.00147774687065369	0.000608484005563282	0.00176025730180807	0.000543289290681502	0.000391168289290681	0.000825799721835883	0.00134735744089013	0.00162986787204451	0.00202103616133519	0.00289029902642559	0.0142559109874826	0.00271644645340751	0.00134735744089013	0.00180372044506259	0.00126043115438108	0.00167333101529903	0.000608484005563282	0.000369436717663421	0.00149947844228095	0.000760605006954103	0.00102138386648122	0.00180372044506259	k__Fungi;p__Ascomycota;c__Eurotiomycetes;o__Eurotiales;f__Trichocomaceae;g__Aspergillus
OTU_111	0.000412899860917942	0.000217315716272601	0.000391168289290681	0.000239047287899861	8.69262865090403e-05	0.000217315716272601	0.0001086578581363	0.0001086578581363	6.51947148817803e-05	0.000239047287899861	0.000412899860917942	6.51947148817803e-05	0.000391168289290681	4.34631432545202e-05	8.69262865090403e-05	8.69262865090403e-05	6.51947148817803e-05	0	0	2.17315716272601e-05	0.00215142559109875	0.00352051460361613	0.000304242002781641	0.000369436717663421	0.000152121001390821	0.000391168289290681	0.00245566759388039	0.00325973574408901	0.00176025730180807	0.00113004172461752	0.000173852573018081	0.000260778859527121	8.69262865090403e-05	0.000195584144645341	0	2.17315716272601e-05	k__Chloroplastida;p__Streptophyta
OTU_112	0.000347705146036161	0.000304242002781641	0.000260778859527121	0.000412899860917942	0.000347705146036161	0.000412899860917942	0.00176025730180807	0.000478094575799722	0.000173852573018081	0.004846140472879	0.000760605006954103	0.00102138386648122	0.000478094575799722	0.000717141863699583	0.000434631432545202	0.000630215577190542	0.000456363004172462	0.000369436717663421	0.000217315716272601	0.000152121001390821	0.000434631432545202	0.000999652294853964	0.000217315716272601	0.000195584144645341	0.000651947148817803	0.000673678720445063	0.000651947148817803	0.00117350486787204	0.000586752433936022	0.000304242002781641	0.000478094575799722	0.000195584144645341	0.000478094575799722	0.000565020862308762	0.00134735744089013	0.000499826147426982	k__Fungi;p__Basidiomycota;c__Tremellomycetidae;o__Tremellales;f__unidentified;g__Derxomyces;s__Derxomyces_pseudoschimicola
OTU_113	0.000760605006954103	0.000260778859527121	8.69262865090403e-05	0.000195584144645341	0.000717141863699583	0.000173852573018081	0.000173852573018081	2.17315716272601e-05	6.51947148817803e-05	8.69262865090403e-05	0.000977920723226704	0.000956189151599444	0.000434631432545202	0.000195584144645341	0.000152121001390821	0.000586752433936022	0.000586752433936022	0.000217315716272601	0.0001086578581363	0.000173852573018081	0	4.34631432545202e-05	0	0.000304242002781641	2.17315716272601e-05	0	0.000152121001390821	4.34631432545202e-05	0.000239047287899861	0.000391168289290681	6.51947148817803e-05	0.000260778859527121	0.00412899860917942	0.000282510431154381	0.000586752433936022	6.51947148817803e-05	k__Fungi;p__Basidiomycota;c__Tremellomycetidae;o__Tremellales;f__unidentified;g__Asterotremella;s__Asterotremella_humicola
OTU_114	0.00469401947148818	0.00280337273991655	0.00814933936022253	0.00480267732962448	0.00371609874826147	0.00304242002781641	0.00536769819193324	0.00386821974965229	0.00347705146036161	0.00273817802503477	0.00171679415855355	0.00165159944367177	0.00252086230876217	0.00178198887343533	0.00149947844228095	0.00199930458970793	0.00147774687065369	0.000391168289290681	0.000152121001390821	0.000391168289290681	0.00154294158553547	0.00130389429763561	0.0135605006954103	0.00343358831710709	0.00304242002781641	0.00280337273991655	0.00645427677329624	0.00206449930458971	0.00243393602225313	0.000673678720445063	0.000651947148817803	0.001086578581363	0.00428111961057024	0.000521557719054242	0.00252086230876217	0.000586752433936022	k__Chloroplastida;p__Chlorophyta;c__Trebouxiophyceae;o__unidentified;f__unidentified;g__Pseudomarvania;s__Pseudomarvania_ampulliformis
OTU_115	0.000673678720445063	0.000456363004172462	0.000608484005563282	0.000391168289290681	0.000543289290681502	0.00130389429763561	0.000412899860917942	0.000152121001390821	0.000847531293463143	0.00104311543810848	0.000999652294853964	0.000325973574408901	0.000630215577190542	0.000478094575799722	0.000695410292072323	0.000912726008344923	0.000565020862308762	0.000434631432545202	0.000478094575799722	0.000673678720445063	0.00634561891515994	0.00543289290681502	0.00154294158553547	0.00204276773296245	0.00265125173852573	0.00360744089012517	0.00143428372739917	0.000738873435326843	0.00115177329624478	0.000260778859527121	0.000630215577190542	0.000412899860917942	0.000347705146036161	0.000825799721835883	0.00199930458970793	0.00104311543810848	k__Fungi;p__Ascomycota;c__Dothideomycetes;o__Pleosporales
OTU_116	0.00358570931849791	0.00210796244784423	0.00310761474269819	0.00217315716272601	0.00104311543810848	0.00113004172461752	0.00597618219749652	0.000847531293463143	0.00306415159944367	0.00202103616133519	0.00165159944367177	0.00121696801112656	0.00180372044506259	0.00156467315716273	0.00241220445062587	0.00126043115438108	0.00139082058414465	0.000173852573018081	0.000239047287899861	0.000412899860917942	0.000565020862308762	0.00134735744089013	0.00110831015299026	0.000130389429763561	0.000760605006954103	0.000717141863699583	0.000999652294853964	0.00280337273991655	0.000217315716272601	6.51947148817803e-05	0.0001086578581363	0.000325973574408901	0.000304242002781641	0	0.00136908901251739	0.000239047287899861	k__Rhizaria;p__Cercozoa;c__Thecofilosea;o__Amb-18S-431;f__unidentified;g__unidentified;s__uncultured_eukaryote
OTU_117	0.0011952364394993	0.000630215577190542	0.000956189151599444	0.000804068150208623	0.000825799721835883	0.000869262865090403	0.00141255215577191	0.000695410292072323	0.000717141863699583	0.000325973574408901	0.00132562586926287	0.00141255215577191	0.000695410292072323	0.000173852573018081	0.000434631432545202	0.001086578581363	0.000630215577190542	0.000391168289290681	0.000195584144645341	0.000391168289290681	0.000934457579972184	0.000391168289290681	0.000412899860917942	0.00104311543810848	0.000391168289290681	0.000651947148817803	0.000412899860917942	0.00121696801112656	0.000499826147426982	0.000130389429763561	0.000456363004172462	0.000391168289290681	0.000434631432545202	0.000152121001390821	0.000825799721835883	0.000195584144645341	k__Fungi;p__Ascomycota;c__Sordariomycetes;o__Sordariales;f__Chaetomiaceae
OTU_118	0.00245566759388039	0.00139082058414465	0.00186891515994437	0.00217315716272601	0.00121696801112656	0.00215142559109875	0.00184718358831711	0.000890994436717663	0.00147774687065369	0.0001086578581363	0.00501999304589708	0.000282510431154381	0.000239047287899861	6.51947148817803e-05	8.69262865090403e-05	0.000695410292072323	0.0001086578581363	6.51947148817803e-05	2.17315716272601e-05	6.51947148817803e-05	0.000239047287899861	0.00510691933240612	8.69262865090403e-05	0	2.17315716272601e-05	6.51947148817803e-05	6.51947148817803e-05	2.17315716272601e-05	0.000130389429763561	0	4.34631432545202e-05	2.17315716272601e-05	4.34631432545202e-05	8.69262865090403e-05	0.000977920723226704	0	k__Stramenopiles;p__Diatomea;c__Bacillariophyceae;o__unidentified;f__unidentified;g__Navicula
OTU_119	0.000521557719054242	0.000434631432545202	0.000456363004172462	0.000347705146036161	0.000825799721835883	0.000651947148817803	0.00310761474269819	6.51947148817803e-05	0.000239047287899861	0.00178198887343533	0.000152121001390821	0.00110831015299026	0.000130389429763561	8.69262865090403e-05	0.000152121001390821	0.000152121001390821	0.000130389429763561	8.69262865090403e-05	4.34631432545202e-05	0.000130389429763561	0.000130389429763561	4.34631432545202e-05	0.000130389429763561	4.34631432545202e-05	8.69262865090403e-05	6.51947148817803e-05	0.000130389429763561	0.000282510431154381	0.000565020862308762	0.000195584144645341	0.000152121001390821	0.000586752433936022	0.00117350486787204	0.000738873435326843	0.00295549374130737	0.000586752433936022	k__Fungi;p__Basidiomycota;c__Tremellomycetidae;o__Filobasidiales;f__Filobasidiaceae;g__unidentified;s__uncultured_fungus
OTU_120	6.51947148817803e-05	0.000347705146036161	0.0001086578581363	6.51947148817803e-05	0.000260778859527121	0.000391168289290681	0.00162986787204451	2.17315716272601e-05	0.0001086578581363	0.00241220445062587	6.51947148817803e-05	6.51947148817803e-05	8.69262865090403e-05	0.0001086578581363	6.51947148817803e-05	0.000152121001390821	0.000152121001390821	0.0001086578581363	0	4.34631432545202e-05	0.000630215577190542	0.000673678720445063	0.000369436717663421	0.000130389429763561	0.000847531293463143	0.000412899860917942	0.000217315716272601	8.69262865090403e-05	4.34631432545202e-05	4.34631432545202e-05	6.51947148817803e-05	8.69262865090403e-05	0.000130389429763561	0.0001086578581363	2.17315716272601e-05	8.69262865090403e-05	k__Fungi;p__Ascomycota
OTU_121	4.34631432545202e-05	0.0130606745479833	0.0001086578581363	2.17315716272601e-05	0	0.000130389429763561	0	0	4.34631432545202e-05	0	2.17315716272601e-05	2.17315716272601e-05	0	8.69262865090403e-05	0	6.51947148817803e-05	6.51947148817803e-05	0	0	0	2.17315716272601e-05	4.34631432545202e-05	0	0	4.34631432545202e-05	0	0	0	0	6.51947148817803e-05	0	0	0.00434631432545202	0	0	0	k__Eukaryota;p__RT5iin25;c__unidentified;o__unidentified;f__unidentified;g__unidentified;s__uncultured_freshwater_eukaryote
OTU_122	0.000847531293463143	0.000260778859527121	0.000369436717663421	0.000782336578581363	0.000543289290681502	0.000130389429763561	0.000869262865090403	0	0.0001086578581363	0.000260778859527121	0.00212969401947149	0.000586752433936022	0.00167333101529903	0.000586752433936022	0.000804068150208623	0.00191237830319889	0.00136908901251739	0.000347705146036161	0.000130389429763561	0.000325973574408901	8.69262865090403e-05	6.51947148817803e-05	8.69262865090403e-05	0.000304242002781641	8.69262865090403e-05	8.69262865090403e-05	0.000434631432545202	8.69262865090403e-05	0.000369436717663421	4.34631432545202e-05	8.69262865090403e-05	0.000239047287899861	0.000239047287899861	4.34631432545202e-05	6.51947148817803e-05	0	k__Chloroplastida;p__Chlorophyta;c__Chlorophyceae;o__unidentified;f__unidentified;g__Monoraphidium;s__Monoraphidium_contortum
OTU_123	0.000673678720445063	0.00123869958275382	0.000825799721835883	0.000695410292072323	0.00126043115438108	0.000977920723226704	0.000260778859527121	6.51947148817803e-05	0.00960535465924896	4.34631432545202e-05	0.0001086578581363	0.00102138386648122	0.000456363004172462	0.000325973574408901	0.00417246175243394	0.000260778859527121	0.0001086578581363	0.000195584144645341	4.34631432545202e-05	0.000217315716272601	0.000195584144645341	0.000630215577190542	0.00126043115438108	0.000325973574408901	0.00162986787204451	0.000847531293463143	0.000195584144645341	6.51947148817803e-05	0.000391168289290681	8.69262865090403e-05	0.000369436717663421	0.000152121001390821	0.000890994436717663	0.000217315716272601	6.51947148817803e-05	0.000478094575799722	k__Chloroplastida;p__Chlorophyta;c__Trebouxiophyceae;o__unidentified;f__unidentified;g__Dictyochloropsis;s__Dictyochloropsis_symbiontica
OTU_124	0.00102138386648122	0.000999652294853964	0.000890994436717663	0.00115177329624478	0.000760605006954103	0.000521557719054242	0.000543289290681502	0.000282510431154381	0.000565020862308762	0.000869262865090403	0.000456363004172462	0.00113004172461752	0.00171679415855355	0.000912726008344923	0.00208623087621697	0.000956189151599444	0.00123869958275382	0.000695410292072323	0.000412899860917942	0.000565020862308762	0.00204276773296245	0.000890994436717663	0.000760605006954103	0.00132562586926287	0.00315107788595271	0.00386821974965229	0.00334666203059805	0.000173852573018081	0.000847531293463143	0.000239047287899861	0.000869262865090403	0.000804068150208623	0.000369436717663421	0.000565020862308762	0.000804068150208623	0.000152121001390821	k__Fungi;p__Ascomycota;c__Sordariomycetes;o__Diaporthales;f__Diaporthaceae;g__Phomopsis;s__Diaporthe_amygdali
OTU_125	0.000456363004172462	0.000304242002781641	0.000130389429763561	0.000282510431154381	0.000239047287899861	0.000260778859527121	4.34631432545202e-05	0.000717141863699583	6.51947148817803e-05	0.00384648817802503	0.00115177329624478	0.00134735744089013	0.000412899860917942	0.00147774687065369	0.000304242002781641	0.000825799721835883	0.000239047287899861	0.000347705146036161	0.000173852573018081	0.000152121001390821	6.51947148817803e-05	0.000239047287899861	0.000195584144645341	6.51947148817803e-05	0.000434631432545202	6.51947148817803e-05	0.000130389429763561	0.00106484700973574	0.000173852573018081	0.000239047287899861	6.51947148817803e-05	0.000325973574408901	6.51947148817803e-05	0.000195584144645341	0.000282510431154381	0.000239047287899861	k__Fungi;p__Basidiomycota;c__unidentified;o__Erythrobasidiales;f__unidentified;g__unidentified;s__Erythrobasidium_hasegawianum
OTU_126	0.000956189151599444	0.000999652294853964	0.000586752433936022	0.000651947148817803	0.000543289290681502	0.000651947148817803	0.00239047287899861	8.69262865090403e-05	0.0173417941585535	0.000152121001390821	0.000152121001390821	0.000412899860917942	0.000890994436717663	0.000325973574408901	0.000130389429763561	0.000456363004172462	0.000195584144645341	0.000217315716272601	6.51947148817803e-05	0.000651947148817803	0.000434631432545202	0.000347705146036161	0.00143428372739917	0.000325973574408901	0.000999652294853964	0.000782336578581363	0.000412899860917942	0.000478094575799722	0.000869262865090403	0.000369436717663421	0.000195584144645341	0.000347705146036161	0.000173852573018081	0.000217315716272601	0.00102138386648122	0.00156467315716273	k__Chloroplastida
OTU_127	4.34631432545202e-05	0.000239047287899861	8.69262865090403e-05	8.69262865090403e-05	0.0001086578581363	0.000456363004172462	2.17315716272601e-05	6.51947148817803e-05	4.34631432545202e-05	0.000521557719054242	0.001086578581363	0.00156467315716273	0.000717141863699583	0.00293376216968011	0.000282510431154381	0.000782336578581363	0.0011952364394993	0.000260778859527121	0.000673678720445063	0.000282510431154381	0.00434631432545202	0.000347705146036161	0.0001086578581363	0.000152121001390821	0.000456363004172462	0.000260778859527121	0.000217315716272601	0.000130389429763561	0.000282510431154381	0.000434631432545202	0.000217315716272601	0.0001086578581363	4.34631432545202e-05	0.0001086578581363	0.000717141863699583	0.0001086578581363	k__Fungi;p__Ascomycota;c__Sordariomycetes;o__Hypocreales;f__unidentified;g__Acremonium;s__Acremonium_radiatum
OTU_128	0.00110831015299026	0.000956189151599444	0.000673678720445063	0.00123869958275382	0.000912726008344923	0.00113004172461752	0.000217315716272601	0.000347705146036161	0.000695410292072323	0.00154294158553547	0.000304242002781641	0.000195584144645341	0.000304242002781641	0.000173852573018081	0.000195584144645341	0.000282510431154381	0.000260778859527121	0.000239047287899861	6.51947148817803e-05	0.000152121001390821	0.00178198887343533	4.34631432545202e-05	8.69262865090403e-05	6.51947148817803e-05	8.69262865090403e-05	0	6.51947148817803e-05	6.51947148817803e-05	0.0001086578581363	0.000173852573018081	0	0.000260778859527121	0.000608484005563282	0.000152121001390821	0.000282510431154381	0.000608484005563282	k__Fungi;p__Ascomycota;c__Pezizomycetes;o__Pezizales;f__Ascobolaceae;g__uncultured;s__uncultured_eukaryote
OTU_129	0.00223835187760779	0.00147774687065369	0.00117350486787204	0.00191237830319889	0.00158640472878999	0.00210796244784423	0.00286856745479833	0.000890994436717663	0.00104311543810848	0.000412899860917942	0.000695410292072323	0.00128216272600834	0.000651947148817803	0.0001086578581363	0.000152121001390821	0.000391168289290681	0.000217315716272601	8.69262865090403e-05	0.0001086578581363	0.000217315716272601	0.000434631432545202	0.000434631432545202	0.00143428372739917	0.000152121001390821	0.000304242002781641	0.000260778859527121	0.000260778859527121	0.00171679415855355	0.000499826147426982	0.000195584144645341	0.000347705146036161	0.000565020862308762	0.000304242002781641	0.000391168289290681	0.000565020862308762	0.000239047287899861	k__Fungi;p__unidentified;c__unidentified;o__unidentified;f__Mortierellaceae;g__Mortierella;s__uncultured_Eimeriidae
OTU_130	0.000521557719054242	0.000391168289290681	0.0001086578581363	0.000130389429763561	0.000347705146036161	0.000412899860917942	8.69262865090403e-05	2.17315716272601e-05	0.000173852573018081	0.000630215577190542	0.000673678720445063	0.00195584144645341	0.000565020862308762	0.000847531293463143	0.00197757301808067	0.000304242002781641	0.000738873435326843	0.000391168289290681	0.000130389429763561	0.000304242002781641	4.34631432545202e-05	2.17315716272601e-05	0.000217315716272601	0.000152121001390821	0.000217315716272601	4.34631432545202e-05	6.51947148817803e-05	0.00136908901251739	0.000977920723226704	0.000173852573018081	0.000173852573018081	0.000195584144645341	0.000304242002781641	0.000282510431154381	0.00173852573018081	8.69262865090403e-05	k__Fungi;p__Ascomycota
OTU_131	0.000543289290681502	0.000152121001390821	0.000152121001390821	0.000434631432545202	0.000173852573018081	0.000325973574408901	0.000217315716272601	6.51947148817803e-05	0.000130389429763561	0.00130389429763561	0.000521557719054242	0.000869262865090403	0.000217315716272601	0.000260778859527121	0.000217315716272601	0.000282510431154381	0.000130389429763561	8.69262865090403e-05	0	4.34631432545202e-05	0.000325973574408901	0.000804068150208623	0.00239047287899861	0.00178198887343533	0.00199930458970793	0.000412899860917942	0.000260778859527121	0.00478094575799722	0.001086578581363	0.000456363004172462	0.000325973574408901	0.000412899860917942	0.000260778859527121	0.000282510431154381	0.00110831015299026	0.000760605006954103	k__Fungi;p__Ascomycota;c__Lecanoromycetes;o__unidentified;f__unidentified;g__unidentified;s__Bacidina_arnoldiana
OTU_132	8.69262865090403e-05	0	4.34631432545202e-05	8.69262865090403e-05	2.17315716272601e-05	4.34631432545202e-05	0	2.17315716272601e-05	0	0.000217315716272601	0.0121262169680111	8.69262865090403e-05	2.17315716272601e-05	0	2.17315716272601e-05	0.000804068150208623	0.000304242002781641	0	2.17315716272601e-05	0	2.17315716272601e-05	0.000369436717663421	0	0	0	0	2.17315716272601e-05	4.34631432545202e-05	8.69262865090403e-05	2.17315716272601e-05	0	8.69262865090403e-05	2.17315716272601e-05	6.51947148817803e-05	0	4.34631432545202e-05	k__Stramenopiles;p__Diatomea;c__Bacillariophyceae;o__unidentified;f__unidentified;g__Amphora;s__Amphora_montana
OTU_133	0.000434631432545202	0.000152121001390821	0.000369436717663421	0.000152121001390821	6.51947148817803e-05	0.0001086578581363	0.000608484005563282	0.000608484005563282	2.17315716272601e-05	0.000152121001390821	0.000152121001390821	6.51947148817803e-05	0.000260778859527121	8.69262865090403e-05	0.000282510431154381	4.34631432545202e-05	4.34631432545202e-05	4.34631432545202e-05	0	4.34631432545202e-05	0.000347705146036161	0.00139082058414465	0.000608484005563282	0.000304242002781641	0.00167333101529903	0.000934457579972184	0.000499826147426982	0	0.000282510431154381	0.0001086578581363	0.000325973574408901	0.000239047287899861	8.69262865090403e-05	0.0001086578581363	0	4.34631432545202e-05	k__Chloroplastida;p__Chlorophyta;c__Trebouxiophyceae;o__unidentified;f__unidentified
OTU_134	0.000195584144645341	0.000130389429763561	0.000152121001390821	0.000391168289290681	0.000478094575799722	0.000152121001390821	0.000130389429763561	0.000565020862308762	6.51947148817803e-05	0.00271644645340751	0.000347705146036161	0.000956189151599444	0.000673678720445063	0.000804068150208623	0.000586752433936022	0.00158640472878999	0.000586752433936022	0.000521557719054242	0.000173852573018081	0.000239047287899861	0.000412899860917942	0.0001086578581363	0.000608484005563282	0.000152121001390821	0.000391168289290681	0.000282510431154381	0.000586752433936022	0.000869262865090403	0.000651947148817803	0.000391168289290681	0.000304242002781641	0.00110831015299026	0.000565020862308762	0.000586752433936022	0.000195584144645341	0.000304242002781641	k__Fungi;p__Basidiomycota;c__Tremellomycetidae;o__Tremellales;f__unidentified
OTU_135	8.69262865090403e-05	0	0.000173852573018081	8.69262865090403e-05	4.34631432545202e-05	8.69262865090403e-05	4.34631432545202e-05	0	2.17315716272601e-05	0	0	2.17315716272601e-05	0	2.17315716272601e-05	6.51947148817803e-05	4.34631432545202e-05	4.34631432545202e-05	0	0	0.000195584144645341	6.51947148817803e-05	8.69262865090403e-05	0.000369436717663421	8.69262865090403e-05	0.0001086578581363	8.69262865090403e-05	6.51947148817803e-05	0	0	0	2.17315716272601e-05	0	0	0	0.000173852573018081	2.17315716272601e-05	k__Fungi;p__unidentified;c__unidentified;o__Zoopagales;f__unidentified;g__Piptocephalis;s__Piptocephalis_corymbifera
OTU_136	0.000195584144645341	0.000217315716272601	8.69262865090403e-05	8.69262865090403e-05	0.000195584144645341	0.000521557719054242	4.34631432545202e-05	0	0.000195584144645341	4.34631432545202e-05	0.000173852573018081	0.000543289290681502	0.0001086578581363	0.000130389429763561	0	2.17315716272601e-05	6.51947148817803e-05	0.0001086578581363	0	4.34631432545202e-05	0.000239047287899861	0.000804068150208623	0.000869262865090403	0.00115177329624478	0.00110831015299026	0.000890994436717663	0.000152121001390821	0.000282510431154381	0.000325973574408901	8.69262865090403e-05	8.69262865090403e-05	8.69262865090403e-05	0.000738873435326843	0.000130389429763561	0.000152121001390821	0	k__Chloroplastida;p__Chlorophyta;c__Trebouxiophyceae;o__unidentified;f__unidentified;g__Kalinella;s__Kalinella_bambusicola
OTU_137	0.000934457579972184	0.000217315716272601	6.51947148817803e-05	4.34631432545202e-05	4.34631432545202e-05	0	2.17315716272601e-05	0.000434631432545202	4.34631432545202e-05	4.34631432545202e-05	6.51947148817803e-05	4.34631432545202e-05	0.00160813630041725	0.000499826147426982	0	0.000217315716272601	0.000130389429763561	2.17315716272601e-05	0.000369436717663421	0.000152121001390821	0.000478094575799722	0.000847531293463143	0.000217315716272601	0.00308588317107093	0.00160813630041725	0.000825799721835883	0.00121696801112656	2.17315716272601e-05	0.00121696801112656	0.000391168289290681	0	2.17315716272601e-05	2.17315716272601e-05	4.34631432545202e-05	6.51947148817803e-05	0.000304242002781641	k__Fungi;p__Basidiomycota;c__Agaricomycetes;o__Corticiales;f__Corticiaceae;g__Hyphodontia;s__Hyphodontia_rimosissima
OTU_138	0.000565020862308762	0.000391168289290681	0.000152121001390821	0.000304242002781641	0.000304242002781641	0.000239047287899861	4.34631432545202e-05	0.00128216272600834	6.51947148817803e-05	0.000130389429763561	0.000195584144645341	0.000608484005563282	0.00110831015299026	0.000586752433936022	0.000195584144645341	0.000847531293463143	0.000673678720445063	0.000260778859527121	0.000130389429763561	0.000152121001390821	8.69262865090403e-05	0.000260778859527121	0.000152121001390821	0.000239047287899861	0.000260778859527121	2.17315716272601e-05	0.000217315716272601	0.00154294158553547	0.000478094575799722	0.000499826147426982	0.000173852573018081	0.000478094575799722	0.000260778859527121	0.000282510431154381	0.000673678720445063	0.000391168289290681	k__Fungi;p__Ascomycota;c__Lecanoromycetes;o__unidentified;f__unidentified;g__unidentified;s__Micarea_adnata
OTU_139	0	0	0	4.34631432545202e-05	6.51947148817803e-05	4.34631432545202e-05	0	0	0.000608484005563282	0.00171679415855355	0	0.000173852573018081	0	8.69262865090403e-05	0.000586752433936022	0.000130389429763561	4.34631432545202e-05	0	0	0	0	8.69262865090403e-05	6.51947148817803e-05	0	6.51947148817803e-05	4.34631432545202e-05	0.00954015994436718	0	0	0	2.17315716272601e-05	0	0	0	0	0	k__Animalia
OTU_140	0.000782336578581363	0.000999652294853964	0.000651947148817803	0.00104311543810848	0.000804068150208623	0.0011952364394993	0.00212969401947149	0.00113004172461752	0.000499826147426982	0.00115177329624478	0.000673678720445063	0.000847531293463143	0.000456363004172462	0.000825799721835883	0.000651947148817803	0.000804068150208623	0.000760605006954103	0.000738873435326843	0.000260778859527121	0.000543289290681502	0.000369436717663421	0.000304242002781641	0.000543289290681502	0.000347705146036161	0.000782336578581363	0.000456363004172462	0.000456363004172462	0.000282510431154381	0.000760605006954103	0.000412899860917942	0.000543289290681502	0.000695410292072323	0.000977920723226704	0.000412899860917942	0.000717141863699583	0.000260778859527121	k__Fungi;p__Basidiomycota;c__Tremellomycetidae;o__Tremellales;f__unidentified;g__Dioszegia
OTU_141	6.51947148817803e-05	8.69262865090403e-05	0	0	2.17315716272601e-05	0	0	0	4.34631432545202e-05	0	0	0.000130389429763561	8.69262865090403e-05	0	0	2.17315716272601e-05	2.17315716272601e-05	0	0	0	0.000369436717663421	0.000347705146036161	0.00695410292072323	0.00467228789986092	0.000152121001390821	0.000217315716272601	0.000239047287899861	0.000152121001390821	8.69262865090403e-05	2.17315716272601e-05	0	2.17315716272601e-05	2.17315716272601e-05	0	0	0	k__Fungi;p__Chytridiomycota;c__Chytridiomycetes
OTU_142	0	0	0	0	0	0	0	0.000369436717663421	0	0.0001086578581363	0.000152121001390821	0	0	0	0	0	0	0	0.000152121001390821	0	0	0	0	0	0	0	0	0.000173852573018081	0.000195584144645341	4.34631432545202e-05	4.34631432545202e-05	0.000173852573018081	0.0001086578581363	8.69262865090403e-05	6.51947148817803e-05	0.0229050764951321	k__Fungi;p__Chytridiomycota;c__Chytridiomycetes;o__Chytridiales;f__unidentified
OTU_143	8.69262865090403e-05	0.0001086578581363	6.51947148817803e-05	0.000304242002781641	6.51947148817803e-05	0.0001086578581363	8.69262865090403e-05	4.34631432545202e-05	0.000130389429763561	0.000130389429763561	4.34631432545202e-05	0.000282510431154381	0.000391168289290681	6.51947148817803e-05	8.69262865090403e-05	0.000760605006954103	0	2.17315716272601e-05	4.34631432545202e-05	0.000282510431154381	0.00126043115438108	0.00256432545201669	0.000304242002781641	0.000217315716272601	0.000412899860917942	0.000239047287899861	0.00241220445062587	4.34631432545202e-05	2.17315716272601e-05	0	0	8.69262865090403e-05	0	0	0	0	k__Stramenopiles;p__unidentified;c__Chrysophyceae
OTU_144	0.000260778859527121	8.69262865090403e-05	4.34631432545202e-05	2.17315716272601e-05	6.51947148817803e-05	4.34631432545202e-05	6.51947148817803e-05	2.17315716272601e-05	4.34631432545202e-05	0.000282510431154381	0.0001086578581363	0.000217315716272601	0.000586752433936022	0.000369436717663421	0.000934457579972184	0.000260778859527121	0.000152121001390821	0.000130389429763561	0.000130389429763561	6.51947148817803e-05	0.000369436717663421	0.000304242002781641	0.000543289290681502	0.000173852573018081	0.000630215577190542	0.000282510431154381	0.000260778859527121	0.0001086578581363	0.000369436717663421	6.51947148817803e-05	0.0001086578581363	6.51947148817803e-05	6.51947148817803e-05	6.51947148817803e-05	0.000239047287899861	8.69262865090403e-05	k__Fungi;p__Basidiomycota;c__Exobasidiomycetidae;o__unidentified;f__unidentified;g__unidentified;s__Tilletiopsis_pallescens
OTU_145	0	0	8.69262865090403e-05	0	0	0	0	6.51947148817803e-05	2.17315716272601e-05	4.34631432545202e-05	2.17315716272601e-05	0.000391168289290681	0.000152121001390821	0.000130389429763561	0.00591098748261474	0.000282510431154381	4.34631432545202e-05	0	0.00110831015299026	6.51947148817803e-05	0.000173852573018081	0.000173852573018081	0.000586752433936022	4.34631432545202e-05	2.17315716272601e-05	0.00239047287899861	0.000173852573018081	0.0001086578581363	0	0	0.000260778859527121	0	0	2.17315716272601e-05	0	0.000217315716272601	k__Animalia;p__Arthropoda;c__Arachnida;o__unidentified;f__unidentified;g__unidentified
OTU_146	0.000456363004172462	0.000521557719054242	0.000543289290681502	0.00104311543810848	0.000630215577190542	0.00145601529902643	8.69262865090403e-05	0	0.000217315716272601	6.51947148817803e-05	0.00747566063977747	0.000173852573018081	0.000304242002781641	0.000217315716272601	0.000217315716272601	0.00197757301808067	0.000304242002781641	0.000369436717663421	4.34631432545202e-05	6.51947148817803e-05	2.17315716272601e-05	0.000369436717663421	0.000195584144645341	0.0001086578581363	2.17315716272601e-05	8.69262865090403e-05	0.000586752433936022	0.000825799721835883	0.000260778859527121	8.69262865090403e-05	2.17315716272601e-05	0.000478094575799722	0.0001086578581363	0.000152121001390821	0.000391168289290681	0	k__Chloroplastida;p__Chlorophyta;c__Chlorophyceae;o__unidentified;f__unidentified;g__Chlamydomonas
OTU_147	0.00132562586926287	0.00136908901251739	0.000804068150208623	0.00136908901251739	0.00113004172461752	0.00167333101529903	0.00113004172461752	0.000565020862308762	0.00123869958275382	0.000217315716272601	0.00197757301808067	0.000651947148817803	0.000152121001390821	8.69262865090403e-05	8.69262865090403e-05	0.000282510431154381	0.000217315716272601	0.000130389429763561	0.000130389429763561	0.0001086578581363	0.0001086578581363	0.00275990959666203	0.000608484005563282	8.69262865090403e-05	0	4.34631432545202e-05	6.51947148817803e-05	0.000499826147426982	8.69262865090403e-05	4.34631432545202e-05	4.34631432545202e-05	0.000260778859527121	4.34631432545202e-05	6.51947148817803e-05	2.17315716272601e-05	8.69262865090403e-05	k__Fungi;p__Chytridiomycota;c__Chytridiomycetes;o__Rhizophydiales;f__unidentified;g__uncultured;s__uncultured_Chytridiomycota
OTU_148	6.51947148817803e-05	0	8.69262865090403e-05	0.000195584144645341	0.000260778859527121	4.34631432545202e-05	2.17315716272601e-05	0	4.34631432545202e-05	4.34631432545202e-05	0.00673678720445063	0.000173852573018081	0.000282510431154381	0.000130389429763561	0.000325973574408901	0.000173852573018081	0.000825799721835883	0.000130389429763561	2.17315716272601e-05	0	4.34631432545202e-05	0.000369436717663421	6.51947148817803e-05	2.17315716272601e-05	2.17315716272601e-05	0	8.69262865090403e-05	0	8.69262865090403e-05	4.34631432545202e-05	8.69262865090403e-05	2.17315716272601e-05	0.000195584144645341	6.51947148817803e-05	0.0001086578581363	0	k__Chloroplastida;p__Chlorophyta;c__Chlorophyceae;o__unidentified;f__unidentified;g__Chlorosarcinopsis
OTU_149	0.000217315716272601	0	2.17315716272601e-05	2.17315716272601e-05	6.51947148817803e-05	0	6.51947148817803e-05	6.51947148817803e-05	8.69262865090403e-05	4.34631432545202e-05	0.0001086578581363	0.000890994436717663	0.000217315716272601	4.34631432545202e-05	2.17315716272601e-05	0	6.51947148817803e-05	0	4.34631432545202e-05	4.34631432545202e-05	4.34631432545202e-05	4.34631432545202e-05	0.00117350486787204	0.000130389429763561	0	0.0001086578581363	0	0.00415073018080668	0.0011952364394993	0.000130389429763561	8.69262865090403e-05	0.000217315716272601	0.000195584144645341	0.000260778859527121	0.000521557719054242	0.00186891515994437	k__Fungi;p__Ascomycota
OTU_150	4.34631432545202e-05	0	4.34631432545202e-05	0	0	0.000152121001390821	0	0	0	2.17315716272601e-05	2.17315716272601e-05	4.34631432545202e-05	0.000152121001390821	0	0	8.69262865090403e-05	2.17315716272601e-05	2.17315716272601e-05	0	0.000152121001390821	8.69262865090403e-05	8.69262865090403e-05	0.000217315716272601	0.00897513908205841	0.000152121001390821	0	4.34631432545202e-05	0	4.34631432545202e-05	0	0	0	0	0	0.000391168289290681	2.17315716272601e-05	k__Animalia;p__Arthropoda;c__unidentified;o__Collembola;f__unidentified;g__unidentified
OTU_151	8.69262865090403e-05	0	0	0	0	0	0	0.000304242002781641	4.34631432545202e-05	4.34631432545202e-05	6.51947148817803e-05	6.51947148817803e-05	0.000369436717663421	0.000173852573018081	0.000217315716272601	8.69262865090403e-05	8.69262865090403e-05	0.0001086578581363	0.00239047287899861	8.69262865090403e-05	4.34631432545202e-05	0.000152121001390821	0.000195584144645341	0.00145601529902643	0.0001086578581363	0.0001086578581363	2.17315716272601e-05	2.17315716272601e-05	8.69262865090403e-05	0	0	0	0	4.34631432545202e-05	0.000260778859527121	0.000304242002781641	k__Fungi;p__Ascomycota
OTU_152	0.000456363004172462	0.000456363004172462	0.000391168289290681	0.000456363004172462	0.000260778859527121	0.000738873435326843	0.000304242002781641	0.000934457579972184	4.34631432545202e-05	0	0.000217315716272601	0.000195584144645341	0.000738873435326843	0.00106484700973574	0.000369436717663421	0.000478094575799722	0.000434631432545202	0.000217315716272601	0	0.000217315716272601	0	4.34631432545202e-05	0.000195584144645341	0.000217315716272601	0.000434631432545202	6.51947148817803e-05	0.000239047287899861	0.000456363004172462	0.000434631432545202	0.000173852573018081	8.69262865090403e-05	0.000239047287899861	0.001086578581363	6.51947148817803e-05	0	4.34631432545202e-05	k__Chloroplastida;p__Chlorophyta;c__Chlorophyceae;o__unidentified;f__unidentified;g__Pseudomuriella;s__Pseudomuriella_aurantiaca
OTU_153	0.0001086578581363	0	4.34631432545202e-05	0.000304242002781641	6.51947148817803e-05	0	0	0	0	0	0.000586752433936022	8.69262865090403e-05	0.000304242002781641	6.51947148817803e-05	8.69262865090403e-05	0.00801894993045897	0.000130389429763561	4.34631432545202e-05	8.69262865090403e-05	6.51947148817803e-05	0.000195584144645341	0.000586752433936022	0.000695410292072323	4.34631432545202e-05	6.51947148817803e-05	6.51947148817803e-05	0.000325973574408901	0	0	0	0	0.000152121001390821	0	0	2.17315716272601e-05	0	k__Stramenopiles;p__unidentified;c__Chrysophyceae;o__Chromulinales;f__unidentified;g__Spumella;s__uncultured_eukaryote
OTU_154	0.000239047287899861	0.000608484005563282	0.000586752433936022	0.000369436717663421	0.000717141863699583	0.000347705146036161	0.0001086578581363	6.51947148817803e-05	4.34631432545202e-05	0.00291203059805285	0.000956189151599444	0.00245566759388039	0.000869262865090403	0.000304242002781641	0.000478094575799722	0.000304242002781641	0.000651947148817803	0.000304242002781641	0.000391168289290681	0.000217315716272601	0.000347705146036161	0.000499826147426982	0.000369436717663421	0.0001086578581363	0.000630215577190542	0.00130389429763561	0.000304242002781641	0.000543289290681502	0.000543289290681502	0.000239047287899861	0.00367263560500695	0.000825799721835883	0.000239047287899861	0.000412899860917942	0.000717141863699583	0.000260778859527121	k__Fungi;p__Ascomycota;c__Dothideomycetes;o__Capnodiales
OTU_155	0.00182545201668985	0.00117350486787204	0.00123869958275382	0.00158640472878999	0.00123869958275382	0.00195584144645341	0.001086578581363	0.00104311543810848	0.00104311543810848	4.34631432545202e-05	0.000173852573018081	0.00245566759388039	4.34631432545202e-05	0	0	8.69262865090403e-05	0	0	0.0001086578581363	0	0	2.17315716272601e-05	0.00358570931849791	0	0	0	0	0.00265125173852573	2.17315716272601e-05	2.17315716272601e-05	4.34631432545202e-05	0.000130389429763561	6.51947148817803e-05	6.51947148817803e-05	6.51947148817803e-05	0.000239047287899861	k__Fungi;p__Chytridiomycota;c__Chytridiomycetes;o__Rhizophydiales;f__unidentified;g__uncultured;s__uncultured_eukaryote
OTU_156	0.000152121001390821	6.51947148817803e-05	0.000195584144645341	8.69262865090403e-05	0.000173852573018081	6.51947148817803e-05	0	0	0	0.0001086578581363	0.00115177329624478	0.000499826147426982	8.69262865090403e-05	0.000847531293463143	0	0.000325973574408901	0.0001086578581363	2.17315716272601e-05	2.17315716272601e-05	4.34631432545202e-05	4.34631432545202e-05	8.69262865090403e-05	0.000195584144645341	0	0	6.51947148817803e-05	0.00315107788595271	0.000478094575799722	0.000521557719054242	0.000673678720445063	6.51947148817803e-05	0	0	4.34631432545202e-05	0	0	k__Stramenopiles;p__unidentified;c__unidentified;o__Eustigmatales;f__unidentified;g__unidentified;s__Eustigmatos_magnus
OTU_157	0.000173852573018081	6.51947148817803e-05	0.000217315716272601	8.69262865090403e-05	0.000130389429763561	0.000173852573018081	0.0001086578581363	0.00654120305980529	6.51947148817803e-05	0.000565020862308762	0	0	0.000152121001390821	4.34631432545202e-05	0.00141255215577191	0	0	0	0.000130389429763561	0	0.000173852573018081	6.51947148817803e-05	0.000478094575799722	0.00184718358831711	0.00102138386648122	0.000695410292072323	0.000130389429763561	0.000565020862308762	0.000369436717663421	6.51947148817803e-05	4.34631432545202e-05	4.34631432545202e-05	6.51947148817803e-05	2.17315716272601e-05	0.000565020862308762	0.000456363004172462	k__Chloroplastida;p__Streptophyta;c__Embryophyta;o__Fabales;f__unidentified;g__unidentified;s__Phaseoleae_environmental_sample
OTU_158	0.000934457579972184	0.00180372044506259	0.000977920723226704	0.000608484005563282	0.00113004172461752	0.00121696801112656	0.000608484005563282	0.000239047287899861	0.000130389429763561	4.34631432545202e-05	0.000738873435326843	0.0001086578581363	0.000325973574408901	0.000239047287899861	0.000173852573018081	0.000325973574408901	0.000130389429763561	2.17315716272601e-05	6.51947148817803e-05	4.34631432545202e-05	2.17315716272601e-05	0.000217315716272601	0.000195584144645341	8.69262865090403e-05	0.000217315716272601	4.34631432545202e-05	6.51947148817803e-05	0.000391168289290681	0.000412899860917942	0.000130389429763561	0.000130389429763561	0.000130389429763561	0.000412899860917942	0.000130389429763561	0	0.00232527816411683	k__Chloroplastida;p__Chlorophyta;c__Chlorophyceae;o__unidentified;f__unidentified;g__unidentified;s__Pseudotetracystis_sp._NB1-VF11
OTU_159	0.0001086578581363	2.17315716272601e-05	0.000152121001390821	4.34631432545202e-05	6.51947148817803e-05	6.51947148817803e-05	0	4.34631432545202e-05	0	2.17315716272601e-05	0.000434631432545202	0.000391168289290681	2.17315716272601e-05	0.000152121001390821	0	6.51947148817803e-05	8.69262865090403e-05	0	0	0	0.000260778859527121	0.000173852573018081	0.00747566063977747	0.000217315716272601	0.000304242002781641	0.000239047287899861	0.000217315716272601	0.000347705146036161	0.000434631432545202	4.34631432545202e-05	6.51947148817803e-05	4.34631432545202e-05	0.000347705146036161	4.34631432545202e-05	0.000173852573018081	0.000760605006954103	k__Fungi;p__Ascomycota
OTU_160	0.000478094575799722	0.000173852573018081	0.000173852573018081	6.51947148817803e-05	0.000434631432545202	0.000217315716272601	4.34631432545202e-05	0.000934457579972184	0.000391168289290681	0	0	0.000586752433936022	0.000565020862308762	8.69262865090403e-05	0.000304242002781641	0.000347705146036161	0.000673678720445063	0.000130389429763561	0.000152121001390821	0.000738873435326843	0.000152121001390821	0.000130389429763561	0.000651947148817803	0.0001086578581363	0.000239047287899861	0.000195584144645341	0.000195584144645341	4.34631432545202e-05	0.000152121001390821	0	8.69262865090403e-05	6.51947148817803e-05	0.000347705146036161	6.51947148817803e-05	0.000304242002781641	0	k__Fungi;p__Ascomycota;c__Sordariomycetes;o__Microascales;f__Microascaceae;g__Scopulariopsis;s__unidentified
OTU_161	0.00197757301808067	0.000565020862308762	0.000391168289290681	0.000673678720445063	0.000608484005563282	0.000586752433936022	0.000195584144645341	0.000630215577190542	0.0001086578581363	0.00182545201668985	4.34631432545202e-05	0.000130389429763561	0.000304242002781641	0.000695410292072323	8.69262865090403e-05	0.000239047287899861	0.000304242002781641	0.0001086578581363	6.51947148817803e-05	2.17315716272601e-05	6.51947148817803e-05	6.51947148817803e-05	0.000717141863699583	0.000152121001390821	0.000195584144645341	8.69262865090403e-05	0.000173852573018081	0	0.000369436717663421	2.17315716272601e-05	6.51947148817803e-05	0.0001086578581363	0.000173852573018081	4.34631432545202e-05	0.000239047287899861	0.000869262865090403	k__Chloroplastida;p__Chlorophyta;c__Trebouxiophyceae;o__unidentified;f__unidentified;g__Auxenochlorella;s__Chlorella_sp._CCAP_211/61
OTU_162	6.51947148817803e-05	0.000195584144645341	0.000217315716272601	0.000152121001390821	0.000152121001390821	0.000130389429763561	0.000217315716272601	0.000304242002781641	0	0.000847531293463143	2.17315716272601e-05	0.000347705146036161	0.000152121001390821	0.000173852573018081	0.00121696801112656	0.00145601529902643	0.000412899860917942	6.51947148817803e-05	2.17315716272601e-05	0	0.00128216272600834	0.000434631432545202	0.00113004172461752	0.000130389429763561	0.00293376216968011	0.00104311543810848	0.000304242002781641	0.000217315716272601	0.000130389429763561	0.000130389429763561	0.000239047287899861	0.000173852573018081	8.69262865090403e-05	8.69262865090403e-05	6.51947148817803e-05	2.17315716272601e-05	k__Fungi;p__Ascomycota;c__Sordariomycetes;o__Xylariales;f__Amphisphaeriaceae;g__Truncatella;s__Truncatella_angustata
OTU_163	0	2.17315716272601e-05	4.34631432545202e-05	0	6.51947148817803e-05	2.17315716272601e-05	0	0.00123869958275382	0	0.00773643949930459	0.000999652294853964	0.000152121001390821	4.34631432545202e-05	4.34631432545202e-05	0.00312934631432545	0.000239047287899861	2.17315716272601e-05	0	0	2.17315716272601e-05	0.000173852573018081	0.000173852573018081	0.000369436717663421	0.0001086578581363	0.00113004172461752	0.000217315716272601	8.69262865090403e-05	4.34631432545202e-05	4.34631432545202e-05	0	6.51947148817803e-05	0.0001086578581363	4.34631432545202e-05	6.51947148817803e-05	0	6.51947148817803e-05	k__Alveolata;p__Ciliophora;c__Colpodea;o__Colpodida;f__unidentified;g__Bromeliothrix;s__Colpoda_sp._PRA-118
OTU_164	0	0	4.34631432545202e-05	8.69262865090403e-05	0	0	0	0	0	4.34631432545202e-05	0.000521557719054242	4.34631432545202e-05	0.000130389429763561	4.34631432545202e-05	0.0001086578581363	0.000456363004172462	4.34631432545202e-05	0	4.34631432545202e-05	0	0.000412899860917942	0.00162986787204451	0.000717141863699583	0.0001086578581363	0.000412899860917942	0.000478094575799722	0.00391168289290681	0	0	0	4.34631432545202e-05	0	4.34631432545202e-05	4.34631432545202e-05	0	0	k__Stramenopiles;p__unidentified;c__Chrysophyceae;o__Ochromonadales;f__unidentified;g__Ochromonas;s__uncultured_freshwater_eukaryote
OTU_165	0	0	0	0	2.17315716272601e-05	0	0	0	0.000695410292072323	4.34631432545202e-05	0	0.000608484005563282	0.000804068150208623	0.000239047287899861	0.000412899860917942	0.000478094575799722	0.000521557719054242	0.000260778859527121	0.000217315716272601	0.00365090403337969	2.17315716272601e-05	4.34631432545202e-05	0	4.34631432545202e-05	2.17315716272601e-05	6.51947148817803e-05	4.34631432545202e-05	0	2.17315716272601e-05	0	0	0	0	0	0	0	k__Animalia;p__Arthropoda;c__Arachnida;o__unidentified;f__unidentified;g__unidentified;s__Scheloribates_ascendens
OTU_166	0.0001086578581363	4.34631432545202e-05	0	0.0001086578581363	0	2.17315716272601e-05	0	8.69262865090403e-05	0.00176025730180807	0	0	0	6.51947148817803e-05	4.34631432545202e-05	2.17315716272601e-05	0.000391168289290681	6.51947148817803e-05	2.17315716272601e-05	4.34631432545202e-05	6.51947148817803e-05	4.34631432545202e-05	8.69262865090403e-05	2.17315716272601e-05	0	2.17315716272601e-05	6.51947148817803e-05	0.00178198887343533	0	0	0	0	0.0001086578581363	0	0	0	0	k__Fungi;p__Basidiomycota;c__Exobasidiomycetidae;o__Exobasidiales;f__Graphiolaceae;g__Graphiola;s__Graphiola_phoenicis
OTU_167	0	2.17315716272601e-05	2.17315716272601e-05	0	0	0.000152121001390821	4.34631432545202e-05	0	2.17315716272601e-05	2.17315716272601e-05	4.34631432545202e-05	6.51947148817803e-05	4.34631432545202e-05	0	6.51947148817803e-05	6.51947148817803e-05	4.34631432545202e-05	2.17315716272601e-05	0	0.000152121001390821	0.00134735744089013	0.000369436717663421	0.00202103616133519	8.69262865090403e-05	0.00134735744089013	0.000239047287899861	8.69262865090403e-05	0	8.69262865090403e-05	0	0	0	2.17315716272601e-05	6.51947148817803e-05	0.000347705146036161	0	k__Animalia;p__Annelida;c__unidentified;o__unidentified;f__Naididae;g__unidentified
OTU_168	0.000130389429763561	4.34631432545202e-05	8.69262865090403e-05	0	2.17315716272601e-05	0	0	0	0	6.51947148817803e-05	0.000304242002781641	2.17315716272601e-05	0.0001086578581363	0	0	0	0	0	0	0	0.000304242002781641	0.00358570931849791	0.000825799721835883	0.00139082058414465	0.000239047287899861	0.000282510431154381	0.000217315716272601	8.69262865090403e-05	0.000282510431154381	0.000195584144645341	0.000195584144645341	8.69262865090403e-05	0.000130389429763561	6.51947148817803e-05	8.69262865090403e-05	0	k__Fungi;p__Chytridiomycota;c__Chytridiomycetes;o__Chytridiales;f__unidentified;g__Synchytrium;s__Synchytrium_decipiens
OTU_169	8.69262865090403e-05	2.17315716272601e-05	0	0	2.17315716272601e-05	0	6.51947148817803e-05	0.000782336578581363	2.17315716272601e-05	4.34631432545202e-05	0.000608484005563282	0.000282510431154381	0.000695410292072323	0.000173852573018081	0.000325973574408901	0.000434631432545202	0.000478094575799722	0.000325973574408901	0.000890994436717663	0.000282510431154381	4.34631432545202e-05	0.000869262865090403	6.51947148817803e-05	0.000173852573018081	4.34631432545202e-05	0	0	2.17315716272601e-05	0.000195584144645341	0	2.17315716272601e-05	0	0	4.34631432545202e-05	2.17315716272601e-05	0.000717141863699583	k__Fungi;p__Ascomycota
OTU_170	0.000173852573018081	0.000325973574408901	8.69262865090403e-05	0.000478094575799722	0.0001086578581363	0.000586752433936022	0.000586752433936022	0.00158640472878999	4.34631432545202e-05	0.001086578581363	0.000152121001390821	0.00143428372739917	0.000304242002781641	0.00115177329624478	0.0001086578581363	0.000304242002781641	0.000173852573018081	0.000304242002781641	4.34631432545202e-05	0.0001086578581363	2.17315716272601e-05	0	4.34631432545202e-05	4.34631432545202e-05	0.000152121001390821	4.34631432545202e-05	0.0001086578581363	8.69262865090403e-05	6.51947148817803e-05	0.000239047287899861	4.34631432545202e-05	0.000152121001390821	0.0001086578581363	8.69262865090403e-05	0.00341185674547983	0.0001086578581363	k__Fungi;p__Ascomycota;c__Taphrinomycetes;o__Taphrinales;f__Taphrinaceae;g__Taphrina;s__Taphrina_virginica
OTU_171	0	0	0	8.69262865090403e-05	6.51947148817803e-05	0	0	0	0	4.34631432545202e-05	0.00619349791376912	8.69262865090403e-05	6.51947148817803e-05	0.0001086578581363	0.000130389429763561	0.000608484005563282	0.000391168289290681	4.34631432545202e-05	0	2.17315716272601e-05	6.51947148817803e-05	0.000239047287899861	0	0	0	0	0.000130389429763561	0.0001086578581363	8.69262865090403e-05	8.69262865090403e-05	4.34631432545202e-05	0.000152121001390821	0.000152121001390821	0	0	6.51947148817803e-05	k__Chloroplastida;p__Chlorophyta;c__Chlorophyceae;o__unidentified;f__unidentified;g__Radiococcus
OTU_172	0	0	0	0.000999652294853964	0	0	6.51947148817803e-05	2.17315716272601e-05	0	8.69262865090403e-05	6.51947148817803e-05	0.000369436717663421	0.000456363004172462	0.000260778859527121	0.000325973574408901	0.00339012517385257	0.000391168289290681	0.000347705146036161	0.000282510431154381	0.000499826147426982	2.17315716272601e-05	4.34631432545202e-05	2.17315716272601e-05	0	0	0	0.000869262865090403	0	8.69262865090403e-05	0	2.17315716272601e-05	0.000825799721835883	2.17315716272601e-05	2.17315716272601e-05	0	0.0001086578581363	k__Holozoa;p__unidentified;c__Ichthyophonae;o__Pseudoperkinsidae;f__unidentified;g__Anurofeca;s__uncultured_eukaryote
OTU_173	0.000173852573018081	0.0001086578581363	6.51947148817803e-05	8.69262865090403e-05	0.000152121001390821	0.0001086578581363	0.00115177329624478	0.000565020862308762	4.34631432545202e-05	0.000412899860917942	0.000152121001390821	0.00284683588317107	0.000391168289290681	0.000630215577190542	0.000195584144645341	0.000391168289290681	0.000434631432545202	0.000130389429763561	0.000152121001390821	0.000239047287899861	0.000173852573018081	0.000412899860917942	0.000543289290681502	0.00184718358831711	0.000825799721835883	0.000260778859527121	0.000173852573018081	0.000304242002781641	0.000217315716272601	0.000130389429763561	6.51947148817803e-05	2.17315716272601e-05	8.69262865090403e-05	4.34631432545202e-05	0.0001086578581363	0.0001086578581363	k__Fungi;p__Basidiomycota;c__Exobasidiomycetidae;o__Exobasidiales;f__Brachybasidiaceae;g__Dicellomyces;s__Dicellomyces_scirpi
OTU_174	0.000152121001390821	0.000152121001390821	0.0001086578581363	0.000130389429763561	0.000195584144645341	0.000130389429763561	4.34631432545202e-05	8.69262865090403e-05	2.17315716272601e-05	0.000760605006954103	8.69262865090403e-05	0.000347705146036161	0.000391168289290681	0.000521557719054242	0.000217315716272601	0.000347705146036161	0.000456363004172462	0.000217315716272601	8.69262865090403e-05	0.000152121001390821	0.0001086578581363	6.51947148817803e-05	8.69262865090403e-05	0.00102138386648122	0.000239047287899861	0.000152121001390821	0.0001086578581363	0.00145601529902643	0.00102138386648122	0.000217315716272601	0	0.000239047287899861	0.000217315716272601	0.000239047287899861	0.000195584144645341	0.000369436717663421	k__Fungi;p__Basidiomycota;c__Tremellomycetidae;o__Tremellales;f__unidentified
OTU_175	4.34631432545202e-05	0.00334666203059805	0.000152121001390821	6.51947148817803e-05	6.51947148817803e-05	2.17315716272601e-05	0.000869262865090403	2.17315716272601e-05	2.17315716272601e-05	0.000217315716272601	0.000347705146036161	0.000239047287899861	0.000499826147426982	0.000391168289290681	0.000217315716272601	0.000282510431154381	0.0001086578581363	0.0001086578581363	0.000217315716272601	0.000152121001390821	0.000347705146036161	0.000804068150208623	0.0001086578581363	0	0.000217315716272601	4.34631432545202e-05	2.17315716272601e-05	0	0	0.000282510431154381	2.17315716272601e-05	0	0	0	0	0	k__Alveolata;p__Ciliophora;c__Oligohymenophorea;o__Conthreep;f__unidentified;g__Pseudocohnilembus;s__Pseudocohnilembus_persalinus
OTU_176	0.000195584144645341	0.000304242002781641	2.17315716272601e-05	8.69262865090403e-05	0.000152121001390821	0.0001086578581363	4.34631432545202e-05	0	2.17315716272601e-05	0.0001086578581363	0.000130389429763561	0.000847531293463143	0.000260778859527121	0.0001086578581363	8.69262865090403e-05	2.17315716272601e-05	0	0	4.34631432545202e-05	0.000130389429763561	0	0	0.000239047287899861	0.000152121001390821	2.17315716272601e-05	0	4.34631432545202e-05	0.00315107788595271	0.00130389429763561	4.34631432545202e-05	2.17315716272601e-05	0.000304242002781641	0.000152121001390821	0.000260778859527121	0.000325973574408901	8.69262865090403e-05	k__Fungi;p__Ascomycota;c__Dothideomycetes;o__Myriangiales;f__Myriangiaceae;g__Myriangium;s__Myriangium_duriaei
OTU_177	0.00132562586926287	0.000152121001390821	0.000456363004172462	0.000912726008344923	0.000369436717663421	0.000738873435326843	0.00256432545201669	0.00228181502086231	0.000152121001390821	2.17315716272601e-05	2.17315716272601e-05	2.17315716272601e-05	0.000304242002781641	4.34631432545202e-05	4.34631432545202e-05	0.000195584144645341	6.51947148817803e-05	6.51947148817803e-05	4.34631432545202e-05	2.17315716272601e-05	0	0	0	6.51947148817803e-05	2.17315716272601e-05	0.000152121001390821	0.000130389429763561	4.34631432545202e-05	0.000195584144645341	0	6.51947148817803e-05	0.000217315716272601	2.17315716272601e-05	0	0.000586752433936022	2.17315716272601e-05	k__Fungi;p__Ascomycota
OTU_178	0.000847531293463143	0.000977920723226704	0.000804068150208623	0.00195584144645341	0.00139082058414465	0.00141255215577191	0.00147774687065369	0.000825799721835883	0.00315107788595271	0.000325973574408901	0.00158640472878999	0.000565020862308762	0.00104311543810848	0.00130389429763561	0.00415073018080668	0.000956189151599444	0.00123869958275382	0.000456363004172462	0.000195584144645341	0.000847531293463143	0.00286856745479833	0.00173852573018081	0.00145601529902643	0.00121696801112656	0.0130824061196106	0.00278164116828929	0.00158640472878999	0.000391168289290681	0.00154294158553547	0.000760605006954103	0.000521557719054242	0.000782336578581363	0.000890994436717663	0.000565020862308762	0.00399860917941586	0.00208623087621697	k__Fungi;p__Ascomycota;c__Dothideomycetes;o__Pleosporales
OTU_179	0.0001086578581363	0.000173852573018081	4.34631432545202e-05	0.000282510431154381	0.000130389429763561	0	6.51947148817803e-05	0	0.000130389429763561	2.17315716272601e-05	0.00388995132127956	6.51947148817803e-05	0.000304242002781641	0.000152121001390821	0.000282510431154381	0.000717141863699583	0.000391168289290681	8.69262865090403e-05	4.34631432545202e-05	0.0001086578581363	6.51947148817803e-05	0.000130389429763561	0	2.17315716272601e-05	4.34631432545202e-05	0	0.000239047287899861	4.34631432545202e-05	4.34631432545202e-05	4.34631432545202e-05	2.17315716272601e-05	0.000239047287899861	6.51947148817803e-05	4.34631432545202e-05	0	4.34631432545202e-05	k__Chloroplastida;p__Chlorophyta;c__Chlorophyceae;o__unidentified;f__unidentified
OTU_180	0.000304242002781641	0.0001086578581363	0.000195584144645341	0.000304242002781641	0.000239047287899861	0.000260778859527121	0.00265125173852573	0.0093663073713491	0.000586752433936022	4.34631432545202e-05	2.17315716272601e-05	0.0001086578581363	6.51947148817803e-05	0	2.17315716272601e-05	6.51947148817803e-05	4.34631432545202e-05	0	6.51947148817803e-05	2.17315716272601e-05	0	0	0	4.34631432545202e-05	0	8.69262865090403e-05	4.34631432545202e-05	0.000152121001390821	0.000239047287899861	0	6.51947148817803e-05	0.0001086578581363	2.17315716272601e-05	0	0	0.000565020862308762	k__Chloroplastida;p__Chlorophyta;c__Chlorophyceae;o__CCCryo;f__unidentified;g__unidentified;s__uncultured_Dunaliellaceae
OTU_181	0.000282510431154381	0.000347705146036161	8.69262865090403e-05	0.000478094575799722	0.000499826147426982	0.000217315716272601	0.000217315716272601	0.000130389429763561	8.69262865090403e-05	0.000825799721835883	0.000325973574408901	0.000825799721835883	0.00102138386648122	0.00123869958275382	0.000478094575799722	0.00197757301808067	0.00139082058414465	0.000825799721835883	0.000217315716272601	0.000499826147426982	0.000391168289290681	0.000152121001390821	0.000499826147426982	0.000738873435326843	0.000239047287899861	6.51947148817803e-05	0.000304242002781641	0.000434631432545202	0.000412899860917942	0.000456363004172462	0.000130389429763561	0.000934457579972184	0.000651947148817803	0.000239047287899861	0.000239047287899861	0.000130389429763561	k__Fungi;p__Basidiomycota;c__Tremellomycetidae;o__Filobasidiales;f__Filobasidiaceae;g__unidentified
OTU_182	8.69262865090403e-05	0.000217315716272601	2.17315716272601e-05	0	0	0.000217315716272601	0	0	4.34631432545202e-05	2.17315716272601e-05	4.34631432545202e-05	0	0.0001086578581363	0.000260778859527121	0	0.000130389429763561	4.34631432545202e-05	2.17315716272601e-05	0	0	0.000130389429763561	0.000565020862308762	0.000152121001390821	8.69262865090403e-05	0.0040855354659249	0.000239047287899861	0.000173852573018081	2.17315716272601e-05	0.000608484005563282	0.000217315716272601	4.34631432545202e-05	0.000195584144645341	6.51947148817803e-05	2.17315716272601e-05	2.17315716272601e-05	4.34631432545202e-05	k__Fungi;p__Ascomycota;c__Leotiomycetes
OTU_183	0.000130389429763561	0.000130389429763561	6.51947148817803e-05	0.000152121001390821	0.000391168289290681	0.000130389429763561	0.000217315716272601	0.000478094575799722	0.000565020862308762	0.000130389429763561	0.000478094575799722	0.000217315716272601	0.0001086578581363	6.51947148817803e-05	4.34631432545202e-05	6.51947148817803e-05	0.0001086578581363	6.51947148817803e-05	0.000282510431154381	0.000304242002781641	0.000369436717663421	0.00128216272600834	0.000651947148817803	0.000499826147426982	0.000325973574408901	0.000173852573018081	0.000347705146036161	0.000478094575799722	0.000130389429763561	2.17315716272601e-05	4.34631432545202e-05	0.000130389429763561	0.000347705146036161	0.000152121001390821	0.000173852573018081	0.000543289290681502	k__Fungi;p__unidentified;c__unidentified;o__Mucorales;f__unidentified;g__Mucor;s__unidentified
OTU_184	0.000608484005563282	0.000152121001390821	0.000478094575799722	6.51947148817803e-05	8.69262865090403e-05	0.0001086578581363	0.00186891515994437	0.000608484005563282	0.000499826147426982	0.000217315716272601	0.000434631432545202	0.000325973574408901	0.000651947148817803	0.000239047287899861	0.000434631432545202	0.0001086578581363	0.000173852573018081	2.17315716272601e-05	0.000651947148817803	0.000325973574408901	0.00154294158553547	0.00345531988873435	0.00217315716272601	0.00202103616133519	0.00117350486787204	0.00215142559109875	0.000347705146036161	0.000152121001390821	0.000260778859527121	0.0001086578581363	0.000195584144645341	4.34631432545202e-05	8.69262865090403e-05	4.34631432545202e-05	0.000456363004172462	0.000369436717663421	k__Animalia;p__Rotifera;c__unidentified;o__unidentified;f__Philodinidae;g__unidentified;s__uncultured_bdelloid_rotifer
OTU_185	2.17315716272601e-05	0	0.000869262865090403	0	0	0	0	0	0	0	0	2.17315716272601e-05	0.000152121001390821	0	0.000869262865090403	0	0	2.17315716272601e-05	2.17315716272601e-05	6.51947148817803e-05	0.000391168289290681	0.000434631432545202	0.000260778859527121	0.000434631432545202	0.000434631432545202	0.00226008344923505	0.000586752433936022	0	6.51947148817803e-05	2.17315716272601e-05	0.000760605006954103	0	0	0	0	0	k__Fungi;p__Ascomycota;c__Saccharomycetes;o__Saccharomycetales;f__unidentified;g__Cyberlindnera
OTU_186	0.000239047287899861	0.000456363004172462	0.000456363004172462	0.000152121001390821	0.000434631432545202	0.000782336578581363	0.000217315716272601	0.0001086578581363	0.000391168289290681	0.000195584144645341	0.000217315716272601	0.00751912378303199	0.000586752433936022	0.00132562586926287	0.00167333101529903	0.000391168289290681	0.000608484005563282	0.000217315716272601	0.000239047287899861	0.000325973574408901	4.34631432545202e-05	8.69262865090403e-05	0.000412899860917942	0.00158640472878999	0.000543289290681502	0.000347705146036161	8.69262865090403e-05	0.000347705146036161	0.000760605006954103	0.000195584144645341	0.000282510431154381	0.000434631432545202	0.000195584144645341	0.000282510431154381	0.000760605006954103	0.00488960361613352	k__Fungi;p__Ascomycota;c__Dothideomycetes
OTU_187	0.000543289290681502	0.0001086578581363	0	8.69262865090403e-05	0.000195584144645341	0	0	0.000565020862308762	0	0.0001086578581363	0.000217315716272601	0	0.000434631432545202	2.17315716272601e-05	0	0	0.000152121001390821	0	0.000391168289290681	4.34631432545202e-05	2.17315716272601e-05	8.69262865090403e-05	0	0.000304242002781641	0.000152121001390821	6.51947148817803e-05	0.000130389429763561	0.000260778859527121	0.000912726008344923	0.000239047287899861	0.000217315716272601	0.000521557719054242	0.000260778859527121	0.000260778859527121	0.000130389429763561	0.00113004172461752	k__Fungi;p__Basidiomycota;c__unidentified;o__Pucciniales;f__Melampsoraceae;g__Melampsora;s__Melampsora_epitea
OTU_188	4.34631432545202e-05	0.000195584144645341	0.000130389429763561	0.000173852573018081	6.51947148817803e-05	0.0001086578581363	4.34631432545202e-05	2.17315716272601e-05	0.00832319193324061	0	0	0	0	0	0	0	0	0	0	0.000130389429763561	4.34631432545202e-05	4.34631432545202e-05	0	0	0	0	0	0	0	0	0	0	0	0	0	0	k__Chloroplastida;p__Streptophyta;c__Embryophyta;o__Metzgeriales;f__unidentified;g__Pallavicinia;s__Pallavicinia_lyellii
OTU_189	0.000260778859527121	0.000304242002781641	0.000152121001390821	6.51947148817803e-05	0.000565020862308762	0.000391168289290681	0.000521557719054242	2.17315716272601e-05	0.000152121001390821	6.51947148817803e-05	0.000152121001390821	0.00267298331015299	0.000195584144645341	0.000217315716272601	0.0001086578581363	6.51947148817803e-05	0.000282510431154381	0.000152121001390821	0	8.69262865090403e-05	8.69262865090403e-05	0.000260778859527121	0.000152121001390821	6.51947148817803e-05	0.000260778859527121	0.000152121001390821	0.000152121001390821	2.17315716272601e-05	6.51947148817803e-05	0.0001086578581363	4.34631432545202e-05	6.51947148817803e-05	4.34631432545202e-05	0.000152121001390821	8.69262865090403e-05	0	k__Fungi;p__Ascomycota;c__Dothideomycetes;o__Capnodiales;f__Teratosphaeriaceae;g__unidentified
OTU_190	0	0	0	0	0	0	2.17315716272601e-05	0	0	0	0.000391168289290681	4.34631432545202e-05	8.69262865090403e-05	0	0	0	2.17315716272601e-05	0	0	0	0	6.51947148817803e-05	0	0	0.000152121001390821	4.34631432545202e-05	2.17315716272601e-05	0	0	0	0	0	0	0	6.51947148817803e-05	0	k__Animalia;p__Arthropoda;c__Maxillopoda;o__unidentified;f__unidentified;g__unidentified
OTU_191	0	0.000152121001390821	0	2.17315716272601e-05	0	0.0001086578581363	0.000217315716272601	0	0	2.17315716272601e-05	0	0	2.17315716272601e-05	6.51947148817803e-05	4.34631432545202e-05	0	6.51947148817803e-05	4.34631432545202e-05	0	8.69262865090403e-05	0.000130389429763561	0.000239047287899861	0.000152121001390821	2.17315716272601e-05	0.00223835187760779	0.000239047287899861	0.000130389429763561	4.34631432545202e-05	2.17315716272601e-05	4.34631432545202e-05	2.17315716272601e-05	0.000130389429763561	0	4.34631432545202e-05	0.000173852573018081	0.000239047287899861	k__Fungi;p__Ascomycota
OTU_192	0.00113004172461752	0.000608484005563282	0.000869262865090403	0.00102138386648122	0.000782336578581363	0.000847531293463143	0.000738873435326843	0.000456363004172462	0.000630215577190542	0	0	0.000760605006954103	0	0	0	0	0	0	0	0	0	0	0.000912726008344923	0	0	0	0	0.00104311543810848	0	0	0	2.17315716272601e-05	0	0	0	0	k__Fungi;p__Chytridiomycota;c__Chytridiomycetes
OTU_193	0.000782336578581363	0.000586752433936022	0.000608484005563282	0.000825799721835883	0.000695410292072323	0.000847531293463143	0.000456363004172462	0.000347705146036161	0.000434631432545202	0	0.00147774687065369	0	0	0	0	0	0	0	0	0	0	0.00191237830319889	0	0	0	0	0	2.17315716272601e-05	0	0	0	0	0	0	0	0	k__Fungi;p__unidentified;c__unidentified;o__unidentified;f__unidentified;g__uncultured;s__uncultured_fungus
OTU_194	0.000304242002781641	0.000412899860917942	6.51947148817803e-05	0	2.17315716272601e-05	0	0	0	0	2.17315716272601e-05	2.17315716272601e-05	0.000195584144645341	0.000391168289290681	0.001086578581363	0.000152121001390821	8.69262865090403e-05	8.69262865090403e-05	0.000130389429763561	6.51947148817803e-05	0	0.000347705146036161	0.000304242002781641	0.00154294158553547	0.000934457579972184	0.00304242002781641	0.000239047287899861	0.000130389429763561	0.000152121001390821	0.000173852573018081	0.000173852573018081	8.69262865090403e-05	0	2.17315716272601e-05	2.17315716272601e-05	2.17315716272601e-05	0	k__Fungi;p__Basidiomycota;c__Exobasidiomycetidae;o__Tilletiales;f__unidentified;g__Tilletia;s__Tilletia_iowensis
OTU_195	0	0	0	0	0	6.51947148817803e-05	0.000478094575799722	0	4.34631432545202e-05	0	0	0.000130389429763561	2.17315716272601e-05	4.34631432545202e-05	0	6.51947148817803e-05	2.17315716272601e-05	8.69262865090403e-05	0	0.0001086578581363	0.000239047287899861	0.000152121001390821	0.000260778859527121	0.000173852573018081	0.000195584144645341	0.000478094575799722	0.000282510431154381	6.51947148817803e-05	2.17315716272601e-05	4.34631432545202e-05	0	0	4.34631432545202e-05	4.34631432545202e-05	0.000325973574408901	0	k__Fungi;p__Ascomycota;c__Eurotiomycetes;o__Verrucariales;f__Verrucariaceae;g__Hydropunctaria;s__Hydropunctaria_rheitrophila
OTU_196	6.51947148817803e-05	0.000152121001390821	0.0001086578581363	4.34631432545202e-05	6.51947148817803e-05	8.69262865090403e-05	0.000130389429763561	0	6.51947148817803e-05	0.0001086578581363	6.51947148817803e-05	0.000325973574408901	0.000173852573018081	0.0001086578581363	6.51947148817803e-05	0.000152121001390821	6.51947148817803e-05	6.51947148817803e-05	2.17315716272601e-05	6.51947148817803e-05	0	0	0.0001086578581363	0.0001086578581363	2.17315716272601e-05	4.34631432545202e-05	6.51947148817803e-05	0.00186891515994437	0.000565020862308762	6.51947148817803e-05	4.34631432545202e-05	0.000217315716272601	0.000130389429763561	0.000195584144645341	0.00134735744089013	0.000152121001390821	k__Fungi;p__Ascomycota
OTU_197	0.000412899860917942	0.000325973574408901	0.000239047287899861	0.000282510431154381	0.000369436717663421	0.000391168289290681	0.000173852573018081	0.000804068150208623	0.000847531293463143	0.00360744089012517	0.000239047287899861	0.00241220445062587	0.00113004172461752	0.000565020862308762	0.000347705146036161	0.000565020862308762	0.000977920723226704	0.000391168289290681	0.000608484005563282	0.000478094575799722	0.000630215577190542	0.000804068150208623	0.000673678720445063	0.000434631432545202	0.000630215577190542	0.000651947148817803	0.00113004172461752	0.000434631432545202	0.000565020862308762	8.69262865090403e-05	0.000304242002781641	0.000217315716272601	0.000304242002781641	0.000304242002781641	0.00123869958275382	0.000217315716272601	k__Fungi;p__Ascomycota;c__Pezizomycetes;o__Pezizales;f__unidentified;g__Lecophagus;s__uncultured_fungal_contaminant
OTU_198	0.000521557719054242	6.51947148817803e-05	0.000195584144645341	0.0001086578581363	8.69262865090403e-05	0.000195584144645341	0.000130389429763561	4.34631432545202e-05	0.0001086578581363	2.17315716272601e-05	0.000239047287899861	0.000282510431154381	0.000391168289290681	8.69262865090403e-05	4.34631432545202e-05	6.51947148817803e-05	0.0001086578581363	8.69262865090403e-05	0	0.000304242002781641	0.000456363004172462	0.000630215577190542	0.000347705146036161	8.69262865090403e-05	0.00145601529902643	0.0001086578581363	0.000130389429763561	0.000195584144645341	0.0001086578581363	0	4.34631432545202e-05	2.17315716272601e-05	0	0	6.51947148817803e-05	2.17315716272601e-05	k__Stramenopiles;p__Diatomea;c__Bacillariophyceae;o__unidentified;f__unidentified;g__Nitzschia;s__unidentified
OTU_199	8.69262865090403e-05	0.000260778859527121	0.000391168289290681	0.000217315716272601	6.51947148817803e-05	0.000130389429763561	0.000673678720445063	0	4.34631432545202e-05	4.34631432545202e-05	4.34631432545202e-05	0.000347705146036161	0.000260778859527121	0.000195584144645341	0.000347705146036161	0.000195584144645341	0.000173852573018081	6.51947148817803e-05	0	0	0.000195584144645341	0.000173852573018081	0.000630215577190542	0.000173852573018081	0.00206449930458971	0.000586752433936022	0.00139082058414465	0.00123869958275382	0.000217315716272601	0.000173852573018081	0.000478094575799722	0.000239047287899861	0.000130389429763561	0.000173852573018081	4.34631432545202e-05	6.51947148817803e-05	k__Chloroplastida;p__Chlorophyta;c__Trebouxiophyceae;o__unidentified;f__unidentified;g__Xylochloris;s__uncultured_Xylochloris
OTU_200	0	0	0.0001086578581363	0	0.000217315716272601	0	0	0	0	0.00162986787204451	2.17315716272601e-05	0	2.17315716272601e-05	2.17315716272601e-05	0.000173852573018081	6.51947148817803e-05	0.000325973574408901	0	6.51947148817803e-05	0.000152121001390821	0.000239047287899861	0.000239047287899861	0.000956189151599444	0.000217315716272601	0.000282510431154381	0.000782336578581363	0.000195584144645341	2.17315716272601e-05	0	0	0.000130389429763561	4.34631432545202e-05	0.000217315716272601	4.34631432545202e-05	0	4.34631432545202e-05	k__Fungi;p__Ascomycota;c__Saccharomycetes;o__Saccharomycetales;f__unidentified;g__Candida;s__Candida_glabrata
OTU_201	0	0.000847531293463143	6.51947148817803e-05	0.000325973574408901	2.17315716272601e-05	6.51947148817803e-05	0	6.51947148817803e-05	0	0	2.17315716272601e-05	0.000152121001390821	0	0.000804068150208623	4.34631432545202e-05	0.000347705146036161	0	2.17315716272601e-05	6.51947148817803e-05	0	0.000630215577190542	0.000543289290681502	0.000521557719054242	0.000434631432545202	0.00262952016689847	0.000804068150208623	0.00115177329624478	0.000130389429763561	8.69262865090403e-05	0.000782336578581363	0	0.000369436717663421	4.34631432545202e-05	2.17315716272601e-05	0	0.000173852573018081	k__Fungi;p__Basidiomycota;c__unidentified;o__Pucciniales;f__Coleosporiaceae;g__Chrysomyxa;s__Chrysomyxa_arctostaphyli
OTU_202	0	2.17315716272601e-05	0	2.17315716272601e-05	2.17315716272601e-05	6.51947148817803e-05	0	0	2.17315716272601e-05	0	2.17315716272601e-05	0	0	0	4.34631432545202e-05	0.000325973574408901	4.34631432545202e-05	6.51947148817803e-05	0	6.51947148817803e-05	0.000521557719054242	0.0001086578581363	0.000195584144645341	0	0.000543289290681502	2.17315716272601e-05	0.00519384561891516	0	0	4.34631432545202e-05	0	0	0	2.17315716272601e-05	0	0	k__Animalia;p__Annelida;c__unidentified;o__unidentified;f__unidentified;g__unidentified;s__Aeolosoma_viride
OTU_203	0.000586752433936022	0.00547635605006954	0.000325973574408901	0.000239047287899861	0.000152121001390821	0.000499826147426982	0.0001086578581363	0.000782336578581363	8.69262865090403e-05	0.000130389429763561	0.000239047287899861	0.000217315716272601	0.000239047287899861	0.000260778859527121	8.69262865090403e-05	0.000217315716272601	0.000173852573018081	6.51947148817803e-05	4.34631432545202e-05	0.0001086578581363	0.000195584144645341	0.000282510431154381	8.69262865090403e-05	4.34631432545202e-05	0.000195584144645341	6.51947148817803e-05	6.51947148817803e-05	0.00121696801112656	0.000347705146036161	0.000173852573018081	2.17315716272601e-05	6.51947148817803e-05	0.00121696801112656	0.0001086578581363	0	0.000977920723226704	k__Eukaryota;p__LKM11;c__unidentified;o__unidentified;f__unidentified;g__unidentified
OTU_204	0.000890994436717663	0.00121696801112656	0.000804068150208623	0.0011952364394993	0.00117350486787204	0.000847531293463143	0.000260778859527121	0.000804068150208623	0.000304242002781641	0.00260778859527121	0.000738873435326843	0.000934457579972184	0.000804068150208623	0.000717141863699583	0.000391168289290681	0.000673678720445063	0.00262952016689847	0.000239047287899861	0.000217315716272601	0.000195584144645341	0.000369436717663421	2.17315716272601e-05	0.000695410292072323	0.000130389429763561	0.000651947148817803	8.69262865090403e-05	0.000347705146036161	0.00160813630041725	0.000347705146036161	4.34631432545202e-05	0.0001086578581363	0.000239047287899861	0.000304242002781641	0.000130389429763561	2.17315716272601e-05	0.00178198887343533	k__Chloroplastida;p__Phragmoplastophyta;c__unidentified;o__Zygnematales;f__unidentified
OTU_205	0.000391168289290681	0.000630215577190542	4.34631432545202e-05	0.000260778859527121	8.69262865090403e-05	8.69262865090403e-05	0	0	0	0	0	0	0	0	0	0	0	0	0	0	0	0	0	0	0	0	0	0	6.51947148817803e-05	0	6.51947148817803e-05	4.34631432545202e-05	0.00523730876216968	8.69262865090403e-05	0	0	k__Eukaryota;p__RT5iin25;c__unidentified;o__unidentified;f__unidentified;g__unidentified
OTU_206	0.000217315716272601	0	0	0	0	0	0	0	4.34631432545202e-05	0	0	0	0.000260778859527121	0	0	0	0	0	0	4.34631432545202e-05	4.34631432545202e-05	0	0.000217315716272601	0.0001086578581363	2.17315716272601e-05	6.51947148817803e-05	4.34631432545202e-05	0	6.51947148817803e-05	0	0	0	0	0	0	0	k__Fungi;p__Ascomycota;c__Saccharomycetes;o__Saccharomycetales;f__Saccharomycetaceae;g__Kodamaea;s__Kodamaea_ohmeri
OTU_207	6.51947148817803e-05	0.000130389429763561	0.000195584144645341	0.000347705146036161	0.000239047287899861	0.000304242002781641	0.00321627260083449	0.00575886648122392	6.51947148817803e-05	8.69262865090403e-05	0.000195584144645341	0.000260778859527121	0.000152121001390821	4.34631432545202e-05	0.000130389429763561	0.000130389429763561	0.000695410292072323	4.34631432545202e-05	0.0001086578581363	2.17315716272601e-05	0.000412899860917942	0.000565020862308762	0.000434631432545202	0.000130389429763561	0.0001086578581363	0.000391168289290681	0.000130389429763561	4.34631432545202e-05	0.000347705146036161	6.51947148817803e-05	6.51947148817803e-05	6.51947148817803e-05	0.0001086578581363	0.000152121001390821	0.000325973574408901	0.000195584144645341	k__Fungi;p__Basidiomycota;c__unidentified;o__Leucosporidiales;f__Leucosporidiaceae;g__Sporobolomyces;s__Sporobolomyces_griseoflavus
OTU_208	0.000369436717663421	0.000369436717663421	0.000304242002781641	0.000260778859527121	0.000434631432545202	0.000347705146036161	0.000760605006954103	0.00121696801112656	0.000173852573018081	0.000478094575799722	0.000412899860917942	0.000217315716272601	0.000391168289290681	0.000717141863699583	0.00106484700973574	0.000412899860917942	0.000499826147426982	4.34631432545202e-05	8.69262865090403e-05	0.000152121001390821	0.00145601529902643	0.00123869958275382	0.000825799721835883	0.000521557719054242	0.00449843532684284	0.00269471488178025	0.000651947148817803	0.000391168289290681	0.000195584144645341	0.000239047287899861	0.000217315716272601	0.000282510431154381	0.000347705146036161	0.000173852573018081	0.000412899860917942	0.000130389429763561	k__Fungi;p__Ascomycota;c__Sordariomycetes;o__Hypocreales
OTU_209	0	4.34631432545202e-05	0.000347705146036161	6.51947148817803e-05	0	0	0.000260778859527121	6.51947148817803e-05	2.17315716272601e-05	0.0001086578581363	0.000347705146036161	0.000325973574408901	0.000608484005563282	0.000456363004172462	0.000934457579972184	0.000543289290681502	0.000239047287899861	8.69262865090403e-05	8.69262865090403e-05	0.000130389429763561	0.00106484700973574	0.00249913073713491	0.000717141863699583	0.000977920723226704	0.000608484005563282	0.00180372044506259	0.000152121001390821	4.34631432545202e-05	0	0	8.69262865090403e-05	4.34631432545202e-05	0	0	6.51947148817803e-05	0	k__Stramenopiles;p__unidentified;c__Chrysophyceae;o__Ochromonadales;f__unidentified;g__Epipyxis;s__uncultured_chrysophyte
OTU_210	0.000456363004172462	0.000304242002781641	0.000260778859527121	0.000282510431154381	0.000695410292072323	0.000195584144645341	0.000130389429763561	0.0001086578581363	0.00325973574408901	6.51947148817803e-05	0.000282510431154381	0.000869262865090403	0.000608484005563282	0.000304242002781641	0.000434631432545202	0.000565020862308762	0.000434631432545202	0.000391168289290681	0.000130389429763561	0.000282510431154381	0.000391168289290681	0.000347705146036161	0.000738873435326843	0.000325973574408901	0.000825799721835883	0.000608484005563282	0.000304242002781641	0.000217315716272601	0.000434631432545202	4.34631432545202e-05	0.000282510431154381	0.000152121001390821	0.000282510431154381	8.69262865090403e-05	0.000586752433936022	2.17315716272601e-05	k__Chloroplastida;p__Chlorophyta;c__Trebouxiophyceae;o__unidentified;f__unidentified;g__Trebouxia;s__Trebouxia_usneae
OTU_211	0.000152121001390821	0.000347705146036161	0	6.51947148817803e-05	2.17315716272601e-05	4.34631432545202e-05	4.34631432545202e-05	0	4.34631432545202e-05	4.34631432545202e-05	0.000434631432545202	0	0.0001086578581363	0.0001086578581363	2.17315716272601e-05	0.000173852573018081	0.000130389429763561	2.17315716272601e-05	2.17315716272601e-05	4.34631432545202e-05	0	6.51947148817803e-05	6.51947148817803e-05	0.000173852573018081	0.00141255215577191	8.69262865090403e-05	0.000152121001390821	0	8.69262865090403e-05	0.000304242002781641	4.34631432545202e-05	6.51947148817803e-05	6.51947148817803e-05	8.69262865090403e-05	0	0	k__Fungi;p__Basidiomycota;c__Agaricomycetes;o__Trechisporales;f__Hydnodontaceae;g__uncultured;s__uncultured_fungus
OTU_212	0	0.000304242002781641	0.000608484005563282	0	4.34631432545202e-05	0	2.17315716272601e-05	0	2.17315716272601e-05	0	0	0	0	0.000130389429763561	0.000651947148817803	0	0	0	0	6.51947148817803e-05	0.000217315716272601	0.000499826147426982	0.000239047287899861	0.000217315716272601	0.00232527816411683	0.00380302503477051	0.000260778859527121	0	0	6.51947148817803e-05	0.000478094575799722	0	0	0	0	0	k__Fungi;p__Ascomycota;c__Eurotiomycetes;o__Coryneliales;f__Coryneliaceae;g__Caliciopsis;s__Caliciopsis_pinea
OTU_213	0	0.0001086578581363	0.000195584144645341	0	0	0	0	0	0	2.17315716272601e-05	0	8.69262865090403e-05	2.17315716272601e-05	0.000412899860917942	0.000173852573018081	8.69262865090403e-05	2.17315716272601e-05	2.17315716272601e-05	0	0	0.000217315716272601	0.000173852573018081	0.000717141863699583	0.00195584144645341	0.000999652294853964	0.000912726008344923	0.000347705146036161	2.17315716272601e-05	0	8.69262865090403e-05	0.000130389429763561	0	0	4.34631432545202e-05	0	2.17315716272601e-05	k__Fungi;p__Basidiomycota;c__Exobasidiomycetidae;o__Doassansiales;f__Doassansiaceae;g__Doassansia;s__Doassansia_hygrophilae
OTU_214	2.17315716272601e-05	6.51947148817803e-05	0	0	2.17315716272601e-05	6.51947148817803e-05	0.000282510431154381	2.17315716272601e-05	0.000543289290681502	0	0	0.000521557719054242	0.000239047287899861	0.000260778859527121	0.000195584144645341	8.69262865090403e-05	0.000130389429763561	0	0.000325973574408901	0.000977920723226704	0.000152121001390821	0.000304242002781641	0.000412899860917942	4.34631432545202e-05	0.000239047287899861	0.0001086578581363	2.17315716272601e-05	4.34631432545202e-05	0	0	0	0	0	0	2.17315716272601e-05	0	k__Animalia;p__Rotifera;c__unidentified;o__unidentified;f__Philodinidae;g__unidentified
OTU_215	0.000304242002781641	6.51947148817803e-05	6.51947148817803e-05	0.000478094575799722	0.000130389429763561	0.000543289290681502	0.000673678720445063	0.00212969401947149	8.69262865090403e-05	6.51947148817803e-05	6.51947148817803e-05	2.17315716272601e-05	0.000304242002781641	0.000304242002781641	4.34631432545202e-05	0.000152121001390821	6.51947148817803e-05	4.34631432545202e-05	6.51947148817803e-05	2.17315716272601e-05	4.34631432545202e-05	0.000195584144645341	0.000152121001390821	0.000217315716272601	0.000478094575799722	0.000130389429763561	0.000456363004172462	0	0.000717141863699583	4.34631432545202e-05	6.51947148817803e-05	0.0001086578581363	4.34631432545202e-05	6.51947148817803e-05	6.51947148817803e-05	6.51947148817803e-05	k__Fungi;p__Ascomycota;c__Leotiomycetes
OTU_216	0.00123869958275382	0.00134735744089013	0.00173852573018081	0.00139082058414465	0.00230354659248957	0.000956189151599444	0.00256432545201669	0.000999652294853964	0.00152121001390821	0.00167333101529903	0.0044115090403338	0.00345531988873435	0.00202103616133519	0.00193410987482615	0.00158640472878999	0.00219488873435327	0.00515038247566064	0.00106484700973574	0.000608484005563282	0.000673678720445063	0.000956189151599444	0.0011952364394993	0.00247739916550765	0.00391168289290681	0.00236874130737135	0.00208623087621697	0.00623696105702364	0.00171679415855355	0.00126043115438108	0.000738873435326843	0.00128216272600834	0.000760605006954103	0.00130389429763561	0.000478094575799722	0.000869262865090403	0.000282510431154381	k__Fungi;p__Ascomycota;c__Eurotiomycetes;o__Chaetothyriales;f__unidentified
OTU_217	0	0.000217315716272601	0	4.34631432545202e-05	0.000130389429763561	4.34631432545202e-05	4.34631432545202e-05	0	0	0	0	0	2.17315716272601e-05	0.000239047287899861	0	0	6.51947148817803e-05	0	0	0	0.0001086578581363	8.69262865090403e-05	0.000195584144645341	6.51947148817803e-05	0.00260778859527121	6.51947148817803e-05	0.00243393602225313	0	0	0.000130389429763561	0	0	4.34631432545202e-05	0	2.17315716272601e-05	0	k__Fungi;p__Ascomycota;c__Sordariomycetes;o__Hypocreales;f__unidentified;g__Sarocladium;s__Sarocladium_kiliense
OTU_218	0.000847531293463143	0.000651947148817803	0.000565020862308762	0.000825799721835883	0.000651947148817803	0.000521557719054242	0.000391168289290681	0.000282510431154381	0.000391168289290681	0	0	0.000738873435326843	0	0	0	0	0	0	0	0	0	0	0.00139082058414465	0	0	0	0	0.00115177329624478	0	0	0	0	0	0	0	0	k__Fungi
OTU_219	6.51947148817803e-05	0	6.51947148817803e-05	0.000173852573018081	0.000325973574408901	6.51947148817803e-05	0.000130389429763561	0.000369436717663421	4.34631432545202e-05	4.34631432545202e-05	0.000130389429763561	0.000434631432545202	0.0001086578581363	0.000260778859527121	0.0001086578581363	0.000130389429763561	0.000347705146036161	6.51947148817803e-05	4.34631432545202e-05	4.34631432545202e-05	8.69262865090403e-05	0.000260778859527121	0.000217315716272601	2.17315716272601e-05	0.000304242002781641	0.000130389429763561	0	0	0.000130389429763561	2.17315716272601e-05	0.000130389429763561	4.34631432545202e-05	0.000130389429763561	0.000130389429763561	0.00128216272600834	0.000412899860917942	k__Fungi;p__Basidiomycota;c__unidentified;o__unidentified;f__unidentified;g__uncultured;s__uncultured_fungus
OTU_220	0.000195584144645341	0	0	4.34631432545202e-05	0	6.51947148817803e-05	0.0001086578581363	0.000195584144645341	0	0	8.69262865090403e-05	0.0001086578581363	0.000217315716272601	4.34631432545202e-05	0	0	2.17315716272601e-05	8.69262865090403e-05	0.000130389429763561	0	0.000456363004172462	0.00310761474269819	0.00162986787204451	0.00193410987482615	0.000456363004172462	0.000478094575799722	0.000478094575799722	2.17315716272601e-05	0.0001086578581363	0	0	0	6.51947148817803e-05	4.34631432545202e-05	0	6.51947148817803e-05	k__Alveolata;p__Apicomplexa;c__Gregarinasina;o__Eugregarinorida;f__unidentified;g__Elev-18S-388;s__uncultured_Eimeriidae
OTU_221	6.51947148817803e-05	0.000130389429763561	0.000152121001390821	8.69262865090403e-05	6.51947148817803e-05	0.000195584144645341	0.00189064673157163	2.17315716272601e-05	0	0.000804068150208623	6.51947148817803e-05	0.000152121001390821	6.51947148817803e-05	0	2.17315716272601e-05	4.34631432545202e-05	8.69262865090403e-05	8.69262865090403e-05	0	2.17315716272601e-05	8.69262865090403e-05	6.51947148817803e-05	0	0	0.000325973574408901	0.0001086578581363	8.69262865090403e-05	0	0.000130389429763561	4.34631432545202e-05	0.0001086578581363	0.000152121001390821	0.000304242002781641	6.51947148817803e-05	0.00113004172461752	2.17315716272601e-05	k__Fungi;p__Basidiomycota;c__Tremellomycetidae;o__Tremellales;f__unidentified;g__unidentified;s__uncultured_fungus
OTU_222	0.000521557719054242	0.0001086578581363	0.000391168289290681	0.000347705146036161	0.000282510431154381	0.000195584144645341	6.51947148817803e-05	0.000804068150208623	0.000130389429763561	2.17315716272601e-05	2.17315716272601e-05	0.000130389429763561	0.000130389429763561	8.69262865090403e-05	2.17315716272601e-05	4.34631432545202e-05	0	0	0	0	0	0	0.000325973574408901	6.51947148817803e-05	4.34631432545202e-05	4.34631432545202e-05	4.34631432545202e-05	0.00282510431154381	0.000521557719054242	2.17315716272601e-05	0.0001086578581363	0.000152121001390821	2.17315716272601e-05	4.34631432545202e-05	6.51947148817803e-05	4.34631432545202e-05	k__Chloroplastida;p__Chlorophyta;c__Chlorophyceae;o__unidentified;f__unidentified;g__Heterochlamydomonas
OTU_223	0.000239047287899861	0.000130389429763561	0.000325973574408901	0.000391168289290681	8.69262865090403e-05	0.000412899860917942	0.00102138386648122	0.00176025730180807	8.69262865090403e-05	2.17315716272601e-05	0.000152121001390821	4.34631432545202e-05	8.69262865090403e-05	0	4.34631432545202e-05	0.000195584144645341	0	6.51947148817803e-05	4.34631432545202e-05	0	0	4.34631432545202e-05	0.0001086578581363	0.0001086578581363	0	8.69262865090403e-05	0.0001086578581363	0.00126043115438108	0.000760605006954103	4.34631432545202e-05	0.0001086578581363	0.0001086578581363	2.17315716272601e-05	8.69262865090403e-05	0.000434631432545202	6.51947148817803e-05	k__Chloroplastida;p__Chlorophyta;c__Chlorophyceae;o__unidentified;f__unidentified;g__Chloromonas;s__Chloromonas_reticulata
OTU_224	0	0	0	0	0	0	0.000195584144645341	0	0	0	4.34631432545202e-05	0	0	0	0	0	0	0	0	0	2.17315716272601e-05	0.000565020862308762	0.000152121001390821	8.69262865090403e-05	0.000152121001390821	2.17315716272601e-05	6.51947148817803e-05	0	0	0	0	0	0	0	8.69262865090403e-05	0	k__Fungi;p__Chytridiomycota;c__Chytridiomycetes;o__Chytridiales;f__unidentified;g__Synchytrium
OTU_225	0.000239047287899861	0.000304242002781641	2.17315716272601e-05	0.000586752433936022	0.000152121001390821	0.000152121001390821	2.17315716272601e-05	2.17315716272601e-05	0.0001086578581363	0	6.51947148817803e-05	0.000130389429763561	0.000239047287899861	0.000173852573018081	4.34631432545202e-05	0	6.51947148817803e-05	6.51947148817803e-05	0	2.17315716272601e-05	0.000130389429763561	0.000173852573018081	0.00193410987482615	0.00221662030598053	0.00152121001390821	0.000304242002781641	0.000260778859527121	0	0.000195584144645341	0.0001086578581363	0.000152121001390821	8.69262865090403e-05	6.51947148817803e-05	2.17315716272601e-05	0.000347705146036161	0	k__Fungi;p__Ascomycota
OTU_226	0	6.51947148817803e-05	0.000173852573018081	6.51947148817803e-05	0.000239047287899861	4.34631432545202e-05	4.34631432545202e-05	0	0.00252086230876217	0	0	0.0001086578581363	4.34631432545202e-05	0	4.34631432545202e-05	0.000130389429763561	0	0	0	2.17315716272601e-05	0.0001086578581363	0.000499826147426982	0.000239047287899861	6.51947148817803e-05	0.000717141863699583	0.000347705146036161	4.34631432545202e-05	6.51947148817803e-05	0	0	4.34631432545202e-05	2.17315716272601e-05	2.17315716272601e-05	2.17315716272601e-05	0	0	k__Chloroplastida;p__Chlorophyta;c__Ulvophyceae;o__unidentified;f__unidentified;g__Printzina;s__Printzina_lagenifera
OTU_227	6.51947148817803e-05	4.34631432545202e-05	0.000195584144645341	6.51947148817803e-05	0.0001086578581363	0.0001086578581363	0.000260778859527121	2.17315716272601e-05	8.69262865090403e-05	0	2.17315716272601e-05	0.000347705146036161	6.51947148817803e-05	0.000130389429763561	0.00443324061196106	0.000239047287899861	0.000195584144645341	0.000130389429763561	0	0	0	2.17315716272601e-05	8.69262865090403e-05	2.17315716272601e-05	0	0.000239047287899861	2.17315716272601e-05	0	0	0	0.000152121001390821	0	0	0	4.34631432545202e-05	2.17315716272601e-05	k__Fungi;p__Basidiomycota;c__unidentified;o__Sporidiobolaceae;f__unidentified;g__Sporidiobolus;s__Sporidiobolus_ruineniae
OTU_228	0	8.69262865090403e-05	0	0	0	0	0	0	0	0	0	0	0	0	0	0	0	0	6.51947148817803e-05	0	0	0.0001086578581363	0.000195584144645341	0.000478094575799722	0	0	0	0	0	0	0	0	0	2.17315716272601e-05	0	0	k__Animalia;p__Arthropoda;c__Insecta;o__unidentified;f__unidentified;g__unidentified
OTU_229	0	0	4.34631432545202e-05	2.17315716272601e-05	8.69262865090403e-05	8.69262865090403e-05	0.00541116133518776	0.000325973574408901	4.34631432545202e-05	0.00154294158553547	0	0	0	0	0	2.17315716272601e-05	0	0	0	0	6.51947148817803e-05	0	0	0	0	6.51947148817803e-05	4.34631432545202e-05	4.34631432545202e-05	0	2.17315716272601e-05	4.34631432545202e-05	2.17315716272601e-05	4.34631432545202e-05	2.17315716272601e-05	0	0	k__Chloroplastida;p__Streptophyta;c__Embryophyta;o__Caryophyllales;f__unidentified;g__Stellaria;s__Stellaria_media
OTU_230	8.69262865090403e-05	0.000195584144645341	0.000282510431154381	6.51947148817803e-05	0.000130389429763561	8.69262865090403e-05	2.17315716272601e-05	0	4.34631432545202e-05	4.34631432545202e-05	2.17315716272601e-05	0.000325973574408901	0.000130389429763561	0.0001086578581363	0.000239047287899861	0.000152121001390821	6.51947148817803e-05	6.51947148817803e-05	0	0	0.000130389429763561	0.000217315716272601	0.000282510431154381	0.000152121001390821	0.000934457579972184	0.000543289290681502	0.000195584144645341	4.34631432545202e-05	0.0001086578581363	6.51947148817803e-05	0.000304242002781641	0.000130389429763561	4.34631432545202e-05	4.34631432545202e-05	0.000260778859527121	0.000325973574408901	k__Chloroplastida;p__Chlorophyta;c__Trebouxiophyceae;o__unidentified;f__unidentified
OTU_231	0	0.000217315716272601	6.51947148817803e-05	6.51947148817803e-05	0.000130389429763561	0.000499826147426982	0	0	0	0.000391168289290681	2.17315716272601e-05	4.34631432545202e-05	0	6.51947148817803e-05	0	0	2.17315716272601e-05	6.51947148817803e-05	2.17315716272601e-05	0	0.000260778859527121	0.0001086578581363	0.000456363004172462	4.34631432545202e-05	0.000152121001390821	0.000173852573018081	0.000130389429763561	2.17315716272601e-05	4.34631432545202e-05	2.17315716272601e-05	0.000173852573018081	0	2.17315716272601e-05	0.000152121001390821	0	0	k__Fungi;p__Basidiomycota;c__Agaricomycetes
OTU_232	4.34631432545202e-05	0.000130389429763561	0.000130389429763561	6.51947148817803e-05	0.000195584144645341	8.69262865090403e-05	8.69262865090403e-05	0.00121696801112656	6.51947148817803e-05	0	0.00184718358831711	0.00154294158553547	0.000304242002781641	0.000217315716272601	4.34631432545202e-05	0.0001086578581363	0.000347705146036161	8.69262865090403e-05	0.000239047287899861	6.51947148817803e-05	0.000369436717663421	0.000391168289290681	0.000347705146036161	6.51947148817803e-05	0.000391168289290681	6.51947148817803e-05	6.51947148817803e-05	2.17315716272601e-05	0.000391168289290681	2.17315716272601e-05	0.000325973574408901	4.34631432545202e-05	0.000651947148817803	2.17315716272601e-05	0.000912726008344923	0	k__Rhizaria;p__Cercozoa
OTU_233	0.000304242002781641	0.000217315716272601	0.000239047287899861	0.000173852573018081	0.000217315716272601	0.000760605006954103	0.000130389429763561	0.000521557719054242	6.51947148817803e-05	8.69262865090403e-05	0.000152121001390821	0.000391168289290681	0.000239047287899861	2.17315716272601e-05	4.34631432545202e-05	4.34631432545202e-05	0	8.69262865090403e-05	0	0	0	8.69262865090403e-05	0.000282510431154381	2.17315716272601e-05	6.51947148817803e-05	0	0	0.00249913073713491	0.000478094575799722	2.17315716272601e-05	0	2.17315716272601e-05	0	2.17315716272601e-05	0.000173852573018081	4.34631432545202e-05	k__Stramenopiles;p__CCI40;c__unidentified;o__unidentified;f__unidentified;g__unidentified;s__uncultured_marine_eukaryote
OTU_234	0.000173852573018081	0.000391168289290681	8.69262865090403e-05	0.0001086578581363	0.000130389429763561	0.0001086578581363	4.34631432545202e-05	6.51947148817803e-05	0.000673678720445063	0.000673678720445063	0.000260778859527121	0.000456363004172462	0.000586752433936022	0.00132562586926287	0.000282510431154381	0.000499826147426982	0.000325973574408901	0.000130389429763561	0.0001086578581363	0.000325973574408901	0.000195584144645341	0.000239047287899861	0.00113004172461752	0.000173852573018081	0.000804068150208623	0.000239047287899861	0.000152121001390821	0.000173852573018081	0.000304242002781641	0.000173852573018081	0.0001086578581363	0.000304242002781641	6.51947148817803e-05	8.69262865090403e-05	4.34631432545202e-05	4.34631432545202e-05	k__Fungi;p__Ascomycota;c__Eurotiomycetes;o__Verrucariales;f__Verrucariaceae
OTU_236	4.34631432545202e-05	0	4.34631432545202e-05	4.34631432545202e-05	2.17315716272601e-05	0.0001086578581363	6.51947148817803e-05	0.000434631432545202	8.69262865090403e-05	0.000804068150208623	0.000260778859527121	0.000565020862308762	0.000391168289290681	0.000130389429763561	0.000890994436717663	0.000412899860917942	0.000195584144645341	0.000152121001390821	0.000912726008344923	0.000260778859527121	6.51947148817803e-05	0.000260778859527121	0.000130389429763561	2.17315716272601e-05	0	8.69262865090403e-05	4.34631432545202e-05	6.51947148817803e-05	2.17315716272601e-05	0	0	0.000239047287899861	0	4.34631432545202e-05	0.000239047287899861	0.000347705146036161	k__Fungi;p__Ascomycota
OTU_237	6.51947148817803e-05	0.000130389429763561	0	0.000347705146036161	0.000130389429763561	6.51947148817803e-05	0.000130389429763561	0.0001086578581363	0	8.69262865090403e-05	0.000369436717663421	0.000130389429763561	0.000369436717663421	0.000152121001390821	0.000282510431154381	0.00139082058414465	0.000217315716272601	6.51947148817803e-05	0.0001086578581363	6.51947148817803e-05	8.69262865090403e-05	2.17315716272601e-05	0	4.34631432545202e-05	0	0	0.000304242002781641	0	0.000173852573018081	0.0001086578581363	6.51947148817803e-05	0.000217315716272601	4.34631432545202e-05	2.17315716272601e-05	4.34631432545202e-05	0.00202103616133519	k__Chloroplastida;p__Chlorophyta;c__Chlorophyceae;o__unidentified;f__unidentified;g__unidentified;s__Mychonastes_homosphaera
OTU_238	0.00162986787204451	0.000152121001390821	0.000239047287899861	0.000217315716272601	0.000304242002781641	0.000499826147426982	0.000130389429763561	2.17315716272601e-05	0.000217315716272601	2.17315716272601e-05	4.34631432545202e-05	0	0.000412899860917942	0	6.51947148817803e-05	6.51947148817803e-05	4.34631432545202e-05	0	0	0.000152121001390821	0	0	0	0.000239047287899861	2.17315716272601e-05	4.34631432545202e-05	0	6.51947148817803e-05	0.000282510431154381	4.34631432545202e-05	6.51947148817803e-05	6.51947148817803e-05	0.000456363004172462	0.0001086578581363	0	4.34631432545202e-05	k__Fungi;p__Ascomycota;c__Saccharomycetes;o__Saccharomycetales;f__Debaryomycetaceae;g__Babjeviella;s__Babjeviella_inositovora
OTU_239	0.000391168289290681	0.000152121001390821	0.000304242002781641	8.69262865090403e-05	0.0001086578581363	0.000130389429763561	0.00258605702364395	0	4.34631432545202e-05	4.34631432545202e-05	8.69262865090403e-05	8.69262865090403e-05	0.000152121001390821	2.17315716272601e-05	8.69262865090403e-05	4.34631432545202e-05	0	0	0	0	0	0	0.0001086578581363	2.17315716272601e-05	0	6.51947148817803e-05	2.17315716272601e-05	0.00236874130737135	0.000565020862308762	2.17315716272601e-05	8.69262865090403e-05	4.34631432545202e-05	6.51947148817803e-05	6.51947148817803e-05	0.000217315716272601	2.17315716272601e-05	k__Chloroplastida;p__Chlorophyta;c__Chlorophyceae;o__unidentified;f__unidentified
OTU_240	0	2.17315716272601e-05	0	4.34631432545202e-05	0.000130389429763561	0.000152121001390821	0.00176025730180807	0	0.000173852573018081	6.51947148817803e-05	0	0.000391168289290681	4.34631432545202e-05	0.0001086578581363	2.17315716272601e-05	0.000304242002781641	0.000651947148817803	4.34631432545202e-05	4.34631432545202e-05	6.51947148817803e-05	0.000217315716272601	0.000152121001390821	0.00123869958275382	2.17315716272601e-05	0.000543289290681502	0.000152121001390821	0.000239047287899861	4.34631432545202e-05	2.17315716272601e-05	0	0	0	0	6.51947148817803e-05	2.17315716272601e-05	0	k__Alveolata;p__Ciliophora;c__Spirotrichea;o__unidentified
OTU_241	0.000282510431154381	0.000325973574408901	0.000325973574408901	0.000325973574408901	0.000260778859527121	0.000391168289290681	0.000152121001390821	0.000152121001390821	0.00147774687065369	0	0	0	0	0	4.34631432545202e-05	0	0	0	0	0.000695410292072323	0	0	0	2.17315716272601e-05	0	0	2.17315716272601e-05	6.51947148817803e-05	0	0	0	0	0	0	0	0	k__Fungi;p__Ascomycota
OTU_242	0.000847531293463143	0.000543289290681502	0.000608484005563282	0.000869262865090403	0.000434631432545202	0.000912726008344923	0.000499826147426982	0.000282510431154381	0.000434631432545202	0.000152121001390821	0.000977920723226704	8.69262865090403e-05	0.000217315716272601	2.17315716272601e-05	4.34631432545202e-05	0.000217315716272601	6.51947148817803e-05	4.34631432545202e-05	4.34631432545202e-05	4.34631432545202e-05	6.51947148817803e-05	0.00173852573018081	0.000173852573018081	4.34631432545202e-05	2.17315716272601e-05	2.17315716272601e-05	8.69262865090403e-05	0.000239047287899861	0.000130389429763561	8.69262865090403e-05	0	0.000152121001390821	4.34631432545202e-05	6.51947148817803e-05	6.51947148817803e-05	0	k__Fungi;p__Chytridiomycota;c__Chytridiomycetes;o__Rhizophydiales;f__unidentified;g__uncultured
OTU_243	0.000173852573018081	0.000239047287899861	0.000173852573018081	0.000130389429763561	0.000325973574408901	6.51947148817803e-05	0.000651947148817803	0.000217315716272601	0.000434631432545202	8.69262865090403e-05	0.000304242002781641	0.000282510431154381	0.000456363004172462	0.000347705146036161	0.000369436717663421	0.000260778859527121	0.000347705146036161	0.000325973574408901	0.000217315716272601	0.000239047287899861	0.000565020862308762	0.000934457579972184	0.000890994436717663	0.000325973574408901	0.000586752433936022	0.000565020862308762	0.000260778859527121	0.000195584144645341	0.000195584144645341	0.000260778859527121	4.34631432545202e-05	4.34631432545202e-05	6.51947148817803e-05	6.51947148817803e-05	0.000325973574408901	4.34631432545202e-05	k__Alveolata;p__Ciliophora;c__Colpodea;o__Colpodida;f__unidentified;g__Hausmanniella;s__Hausmanniella_discoidea
OTU_244	0.000152121001390821	8.69262865090403e-05	0.000782336578581363	0.00158640472878999	0.000565020862308762	0.000543289290681502	0.00236874130737135	2.17315716272601e-05	0.00154294158553547	0	0.00154294158553547	0.000152121001390821	2.17315716272601e-05	4.34631432545202e-05	4.34631432545202e-05	0.000586752433936022	0.000173852573018081	8.69262865090403e-05	0	4.34631432545202e-05	0	4.34631432545202e-05	6.51947148817803e-05	0	0	4.34631432545202e-05	6.51947148817803e-05	0.00130389429763561	6.51947148817803e-05	0	0	0.000130389429763561	4.34631432545202e-05	2.17315716272601e-05	0.000347705146036161	6.51947148817803e-05	k__Stramenopiles;p__Xanthophyceae;c__unidentified;o__Tribonematales;f__unidentified;g__unidentified;s__Bumilleriopsis_filiformis
OTU_245	0.000478094575799722	0.000304242002781641	0.000456363004172462	0.000565020862308762	0.00104311543810848	0.00176025730180807	0.000673678720445063	0.000152121001390821	0.000195584144645341	2.17315716272601e-05	0.000152121001390821	0.000152121001390821	0.000130389429763561	0	0	8.69262865090403e-05	0.000173852573018081	0.000173852573018081	4.34631432545202e-05	2.17315716272601e-05	6.51947148817803e-05	2.17315716272601e-05	0.000347705146036161	4.34631432545202e-05	6.51947148817803e-05	4.34631432545202e-05	6.51947148817803e-05	0.00241220445062587	0.000260778859527121	6.51947148817803e-05	4.34631432545202e-05	0.000195584144645341	0.000195584144645341	0.000217315716272601	0	0	k__Chloroplastida;p__Phragmoplastophyta;c__unidentified;o__Zygnematales;f__unidentified;g__Cylindrocystis;s__Cylindrocystis_brebissonii
OTU_246	0.0001086578581363	0.0001086578581363	0	8.69262865090403e-05	4.34631432545202e-05	6.51947148817803e-05	4.34631432545202e-05	0	6.51947148817803e-05	0.00219488873435327	0	0.000173852573018081	8.69262865090403e-05	0.000239047287899861	0.000782336578581363	0.0001086578581363	6.51947148817803e-05	6.51947148817803e-05	0	4.34631432545202e-05	0.000195584144645341	0.000130389429763561	0.000825799721835883	0.000325973574408901	0.000521557719054242	0.000195584144645341	6.51947148817803e-05	6.51947148817803e-05	0.000152121001390821	0.0001086578581363	0.0001086578581363	8.69262865090403e-05	8.69262865090403e-05	0.000130389429763561	0.000565020862308762	0	k__Fungi;p__Basidiomycota;c__Tremellomycetidae;o__Tremellales;f__unidentified;g__Bullera;s__Bullera_pseudovariabilis
OTU_247	0.000565020862308762	8.69262865090403e-05	0.000195584144645341	0.000152121001390821	0.000586752433936022	0.000412899860917942	0.00102138386648122	0.000695410292072323	0.0001086578581363	0.000869262865090403	4.34631432545202e-05	0.000173852573018081	0.000304242002781641	0.000434631432545202	0.00836665507649513	0.000478094575799722	0.00226008344923505	0.000130389429763561	0.000130389429763561	0.000217315716272601	0.000434631432545202	0.000173852573018081	0.000890994436717663	0.000478094575799722	0.000608484005563282	0.00102138386648122	0.000195584144645341	8.69262865090403e-05	0.000456363004172462	0.000152121001390821	0.000173852573018081	0.0001086578581363	0.000325973574408901	0.000173852573018081	0.000173852573018081	6.51947148817803e-05	k__Fungi;p__Ascomycota;c__Sordariomycetes
OTU_248	0	0	4.34631432545202e-05	0	8.69262865090403e-05	0	0	0	0	0	0.00186891515994437	6.51947148817803e-05	2.17315716272601e-05	0.000239047287899861	0.000152121001390821	0	6.51947148817803e-05	2.17315716272601e-05	0	0	0.000152121001390821	0.000478094575799722	0	6.51947148817803e-05	8.69262865090403e-05	8.69262865090403e-05	0.000152121001390821	0	0	6.51947148817803e-05	6.51947148817803e-05	0	6.51947148817803e-05	2.17315716272601e-05	0.000195584144645341	4.34631432545202e-05	k__Chloroplastida;p__Chlorophyta;c__Chlorophyceae;o__unidentified;f__unidentified;g__Chlorosarcinopsis;s__Chlorosarcinopsis_sp._A_KF-2011
OTU_249	4.34631432545202e-05	0.000412899860917942	2.17315716272601e-05	4.34631432545202e-05	2.17315716272601e-05	0	2.17315716272601e-05	0	8.69262865090403e-05	4.34631432545202e-05	4.34631432545202e-05	0.000239047287899861	0.000304242002781641	0.00176025730180807	0.000260778859527121	0.000282510431154381	0.000195584144645341	6.51947148817803e-05	6.51947148817803e-05	0.000152121001390821	4.34631432545202e-05	0.000130389429763561	0.000304242002781641	0.0001086578581363	0.000391168289290681	8.69262865090403e-05	2.17315716272601e-05	2.17315716272601e-05	0.000325973574408901	0.000260778859527121	8.69262865090403e-05	2.17315716272601e-05	2.17315716272601e-05	2.17315716272601e-05	0	0	k__Chloroplastida;p__Chlorophyta;c__Chlorophyceae;o__unidentified;f__unidentified
OTU_250	6.51947148817803e-05	0.0001086578581363	8.69262865090403e-05	2.17315716272601e-05	0.0001086578581363	0.0001086578581363	0.00113004172461752	2.17315716272601e-05	0.000304242002781641	6.51947148817803e-05	0.000130389429763561	0.000217315716272601	0.000195584144645341	4.34631432545202e-05	8.69262865090403e-05	0.000173852573018081	6.51947148817803e-05	0.0001086578581363	0	8.69262865090403e-05	8.69262865090403e-05	0.000391168289290681	0.000239047287899861	0.0001086578581363	6.51947148817803e-05	8.69262865090403e-05	0.0001086578581363	0.000651947148817803	0.0001086578581363	0.000173852573018081	6.51947148817803e-05	4.34631432545202e-05	8.69262865090403e-05	0.000152121001390821	0.000195584144645341	0	k__Fungi;p__Basidiomycota;c__unidentified;o__Erythrobasidiales;f__unidentified;g__Bannoa;s__Bannoa_hahajimensis
OTU_251	0.000543289290681502	0.000130389429763561	0.000130389429763561	8.69262865090403e-05	8.69262865090403e-05	0	0.000782336578581363	0.000956189151599444	4.34631432545202e-05	0.00304242002781641	0.000217315716272601	0.00123869958275382	4.34631432545202e-05	0.0001086578581363	0.000760605006954103	0.000130389429763561	0.000130389429763561	2.17315716272601e-05	0	0.000152121001390821	0.000391168289290681	0.000173852573018081	0.00191237830319889	0.000717141863699583	0.00173852573018081	0.000456363004172462	0.000173852573018081	8.69262865090403e-05	0.000239047287899861	2.17315716272601e-05	4.34631432545202e-05	2.17315716272601e-05	0	0	0	2.17315716272601e-05	k__Alveolata;p__Ciliophora;c__Colpodea;o__Colpodida;f__unidentified
OTU_252	2.17315716272601e-05	6.51947148817803e-05	2.17315716272601e-05	8.69262865090403e-05	0.000130389429763561	6.51947148817803e-05	6.51947148817803e-05	0	0.00284683588317107	2.17315716272601e-05	2.17315716272601e-05	0.000412899860917942	4.34631432545202e-05	6.51947148817803e-05	0	2.17315716272601e-05	6.51947148817803e-05	0	0	4.34631432545202e-05	6.51947148817803e-05	0.0001086578581363	0.000347705146036161	6.51947148817803e-05	0.000630215577190542	0.000173852573018081	4.34631432545202e-05	6.51947148817803e-05	6.51947148817803e-05	2.17315716272601e-05	2.17315716272601e-05	8.69262865090403e-05	6.51947148817803e-05	8.69262865090403e-05	0.000130389429763561	0.000325973574408901	k__Chloroplastida;p__Chlorophyta;c__Ulvophyceae;o__unidentified;f__unidentified;g__unidentified;s__Printzina_lagenifera
OTU_253	6.51947148817803e-05	0	0	0	4.34631432545202e-05	0	0	0.000847531293463143	0	0.000391168289290681	0.0001086578581363	2.17315716272601e-05	0.000217315716272601	0.0001086578581363	4.34631432545202e-05	0.000391168289290681	8.69262865090403e-05	0	6.51947148817803e-05	2.17315716272601e-05	8.69262865090403e-05	4.34631432545202e-05	0.000782336578581363	0.00184718358831711	6.51947148817803e-05	6.51947148817803e-05	6.51947148817803e-05	2.17315716272601e-05	0.0001086578581363	0	0	2.17315716272601e-05	4.34631432545202e-05	0	0	0	k__Fungi;p__Basidiomycota;c__unidentified;o__Sporidiobolales;f__unidentified;g__Rhodotorula;s__Rhodotorula_mucilaginosa
OTU_254	6.51947148817803e-05	0.000152121001390821	0	0.000173852573018081	0.000195584144645341	0.000260778859527121	2.17315716272601e-05	6.51947148817803e-05	0.000977920723226704	2.17315716272601e-05	0	0.000282510431154381	0.000130389429763561	2.17315716272601e-05	0.000173852573018081	0	0.000173852573018081	0	4.34631432545202e-05	8.69262865090403e-05	0.000173852573018081	0.000173852573018081	0.000195584144645341	0.0001086578581363	0.000782336578581363	0.000239047287899861	8.69262865090403e-05	2.17315716272601e-05	2.17315716272601e-05	4.34631432545202e-05	6.51947148817803e-05	0.000130389429763561	0.0001086578581363	0	0	0	k__Fungi;p__Ascomycota;c__Sordariomycetes;o__Hypocreales;f__unidentified;g__unidentified;s__Hypocreales_sp._GMG_PPb3
OTU_255	0.000890994436717663	0.000195584144645341	0.000325973574408901	0.000217315716272601	0.000217315716272601	0.000325973574408901	0.000152121001390821	0.000304242002781641	6.51947148817803e-05	0.0001086578581363	8.69262865090403e-05	0.000152121001390821	0.000260778859527121	4.34631432545202e-05	2.17315716272601e-05	8.69262865090403e-05	6.51947148817803e-05	0.0001086578581363	6.51947148817803e-05	0	6.51947148817803e-05	0.000130389429763561	0.000173852573018081	6.51947148817803e-05	4.34631432545202e-05	6.51947148817803e-05	0	0.00113004172461752	0.000173852573018081	6.51947148817803e-05	2.17315716272601e-05	0	0	2.17315716272601e-05	0	0	k__Fungi
OTU_256	0.000934457579972184	0.000325973574408901	0.000282510431154381	0.000434631432545202	0.00245566759388039	0.000543289290681502	0.00269471488178025	0.000673678720445063	0.000239047287899861	0.000912726008344923	0.00104311543810848	0.000760605006954103	0.000478094575799722	0.000934457579972184	0.00104311543810848	0.000825799721835883	0.000651947148817803	0.000260778859527121	0.0001086578581363	0.000217315716272601	0.000173852573018081	0.000130389429763561	0.000738873435326843	0.000304242002781641	0.000673678720445063	0.000282510431154381	0.000260778859527121	0.000478094575799722	0.000499826147426982	0.000282510431154381	0.000325973574408901	0.000391168289290681	0.00113004172461752	0.000260778859527121	0.000586752433936022	0	k__Fungi;p__Basidiomycota;c__Tremellomycetidae;o__Tremellales;f__unidentified;g__Cryptococcus;s__Cryptococcus_dimennae
OTU_257	2.17315716272601e-05	0	2.17315716272601e-05	0	2.17315716272601e-05	8.69262865090403e-05	4.34631432545202e-05	0	0	0	0	0.000239047287899861	8.69262865090403e-05	4.34631432545202e-05	0.00152121001390821	0	0.0001086578581363	0	6.51947148817803e-05	4.34631432545202e-05	0	0.000217315716272601	6.51947148817803e-05	0.000847531293463143	0	0.000130389429763561	0	2.17315716272601e-05	0	0	2.17315716272601e-05	2.17315716272601e-05	0	0	0	0.000217315716272601	k__Fungi;p__Basidiomycota;c__Agaricostilbomycetes;o__Agaricostilbales;f__unidentified;g__Sporobolomyces
OTU_258	0	0	0	4.34631432545202e-05	4.34631432545202e-05	0.0001086578581363	2.17315716272601e-05	0	0	0.0001086578581363	0.00173852573018081	0.000130389429763561	8.69262865090403e-05	0.000369436717663421	0.0001086578581363	0.000195584144645341	0.000195584144645341	0.000630215577190542	2.17315716272601e-05	0.0001086578581363	2.17315716272601e-05	4.34631432545202e-05	4.34631432545202e-05	0	0.0001086578581363	0	8.69262865090403e-05	6.51947148817803e-05	8.69262865090403e-05	0	0	6.51947148817803e-05	8.69262865090403e-05	0.000173852573018081	0	4.34631432545202e-05	k__Fungi;p__Ascomycota;c__Sordariomycetes;o__Sordariales;f__unidentified;g__unidentified;s__uncultured_fungus
OTU_259	4.34631432545202e-05	4.34631432545202e-05	0	0	0	0	6.51947148817803e-05	0	0	4.34631432545202e-05	0	0	4.34631432545202e-05	8.69262865090403e-05	0	0	0	0	0	0	0	0.000347705146036161	0.000608484005563282	4.34631432545202e-05	0.00128216272600834	8.69262865090403e-05	6.51947148817803e-05	4.34631432545202e-05	0.000130389429763561	2.17315716272601e-05	0	0	4.34631432545202e-05	0	0	0	k__Fungi;p__Ascomycota
OTU_260	0	2.17315716272601e-05	0	0	0.0001086578581363	0	0	0	0.00745392906815021	0.000999652294853964	0.000217315716272601	0	0	0	0	0	0	0	0	6.51947148817803e-05	2.17315716272601e-05	0	0	0	0	0	0	0	0	0.000412899860917942	2.17315716272601e-05	0	0	2.17315716272601e-05	0.000347705146036161	0	k__Animalia;p__unidentified;c__unidentified;o__unidentified;f__unidentified;g__unidentified
OTU_261	0.000347705146036161	0.000369436717663421	0.000412899860917942	0.000456363004172462	0.000434631432545202	0.000412899860917942	0.000217315716272601	0.000130389429763561	0.000521557719054242	0	0	0.000847531293463143	0	0	0	0	0	0	0	0	0	0	0.00121696801112656	0	0	0	0	0.000717141863699583	0	0	0	0	0	0	0	0	k__Fungi
OTU_262	0	0	2.17315716272601e-05	2.17315716272601e-05	0	0	0.00315107788595271	0	0	0	0	0	0	0	0.0001086578581363	0	0	0	0	2.17315716272601e-05	4.34631432545202e-05	0	0.000217315716272601	2.17315716272601e-05	0.000434631432545202	0.000478094575799722	4.34631432545202e-05	0	0	0	2.17315716272601e-05	0	0	0	0	0	k__Chloroplastida;p__Streptophyta;c__Embryophyta
OTU_263	0.000325973574408901	0	0	0	0	0	4.34631432545202e-05	2.17315716272601e-05	0	0	4.34631432545202e-05	0	0.000478094575799722	0	0	2.17315716272601e-05	0	0	0	4.34631432545202e-05	0.000173852573018081	0.000369436717663421	0.000217315716272601	0.000673678720445063	0.000195584144645341	0.000217315716272601	0.000173852573018081	0	0.000412899860917942	0	0	0	2.17315716272601e-05	0	0	2.17315716272601e-05	k__Fungi;p__Ascomycota;c__Saccharomycetes;o__Saccharomycetales;f__unidentified;g__Candida;s__Candida_parapsilosis
OTU_264	0	0.0001086578581363	0	0.000282510431154381	2.17315716272601e-05	4.34631432545202e-05	0	0	0	0	0.000195584144645341	0.0001086578581363	0.000282510431154381	8.69262865090403e-05	0.000130389429763561	0.00193410987482615	0.000152121001390821	6.51947148817803e-05	0.0001086578581363	0.000130389429763561	0	0	0	2.17315716272601e-05	0	0	0.000369436717663421	0	6.51947148817803e-05	2.17315716272601e-05	0	0.000304242002781641	4.34631432545202e-05	0	0	0	k__Fungi;p__Ascomycota;c__Eurotiomycetes;o__Coryneliales;f__Coryneliaceae
OTU_266	0.000369436717663421	0.000934457579972184	0.000260778859527121	0.000325973574408901	0.000282510431154381	0.000478094575799722	0.000565020862308762	0.00247739916550765	0.0001086578581363	0.0011952364394993	0.000586752433936022	0.000412899860917942	0.000434631432545202	0.00543289290681502	0.00247739916550765	0.000608484005563282	0.000412899860917942	0.000152121001390821	0.000195584144645341	0.000195584144645341	0.00271644645340751	0.000673678720445063	0.000738873435326843	0.000934457579972184	0.000912726008344923	0.000956189151599444	0.000456363004172462	0.000304242002781641	0.00147774687065369	0.000499826147426982	0.000152121001390821	0.000217315716272601	2.17315716272601e-05	0.000130389429763561	0.000760605006954103	0.00345531988873435	k__Chloroplastida;p__Streptophyta;c__Embryophyta;o__Lamiales;f__unidentified
OTU_267	0.000325973574408901	0.000369436717663421	0.000651947148817803	0.000239047287899861	0.000260778859527121	0.000565020862308762	0.001086578581363	0.00102138386648122	2.17315716272601e-05	4.34631432545202e-05	0.000325973574408901	0.000304242002781641	0.0001086578581363	0.000130389429763561	8.69262865090403e-05	4.34631432545202e-05	6.51947148817803e-05	0	2.17315716272601e-05	0	4.34631432545202e-05	6.51947148817803e-05	8.69262865090403e-05	2.17315716272601e-05	2.17315716272601e-05	4.34631432545202e-05	4.34631432545202e-05	0.00280337273991655	8.69262865090403e-05	4.34631432545202e-05	4.34631432545202e-05	8.69262865090403e-05	6.51947148817803e-05	2.17315716272601e-05	0.000956189151599444	0.000130389429763561	k__Stramenopiles;p__Xanthophyceae;c__unidentified;o__Tribonematales;f__unidentified;g__Chlorellidium;s__Chlorellidium_tetrabotrys
OTU_268	2.17315716272601e-05	0	2.17315716272601e-05	0	0	0	0	0	0	0	0	0.00195584144645341	0.000152121001390821	0.000260778859527121	0.0001086578581363	0.000152121001390821	0.000130389429763561	0	6.51947148817803e-05	4.34631432545202e-05	4.34631432545202e-05	4.34631432545202e-05	0.000173852573018081	0.000999652294853964	0.000282510431154381	0.000195584144645341	0.000130389429763561	0.000217315716272601	6.51947148817803e-05	6.51947148817803e-05	0	2.17315716272601e-05	0	2.17315716272601e-05	0	0	k__Fungi;p__Basidiomycota;c__Agaricomycetes;o__unidentified;f__unidentified;g__Giulia;s__Giulia_tenuis
OTU_269	0.000347705146036161	0.000651947148817803	0.000521557719054242	0.000630215577190542	0.000717141863699583	0.000999652294853964	0.000847531293463143	0.000412899860917942	0.00110831015299026	0.000217315716272601	0.000673678720445063	0.00136908901251739	0.000586752433936022	0.000499826147426982	0.000738873435326843	0.000586752433936022	0.000478094575799722	0.000369436717663421	0.000478094575799722	0.000565020862308762	0.000152121001390821	0.000391168289290681	0.000347705146036161	0.000239047287899861	0.000586752433936022	0.000325973574408901	0.000239047287899861	0.000239047287899861	0.000717141863699583	0.000391168289290681	0.000282510431154381	0.000499826147426982	0.000565020862308762	0.000825799721835883	0.00191237830319889	0.00260778859527121	k__Fungi;p__Basidiomycota;c__Exobasidiomycetidae;o__Exobasidiales;f__Exobasidiaceae;g__Exobasidium;s__Exobasidium_rhododendri
OTU_270	0.000130389429763561	0	2.17315716272601e-05	0.0001086578581363	2.17315716272601e-05	6.51947148817803e-05	0	6.51947148817803e-05	0	0	0.000304242002781641	0	0.000217315716272601	0	4.34631432545202e-05	0.000239047287899861	4.34631432545202e-05	4.34631432545202e-05	0	2.17315716272601e-05	0	0	0.0001086578581363	0	6.51947148817803e-05	0	2.17315716272601e-05	4.34631432545202e-05	8.69262865090403e-05	0	0	0	2.17315716272601e-05	6.51947148817803e-05	0	0	k__Fungi;p__Basidiomycota;c__Tremellomycetidae;o__Filobasidiales;f__Filobasidiaceae;g__unidentified;s__Cryptococcus_vishniacii
OTU_271	0.000282510431154381	0.000260778859527121	0.000304242002781641	0.000478094575799722	0.000152121001390821	0.000325973574408901	0.000499826147426982	0.000521557719054242	0.000434631432545202	4.34631432545202e-05	4.34631432545202e-05	0	6.51947148817803e-05	2.17315716272601e-05	4.34631432545202e-05	0.0001086578581363	4.34631432545202e-05	0	0.000217315716272601	0.000130389429763561	0	8.69262865090403e-05	4.34631432545202e-05	0	6.51947148817803e-05	6.51947148817803e-05	0.000325973574408901	6.51947148817803e-05	0	0	8.69262865090403e-05	8.69262865090403e-05	6.51947148817803e-05	0	0.000130389429763561	0.000239047287899861	k__Fungi;p__Basidiomycota;c__unidentified;o__Pucciniales;f__Pucciniaceae
OTU_272	0.000325973574408901	0.000282510431154381	0.000499826147426982	0.000782336578581363	0.000543289290681502	0.00110831015299026	0.000260778859527121	0.000434631432545202	0.000195584144645341	4.34631432545202e-05	0.00586752433936022	0.000412899860917942	0.000195584144645341	0.000217315716272601	0.000217315716272601	0.00130389429763561	0.000347705146036161	0.000195584144645341	2.17315716272601e-05	0	6.51947148817803e-05	0.000347705146036161	0.000347705146036161	4.34631432545202e-05	0.000152121001390821	2.17315716272601e-05	0.000434631432545202	0.000456363004172462	0.000130389429763561	4.34631432545202e-05	4.34631432545202e-05	0.000217315716272601	0.000239047287899861	0.000239047287899861	4.34631432545202e-05	0	k__Chloroplastida;p__Chlorophyta;c__Chlorophyceae;o__unidentified;f__unidentified;g__Chlamydomonas;s__Chlamydomonas_reinhardtii
OTU_273	2.17315716272601e-05	4.34631432545202e-05	0	0	0	0	0	0	4.34631432545202e-05	0	0	0	4.34631432545202e-05	0.0001086578581363	2.17315716272601e-05	0	0	0	0	0	6.51947148817803e-05	0.0001086578581363	0.000195584144645341	0.00193410987482615	0.00143428372739917	0.0001086578581363	8.69262865090403e-05	0	6.51947148817803e-05	0.0001086578581363	0.0001086578581363	0	0	2.17315716272601e-05	0	0	k__Fungi;p__Basidiomycota;c__Exobasidiomycetidae
OTU_274	0.000282510431154381	0.000304242002781641	0.000347705146036161	0.000239047287899861	0.000369436717663421	0.000325973574408901	2.17315716272601e-05	0.00123869958275382	0.000239047287899861	0.000260778859527121	0.000195584144645341	0.000391168289290681	0.00143428372739917	0.000434631432545202	0.000239047287899861	0.000347705146036161	0.000325973574408901	0.000239047287899861	0.000130389429763561	0.000347705146036161	0.000869262865090403	0.00158640472878999	0.00102138386648122	0.00236874130737135	0.00299895688456189	0.00176025730180807	0.000304242002781641	0.000239047287899861	0.00141255215577191	0.000130389429763561	0.000412899860917942	0.000391168289290681	0.000152121001390821	0.000260778859527121	0.000391168289290681	0.000456363004172462	k__Fungi;p__Ascomycota;c__Sordariomycetes;o__Hypocreales;f__unidentified;g__unidentified;s__Balansia_sp._PVR1997
OTU_275	0	0	0.0001086578581363	4.34631432545202e-05	0	0	0	0	0	0	0.000304242002781641	0.00134735744089013	4.34631432545202e-05	0.000130389429763561	0.000130389429763561	6.51947148817803e-05	2.17315716272601e-05	4.34631432545202e-05	0	8.69262865090403e-05	6.51947148817803e-05	0.000130389429763561	8.69262865090403e-05	0	0.000173852573018081	0.000347705146036161	0.000173852573018081	0.000325973574408901	0.000152121001390821	6.51947148817803e-05	0.000217315716272601	8.69262865090403e-05	0.000152121001390821	8.69262865090403e-05	0.000347705146036161	2.17315716272601e-05	k__Fungi;p__Basidiomycota;c__Tremellomycetidae;o__Tremellales;f__unidentified;g__Bullera
OTU_276	0.000412899860917942	0.000282510431154381	0.000195584144645341	0.0001086578581363	0.000152121001390821	0.000130389429763561	2.17315716272601e-05	4.34631432545202e-05	4.34631432545202e-05	0	0.000869262865090403	0.000173852573018081	0.000260778859527121	6.51947148817803e-05	0.0001086578581363	0.0001086578581363	8.69262865090403e-05	4.34631432545202e-05	0	8.69262865090403e-05	0	2.17315716272601e-05	0.000130389429763561	6.51947148817803e-05	6.51947148817803e-05	0	0	2.17315716272601e-05	0.000260778859527121	6.51947148817803e-05	0.000173852573018081	2.17315716272601e-05	0	2.17315716272601e-05	0	0	k__Chloroplastida;p__Chlorophyta;c__Ulvophyceae;o__unidentified;f__unidentified
OTU_277	8.69262865090403e-05	0.000130389429763561	6.51947148817803e-05	0	4.34631432545202e-05	0	0	8.69262865090403e-05	2.17315716272601e-05	6.51947148817803e-05	0	2.17315716272601e-05	0.0001086578581363	0.000912726008344923	4.34631432545202e-05	0	4.34631432545202e-05	0	0	0	8.69262865090403e-05	2.17315716272601e-05	0.000195584144645341	2.17315716272601e-05	0.000239047287899861	0.000130389429763561	4.34631432545202e-05	0	0	0	0	0	0	0	0	0	k__Rhizaria;p__Cercozoa;c__Thecofilosea;o__Cryomonadida;f__Rhizaspididae;g__Rhogostoma
OTU_278	0.000325973574408901	0.000391168289290681	0.000217315716272601	0.000651947148817803	0.000673678720445063	0.000282510431154381	0.000478094575799722	0.000478094575799722	0.000152121001390821	4.34631432545202e-05	0	8.69262865090403e-05	0.000173852573018081	0.000586752433936022	0.000173852573018081	0.000456363004172462	0.000347705146036161	0.0001086578581363	0	2.17315716272601e-05	4.34631432545202e-05	2.17315716272601e-05	0.000325973574408901	4.34631432545202e-05	8.69262865090403e-05	0.000195584144645341	0.000304242002781641	0	4.34631432545202e-05	6.51947148817803e-05	4.34631432545202e-05	0.000282510431154381	4.34631432545202e-05	4.34631432545202e-05	0.000869262865090403	0	k__Chloroplastida;p__Chlorophyta;c__Trebouxiophyceae;o__unidentified;f__unidentified;g__Watanabea;s__Watanabea_reniformis
OTU_279	0	0	0	8.69262865090403e-05	0	0	4.34631432545202e-05	0	0	0	0	4.34631432545202e-05	0	8.69262865090403e-05	0	2.17315716272601e-05	0	0	0	0	2.17315716272601e-05	8.69262865090403e-05	2.17315716272601e-05	0.000738873435326843	6.51947148817803e-05	4.34631432545202e-05	0.0046288247566064	0	0	2.17315716272601e-05	0	4.34631432545202e-05	0	4.34631432545202e-05	0	0	k__Fungi;p__Ascomycota
OTU_280	0	0	0	6.51947148817803e-05	0	0	0	0	0	0	0	0	0	0	0	8.69262865090403e-05	0	0	0	0	0	4.34631432545202e-05	0.000130389429763561	6.51947148817803e-05	0	2.17315716272601e-05	0.00547635605006954	0	0	0	0	6.51947148817803e-05	0	0	0	0	k__Fungi;p__Basidiomycota;c__Agaricostilbomycetes;o__Agaricostilbales;f__unidentified;g__Sporobolomyces
OTU_281	8.69262865090403e-05	0.000173852573018081	2.17315716272601e-05	8.69262865090403e-05	0.000521557719054242	0.0001086578581363	0.0001086578581363	6.51947148817803e-05	4.34631432545202e-05	8.69262865090403e-05	0.0001086578581363	0.00180372044506259	0.000521557719054242	8.69262865090403e-05	6.51947148817803e-05	8.69262865090403e-05	0.000456363004172462	6.51947148817803e-05	0.000304242002781641	6.51947148817803e-05	0.000195584144645341	0.000499826147426982	0.000325973574408901	0.000130389429763561	0.000456363004172462	0.000282510431154381	0.0001086578581363	0.000347705146036161	0.000521557719054242	4.34631432545202e-05	0.000217315716272601	0.000217315716272601	0.000195584144645341	0.000217315716272601	4.34631432545202e-05	0.00167333101529903	k__Fungi;p__Ascomycota
OTU_282	4.34631432545202e-05	0	0	0	0	8.69262865090403e-05	0	0	0	0	0	0	4.34631432545202e-05	0	0	0	0	0	0	0	6.51947148817803e-05	4.34631432545202e-05	0.000956189151599444	0.00232527816411683	0.000130389429763561	2.17315716272601e-05	4.34631432545202e-05	2.17315716272601e-05	0.000391168289290681	0	2.17315716272601e-05	0	2.17315716272601e-05	2.17315716272601e-05	0	0	k__Fungi;p__Basidiomycota;c__Agaricostilbomycetes;o__Agaricostilbales;f__unidentified;g__Sporobolomyces;s__Sporobolomyces_diospyroris
OTU_283	8.69262865090403e-05	0	6.51947148817803e-05	8.69262865090403e-05	4.34631432545202e-05	0.000152121001390821	0	4.34631432545202e-05	0.0001086578581363	4.34631432545202e-05	4.34631432545202e-05	0.000369436717663421	0.000260778859527121	4.34631432545202e-05	4.34631432545202e-05	8.69262865090403e-05	0.000130389429763561	4.34631432545202e-05	0	4.34631432545202e-05	0.000152121001390821	0.000369436717663421	0.00104311543810848	0.000239047287899861	0.000239047287899861	6.51947148817803e-05	0.000130389429763561	6.51947148817803e-05	0.0001086578581363	0	0	4.34631432545202e-05	6.51947148817803e-05	0	0	4.34631432545202e-05	k__Fungi;p__Ascomycota;c__Eurotiomycetes;o__Chaetothyriales;f__Herpotrichiellaceae;g__unidentified;s__uncultured_fungal_contaminant
OTU_284	0.000304242002781641	0.0001086578581363	6.51947148817803e-05	0.000217315716272601	0.000152121001390821	0.000173852573018081	0.000369436717663421	6.51947148817803e-05	4.34631432545202e-05	0.000173852573018081	6.51947148817803e-05	0.000282510431154381	2.17315716272601e-05	4.34631432545202e-05	0	2.17315716272601e-05	4.34631432545202e-05	2.17315716272601e-05	0	0	8.69262865090403e-05	2.17315716272601e-05	0.000369436717663421	0.0001086578581363	8.69262865090403e-05	8.69262865090403e-05	0.000260778859527121	0.000325973574408901	0.000130389429763561	6.51947148817803e-05	6.51947148817803e-05	0.000152121001390821	8.69262865090403e-05	0.0001086578581363	0.0001086578581363	2.17315716272601e-05	k__Fungi;p__Basidiomycota;c__Tremellomycetidae;o__Cystofilobasidiales;f__Cystofilobasidiaceae;g__Itersonilia;s__Itersonilia_perplexans
OTU_285	2.17315716272601e-05	0	0	2.17315716272601e-05	8.69262865090403e-05	4.34631432545202e-05	4.34631432545202e-05	0.000825799721835883	0.000152121001390821	0.000239047287899861	0	0.000347705146036161	6.51947148817803e-05	8.69262865090403e-05	4.34631432545202e-05	0	0	0.0001086578581363	0	0	0.000152121001390821	0.000173852573018081	0.0001086578581363	6.51947148817803e-05	0.000195584144645341	0.000130389429763561	0.000130389429763561	0.000608484005563282	0	0	0.0001086578581363	4.34631432545202e-05	4.34631432545202e-05	4.34631432545202e-05	0.000456363004172462	0	k__Fungi;p__Basidiomycota;c__Tremellomycetidae;o__Tremellales;f__unidentified
OTU_286	0.000173852573018081	0.000130389429763561	8.69262865090403e-05	4.34631432545202e-05	8.69262865090403e-05	0.000130389429763561	0.000347705146036161	6.51947148817803e-05	0.000651947148817803	2.17315716272601e-05	2.17315716272601e-05	8.69262865090403e-05	0	0	0	0	0	0	2.17315716272601e-05	0.000173852573018081	4.34631432545202e-05	0.000152121001390821	0.000325973574408901	0.000130389429763561	6.51947148817803e-05	6.51947148817803e-05	8.69262865090403e-05	8.69262865090403e-05	0	0	0	8.69262865090403e-05	0	2.17315716272601e-05	0.000260778859527121	0	k__Animalia;p__Arthropoda;c__unidentified;o__Collembola;f__unidentified;g__unidentified;s__Sminthurinus_bimaculatus
OTU_287	0.000586752433936022	0.000347705146036161	0.000347705146036161	0.000695410292072323	0.000369436717663421	0.000521557719054242	0.000412899860917942	0.000282510431154381	0.000347705146036161	4.34631432545202e-05	0.00102138386648122	0	2.17315716272601e-05	0	0	0	0	0	0	4.34631432545202e-05	2.17315716272601e-05	0.00102138386648122	0	0	0	0	2.17315716272601e-05	0	0	0	0	0	0	0	0	0	k__Fungi;p__Chytridiomycota;c__Chytridiomycetes;o__Rhizophydiales;f__unidentified;g__Rhizophydium;s__uncultured_fungus
OTU_288	0.000173852573018081	0	0	0	8.69262865090403e-05	0	0	0	0	4.34631432545202e-05	8.69262865090403e-05	4.34631432545202e-05	0.000173852573018081	0	0	0	0.0001086578581363	0	0	0	0	0	6.51947148817803e-05	0.000173852573018081	0	0	0	0.000804068150208623	0.00106484700973574	0.000152121001390821	0.000195584144645341	8.69262865090403e-05	0.00173852573018081	0.000173852573018081	2.17315716272601e-05	4.34631432545202e-05	k__Fungi;p__Ascomycota
OTU_289	0.000586752433936022	6.51947148817803e-05	0.000152121001390821	4.34631432545202e-05	0.000325973574408901	0.000173852573018081	0.000195584144645341	0.000195584144645341	4.34631432545202e-05	0.000130389429763561	0.000325973574408901	0.000173852573018081	0.000956189151599444	0.000239047287899861	0.000217315716272601	0.000456363004172462	0.000456363004172462	0.000152121001390821	0.000282510431154381	0.000195584144645341	0.000304242002781641	0.000565020862308762	0.000391168289290681	0.000695410292072323	0.000347705146036161	0.000565020862308762	0.000282510431154381	0.000130389429763561	0.000673678720445063	6.51947148817803e-05	0.000260778859527121	0.0001086578581363	0.000260778859527121	0.000173852573018081	0.0001086578581363	0.000195584144645341	k__Fungi;p__Basidiomycota;c__unidentified;o__Septobasidiales;f__Septobasidiaceae;g__Septobasidium;s__Septobasidium_burtii
OTU_290	0.000195584144645341	0.000195584144645341	0.0001086578581363	0.0001086578581363	2.17315716272601e-05	0.000152121001390821	2.17315716272601e-05	0.0001086578581363	0.000173852573018081	4.34631432545202e-05	0.00317280945757997	0.000130389429763561	0.000630215577190542	0.000152121001390821	4.34631432545202e-05	0	2.17315716272601e-05	0	4.34631432545202e-05	2.17315716272601e-05	0.000173852573018081	0.000478094575799722	0.000173852573018081	0.000347705146036161	0.00297722531293463	0.000325973574408901	0.000173852573018081	0.000173852573018081	0.000195584144645341	0.0001086578581363	0.000217315716272601	0.0001086578581363	8.69262865090403e-05	0.000130389429763561	8.69262865090403e-05	0.00104311543810848	k__Fungi;p__Ascomycota;c__Sordariomycetes;o__Xylariales;f__Xylariaceae;g__Xylaria
OTU_291	2.17315716272601e-05	0	0	0	0	0	0	0	0	0	0	2.17315716272601e-05	0.000173852573018081	0	0	0	0	4.34631432545202e-05	0	6.51947148817803e-05	0	0	0	4.34631432545202e-05	0	0	0	0	0.000195584144645341	0	0	0	0	0	0	0	k__Fungi;p__Basidiomycota;c__Exobasidiomycetidae;o__Malasseziales;f__unidentified;g__Malassezia
OTU_292	0	0	0	2.17315716272601e-05	4.34631432545202e-05	0	0	0	0	0	0.00286856745479833	4.34631432545202e-05	6.51947148817803e-05	6.51947148817803e-05	6.51947148817803e-05	0.000782336578581363	0.000478094575799722	0	4.34631432545202e-05	2.17315716272601e-05	0	8.69262865090403e-05	0	0	0.0001086578581363	0	4.34631432545202e-05	0	0	6.51947148817803e-05	0	6.51947148817803e-05	4.34631432545202e-05	0	0	0	k__Fungi;p__unidentified;c__unidentified;o__unidentified;f__unidentified;g__uncultured;s__Amoeboaphelidium_protococcarum
OTU_293	0	0.0001086578581363	0.000152121001390821	0	2.17315716272601e-05	0	0.000217315716272601	0	0	0	0	0	2.17315716272601e-05	2.17315716272601e-05	0.0001086578581363	0	0	4.34631432545202e-05	0	0	0.0001086578581363	6.51947148817803e-05	4.34631432545202e-05	2.17315716272601e-05	0.000478094575799722	0.000412899860917942	6.51947148817803e-05	0	4.34631432545202e-05	0.0001086578581363	8.69262865090403e-05	0	0	0	6.51947148817803e-05	0	k__Fungi;p__Ascomycota
OTU_294	0.000456363004172462	0.0001086578581363	4.34631432545202e-05	0.000282510431154381	0.000130389429763561	0.000282510431154381	2.17315716272601e-05	8.69262865090403e-05	6.51947148817803e-05	4.34631432545202e-05	0	8.69262865090403e-05	0.000130389429763561	0	0	2.17315716272601e-05	2.17315716272601e-05	4.34631432545202e-05	0	0	2.17315716272601e-05	6.51947148817803e-05	0.000912726008344923	2.17315716272601e-05	6.51947148817803e-05	2.17315716272601e-05	6.51947148817803e-05	0.000956189151599444	0.0001086578581363	0	2.17315716272601e-05	0.0001086578581363	0	0.000130389429763561	0	4.34631432545202e-05	k__Fungi;p__Basidiomycota;c__Agaricomycetes
OTU_295	0	2.17315716272601e-05	8.69262865090403e-05	0.0001086578581363	6.51947148817803e-05	0.0001086578581363	8.69262865090403e-05	0.000651947148817803	0.000130389429763561	0.000195584144645341	0.000890994436717663	0.000173852573018081	0.000130389429763561	0	8.69262865090403e-05	0.000304242002781641	6.51947148817803e-05	8.69262865090403e-05	0.000130389429763561	6.51947148817803e-05	0.0001086578581363	0.000239047287899861	0.000260778859527121	8.69262865090403e-05	6.51947148817803e-05	0.000239047287899861	0.000195584144645341	0.000565020862308762	0.0001086578581363	6.51947148817803e-05	2.17315716272601e-05	0.0001086578581363	2.17315716272601e-05	2.17315716272601e-05	2.17315716272601e-05	4.34631432545202e-05	k__Fungi;p__Ascomycota;c__Sordariomycetes;o__Boliniales;f__Boliniaceae;g__Lentomitella;s__Lentomitella_cirrhosa
OTU_296	4.34631432545202e-05	8.69262865090403e-05	0	2.17315716272601e-05	0.000217315716272601	0.000152121001390821	0.000173852573018081	0	4.34631432545202e-05	0	0	0.0001086578581363	0	4.34631432545202e-05	4.34631432545202e-05	6.51947148817803e-05	0.000152121001390821	2.17315716272601e-05	4.34631432545202e-05	2.17315716272601e-05	0.0001086578581363	6.51947148817803e-05	8.69262865090403e-05	4.34631432545202e-05	0.000695410292072323	0.000282510431154381	0.000130389429763561	2.17315716272601e-05	4.34631432545202e-05	2.17315716272601e-05	0	4.34631432545202e-05	6.51947148817803e-05	4.34631432545202e-05	0.000347705146036161	0.000391168289290681	k__Chloroplastida;p__Chlorophyta;c__Trebouxiophyceae;o__unidentified;f__unidentified;g__Asterochloris;s__uncultured_Eimeriidae
OTU_297	0	0	0	4.34631432545202e-05	6.51947148817803e-05	2.17315716272601e-05	0	8.69262865090403e-05	0	0.000456363004172462	0.00445497218358832	2.17315716272601e-05	0	0	0	0.000152121001390821	0.000130389429763561	0	0	2.17315716272601e-05	0	4.34631432545202e-05	0	0	0	0	4.34631432545202e-05	0	2.17315716272601e-05	0	0	0	0	2.17315716272601e-05	0	0	k__Stramenopiles;p__Xanthophyceae;c__unidentified;o__Tribonematales;f__unidentified;g__Sphaerosorus;s__Sphaerosorus_composita
OTU_298	0.0001086578581363	6.51947148817803e-05	0.0001086578581363	0.000239047287899861	0.000195584144645341	0.00123869958275382	2.17315716272601e-05	4.34631432545202e-05	0.00113004172461752	0	0	0	2.17315716272601e-05	0	4.34631432545202e-05	6.51947148817803e-05	0	4.34631432545202e-05	0	6.51947148817803e-05	8.69262865090403e-05	0.000152121001390821	0	2.17315716272601e-05	0.0001086578581363	0	6.51947148817803e-05	0.000130389429763561	0.000282510431154381	2.17315716272601e-05	6.51947148817803e-05	0.000217315716272601	2.17315716272601e-05	0.000152121001390821	0	0.00147774687065369	k__Fungi;p__Ascomycota
OTU_299	2.17315716272601e-05	4.34631432545202e-05	4.34631432545202e-05	0	4.34631432545202e-05	2.17315716272601e-05	4.34631432545202e-05	0	0	2.17315716272601e-05	0	0.000304242002781641	0.0001086578581363	6.51947148817803e-05	4.34631432545202e-05	6.51947148817803e-05	0.0001086578581363	0	0	4.34631432545202e-05	6.51947148817803e-05	0.000347705146036161	0.0001086578581363	0	0.000239047287899861	6.51947148817803e-05	6.51947148817803e-05	0.000934457579972184	8.69262865090403e-05	0.000499826147426982	6.51947148817803e-05	2.17315716272601e-05	0	0.0001086578581363	0	0.000999652294853964	k__Fungi;p__Basidiomycota;c__Agaricostilbomycetes;o__unidentified;f__unidentified;g__unidentified;s__Mycogloea_sp._TUB_FO40962
OTU_301	0.000130389429763561	2.17315716272601e-05	0	2.17315716272601e-05	4.34631432545202e-05	8.69262865090403e-05	0	0	4.34631432545202e-05	4.34631432545202e-05	0.000195584144645341	0.000673678720445063	2.17315716272601e-05	2.17315716272601e-05	2.17315716272601e-05	4.34631432545202e-05	4.34631432545202e-05	0	0	6.51947148817803e-05	6.51947148817803e-05	4.34631432545202e-05	2.17315716272601e-05	0	6.51947148817803e-05	0.000130389429763561	0	0.000890994436717663	0.000173852573018081	6.51947148817803e-05	4.34631432545202e-05	2.17315716272601e-05	6.51947148817803e-05	0.000173852573018081	0.000260778859527121	2.17315716272601e-05	k__Fungi;p__Ascomycota
OTU_302	0	2.17315716272601e-05	0	0	0.0001086578581363	0	0	0	0	0.000217315716272601	6.51947148817803e-05	0	0	0	0	6.51947148817803e-05	4.34631432545202e-05	0	4.34631432545202e-05	0	0	2.17315716272601e-05	0	2.17315716272601e-05	0	0	0.000934457579972184	0	0.000260778859527121	0.000152121001390821	8.69262865090403e-05	6.51947148817803e-05	0.00147774687065369	2.17315716272601e-05	2.17315716272601e-05	0.000977920723226704	k__Animalia;p__unidentified;c__unidentified;o__unidentified;f__unidentified;g__unidentified;s__unidentified
OTU_303	0.000391168289290681	0.000217315716272601	0.000217315716272601	0.000369436717663421	0.000434631432545202	0.0001086578581363	0.00152121001390821	0.000543289290681502	8.69262865090403e-05	8.69262865090403e-05	0.000282510431154381	0.000260778859527121	0.000391168289290681	0.000325973574408901	0.000130389429763561	0.000695410292072323	0.000608484005563282	0.000173852573018081	6.51947148817803e-05	0.000173852573018081	0.000195584144645341	0.000217315716272601	0.000217315716272601	0.000130389429763561	0.000521557719054242	0.000325973574408901	0.000369436717663421	0.000369436717663421	0.000586752433936022	0.000347705146036161	0.000130389429763561	0.000499826147426982	0.000369436717663421	0.000217315716272601	2.17315716272601e-05	4.34631432545202e-05	k__Fungi;p__Ascomycota;c__Sordariomycetes;o__Diaporthales;f__Valsaceae;g__unidentified;s__Ophiognomonia_clavigignenti-juglandacearum
OTU_304	0	0.000456363004172462	0	0	0	6.51947148817803e-05	0	0	0	0	0	6.51947148817803e-05	0.000173852573018081	0.00165159944367177	0.000239047287899861	0.000282510431154381	0.000130389429763561	0.0001086578581363	0	8.69262865090403e-05	0	0	2.17315716272601e-05	0	0.000499826147426982	0	0	0	0	0.000239047287899861	2.17315716272601e-05	0	0	0	0	0.0001086578581363	k__Chloroplastida;p__Chlorophyta;c__Chlorophyceae;o__unidentified;f__unidentified
OTU_305	4.34631432545202e-05	0	0	0	0	0	0	0	8.69262865090403e-05	2.17315716272601e-05	0	2.17315716272601e-05	0	4.34631432545202e-05	2.17315716272601e-05	0.0001086578581363	4.34631432545202e-05	0	4.34631432545202e-05	0.000152121001390821	0.000760605006954103	0.000195584144645341	0.000804068150208623	4.34631432545202e-05	0.000543289290681502	6.51947148817803e-05	0.0001086578581363	0	0	4.34631432545202e-05	0	6.51947148817803e-05	0	2.17315716272601e-05	0	0	k__Fungi;p__Ascomycota
OTU_306	0.000499826147426982	0.000565020862308762	0.000260778859527121	0.000782336578581363	0.000434631432545202	0.000804068150208623	0.000282510431154381	0.000130389429763561	0.000630215577190542	0	0.000608484005563282	0.000217315716272601	0	4.34631432545202e-05	6.51947148817803e-05	0	0	4.34631432545202e-05	2.17315716272601e-05	0.000152121001390821	0	0.000630215577190542	0.000499826147426982	0	0	2.17315716272601e-05	2.17315716272601e-05	0.000391168289290681	0	2.17315716272601e-05	6.51947148817803e-05	2.17315716272601e-05	0	2.17315716272601e-05	0	0	k__Fungi;p__unidentified;c__unidentified;o__unidentified;f__unidentified;g__uncultured;s__uncultured_Chytridiomycota
OTU_307	0.000282510431154381	0.000304242002781641	4.34631432545202e-05	0.000586752433936022	0.000173852573018081	0.000217315716272601	0.000651947148817803	6.51947148817803e-05	0.0001086578581363	2.17315716272601e-05	0.000565020862308762	0.000260778859527121	0.000304242002781641	0.000565020862308762	8.69262865090403e-05	0.000586752433936022	0.000130389429763561	0	4.34631432545202e-05	0.0001086578581363	0.000173852573018081	2.17315716272601e-05	0.000173852573018081	0.0001086578581363	0.000630215577190542	8.69262865090403e-05	0.000260778859527121	6.51947148817803e-05	0.000173852573018081	0.000130389429763561	4.34631432545202e-05	0.000152121001390821	4.34631432545202e-05	4.34631432545202e-05	0.000630215577190542	4.34631432545202e-05	k__Fungi;p__Ascomycota;c__Dothideomycetes
OTU_308	0	0	0	0	0	0	0	0	0	0	0	0	0	0	0.00349878303198887	0	2.17315716272601e-05	0	0	0	8.69262865090403e-05	0	0	0	0	0.0001086578581363	0	0	0	0	0	0	0	0	0	0	k__Animalia;p__Arthropoda;c__unidentified;o__Collembola;f__unidentified;g__unidentified;s__Stemonitis_splendens
OTU_309	0.000217315716272601	0.000260778859527121	0.000651947148817803	0	0.000152121001390821	0.000152121001390821	0.000499826147426982	2.17315716272601e-05	4.34631432545202e-05	2.17315716272601e-05	6.51947148817803e-05	8.69262865090403e-05	0.000195584144645341	6.51947148817803e-05	0.000152121001390821	6.51947148817803e-05	0	6.51947148817803e-05	0	2.17315716272601e-05	0.000630215577190542	0.000130389429763561	0.000760605006954103	0.000173852573018081	0.000304242002781641	0.000586752433936022	6.51947148817803e-05	4.34631432545202e-05	0.000347705146036161	4.34631432545202e-05	0.000217315716272601	0.0001086578581363	6.51947148817803e-05	4.34631432545202e-05	0.000347705146036161	2.17315716272601e-05	k__Chloroplastida;p__Chlorophyta;c__Trebouxiophyceae;o__unidentified;f__unidentified;g__Trebouxia;s__uncultured_eukaryote
OTU_310	0.0001086578581363	0	0	0	0	0	0	0	0.000130389429763561	4.34631432545202e-05	8.69262865090403e-05	8.69262865090403e-05	0.000152121001390821	0	0	0	0	0	2.17315716272601e-05	6.51947148817803e-05	0	0	0.000282510431154381	0.000173852573018081	0	4.34631432545202e-05	0	0.00132562586926287	0.00113004172461752	0.0001086578581363	4.34631432545202e-05	0.000130389429763561	6.51947148817803e-05	0.0001086578581363	0	0.000195584144645341	k__Fungi;p__Ascomycota;c__Lecanoromycetes;o__unidentified;f__unidentified;g__unidentified
OTU_311	2.17315716272601e-05	8.69262865090403e-05	4.34631432545202e-05	0	0	4.34631432545202e-05	0	0	0	0	0	0.000478094575799722	6.51947148817803e-05	0.000217315716272601	8.69262865090403e-05	0	0	0	0	0	2.17315716272601e-05	4.34631432545202e-05	0.000673678720445063	0.00130389429763561	0.000412899860917942	0.000130389429763561	6.51947148817803e-05	6.51947148817803e-05	0.000325973574408901	0.000325973574408901	4.34631432545202e-05	6.51947148817803e-05	0	0	6.51947148817803e-05	0	k__Fungi;p__Basidiomycota;c__Exobasidiomycetidae;o__Exobasidiales
OTU_312	0	0	0	0	0	0	0	0	0	0	0.00554155076495132	0	0	0	0	0	0	0	0	0	0	6.51947148817803e-05	0	0	0	0	0	6.51947148817803e-05	0	0	0	0	0	4.34631432545202e-05	0	0	k__Stramenopiles;p__Diatomea;c__Bacillariophyceae;o__unidentified;f__unidentified;g__Fistulifera
OTU_313	0.000412899860917942	0.000325973574408901	0.000369436717663421	0.000586752433936022	0.000434631432545202	0.000651947148817803	0.000282510431154381	0.000195584144645341	0.000565020862308762	2.17315716272601e-05	0	0.000478094575799722	0	0	2.17315716272601e-05	6.51947148817803e-05	0	0	0	0	0	0	0.000695410292072323	0	0	0	0	0.000630215577190542	0	0	0	0	0	0	0	0	Unclassified
OTU_314	0.000130389429763561	0.00149947844228095	0.000173852573018081	0.000130389429763561	0.000217315716272601	0.000217315716272601	8.69262865090403e-05	2.17315716272601e-05	0.0001086578581363	0.00282510431154381	6.51947148817803e-05	0.0001086578581363	4.34631432545202e-05	0.000152121001390821	0.0001086578581363	0.000173852573018081	2.17315716272601e-05	6.51947148817803e-05	0	0.000130389429763561	0.000869262865090403	4.34631432545202e-05	6.51947148817803e-05	0.000152121001390821	0.000673678720445063	0.000130389429763561	6.51947148817803e-05	0.00115177329624478	0.000347705146036161	8.69262865090403e-05	4.34631432545202e-05	0.000195584144645341	8.69262865090403e-05	0.000130389429763561	0	2.17315716272601e-05	k__Chloroplastida;p__Streptophyta;c__Embryophyta;o__Cornales;f__unidentified;g__unidentified;s__Cornus_officinalis
OTU_316	0	2.17315716272601e-05	4.34631432545202e-05	4.34631432545202e-05	6.51947148817803e-05	4.34631432545202e-05	0.00184718358831711	0.00230354659248957	6.51947148817803e-05	0	4.34631432545202e-05	0	2.17315716272601e-05	0	0	0	0	0	0	0	0	0	0	0	0	0	0	0	6.51947148817803e-05	0	0	0	0	0	0	0	k__Chloroplastida;p__Chlorophyta;c__Chlorophyceae;o__unidentified;f__unidentified;g__Chlamydomonas
OTU_317	8.69262865090403e-05	2.17315716272601e-05	0.0001086578581363	6.51947148817803e-05	0.000130389429763561	6.51947148817803e-05	2.17315716272601e-05	4.34631432545202e-05	0.00482440890125174	0	0	0	0	0.000130389429763561	2.17315716272601e-05	8.69262865090403e-05	0.000130389429763561	0	0	0.000239047287899861	0	0	0	2.17315716272601e-05	6.51947148817803e-05	8.69262865090403e-05	0	2.17315716272601e-05	2.17315716272601e-05	4.34631432545202e-05	6.51947148817803e-05	0.000152121001390821	2.17315716272601e-05	0	0.000391168289290681	0	k__Fungi;p__Ascomycota;c__Lecanoromycetes;o__unidentified;f__unidentified;g__unidentified
OTU_319	8.69262865090403e-05	6.51947148817803e-05	6.51947148817803e-05	2.17315716272601e-05	4.34631432545202e-05	4.34631432545202e-05	0	0	0	8.69262865090403e-05	2.17315716272601e-05	0.000217315716272601	0.000195584144645341	8.69262865090403e-05	6.51947148817803e-05	0.000130389429763561	2.17315716272601e-05	4.34631432545202e-05	6.51947148817803e-05	0	0	4.34631432545202e-05	8.69262865090403e-05	0.00167333101529903	8.69262865090403e-05	6.51947148817803e-05	6.51947148817803e-05	2.17315716272601e-05	0	0	4.34631432545202e-05	6.51947148817803e-05	0	8.69262865090403e-05	0	0	k__Fungi;p__Ascomycota;c__Lecanoromycetes;o__unidentified;f__unidentified;g__unidentified;s__Scoliciosporum_umbrinum
OTU_320	2.17315716272601e-05	2.17315716272601e-05	8.69262865090403e-05	4.34631432545202e-05	0.000456363004172462	6.51947148817803e-05	6.51947148817803e-05	0	0.000760605006954103	0.00156467315716273	4.34631432545202e-05	0.000173852573018081	4.34631432545202e-05	0	4.34631432545202e-05	2.17315716272601e-05	8.69262865090403e-05	0	2.17315716272601e-05	2.17315716272601e-05	4.34631432545202e-05	4.34631432545202e-05	0.000282510431154381	2.17315716272601e-05	0.000152121001390821	4.34631432545202e-05	8.69262865090403e-05	0	2.17315716272601e-05	0	6.51947148817803e-05	0	6.51947148817803e-05	0	0.000195584144645341	2.17315716272601e-05	k__Chloroplastida;p__Chlorophyta;c__Ulvophyceae;o__unidentified;f__unidentified;g__Printzina;s__Printzina_bosseae
OTU_321	0.000239047287899861	4.34631432545202e-05	4.34631432545202e-05	0	4.34631432545202e-05	2.17315716272601e-05	6.51947148817803e-05	0	0.000152121001390821	8.69262865090403e-05	6.51947148817803e-05	0	0.000478094575799722	4.34631432545202e-05	0	0	0	0	0	8.69262865090403e-05	4.34631432545202e-05	0.000173852573018081	6.51947148817803e-05	0.000282510431154381	0.000239047287899861	8.69262865090403e-05	0.000130389429763561	4.34631432545202e-05	0.000282510431154381	4.34631432545202e-05	0	6.51947148817803e-05	4.34631432545202e-05	2.17315716272601e-05	2.17315716272601e-05	8.69262865090403e-05	k__Fungi;p__Basidiomycota;c__Wallemiomycetes;o__Wallemiales;f__unidentified;g__Wallemia;s__Wallemia_muriae
OTU_322	6.51947148817803e-05	0	8.69262865090403e-05	0.0001086578581363	6.51947148817803e-05	0.0001086578581363	0	2.17315716272601e-05	2.17315716272601e-05	0	0	6.51947148817803e-05	6.51947148817803e-05	4.34631432545202e-05	0	2.17315716272601e-05	0	0	0	2.17315716272601e-05	8.69262865090403e-05	2.17315716272601e-05	0.00241220445062587	0.0001086578581363	0.000412899860917942	6.51947148817803e-05	0.000130389429763561	0.000130389429763561	0	6.51947148817803e-05	0	8.69262865090403e-05	0	0	0	0	k__Fungi;p__Basidiomycota;c__Tremellomycetidae;o__Tremellales;f__unidentified
OTU_323	0	0	0	0.000325973574408901	0	0	2.17315716272601e-05	0	0	0	0	0.000130389429763561	0.000260778859527121	0.000130389429763561	0.000173852573018081	0.0011952364394993	0.000325973574408901	6.51947148817803e-05	2.17315716272601e-05	2.17315716272601e-05	0	2.17315716272601e-05	0	4.34631432545202e-05	8.69262865090403e-05	0	0.000369436717663421	0	2.17315716272601e-05	0	0	0.000195584144645341	0	0	0	0	k__Fungi;p__Ascomycota;c__Eurotiomycetes;o__Coryneliales;f__Coryneliaceae;g__Caliciopsis
OTU_324	0.00167333101529903	0.000651947148817803	0.00249913073713491	0.00471575104311544	0.000412899860917942	0.000586752433936022	0.00219488873435327	0.00667159248956885	0.000173852573018081	0.000173852573018081	0.000260778859527121	0.000130389429763561	0.000195584144645341	6.51947148817803e-05	0.000282510431154381	0.000760605006954103	6.51947148817803e-05	4.34631432545202e-05	0.000152121001390821	6.51947148817803e-05	0.000130389429763561	6.51947148817803e-05	6.51947148817803e-05	6.51947148817803e-05	4.34631432545202e-05	0.0001086578581363	0.000260778859527121	0	0.000434631432545202	0.000239047287899861	4.34631432545202e-05	0.0001086578581363	0.000890994436717663	0	0.000369436717663421	8.69262865090403e-05	k__Rhizaria;p__Cercozoa;c__Thecofilosea;o__Amb-18S-431;f__unidentified;g__unidentified;s__uncultured_eukaryote
OTU_325	8.69262865090403e-05	6.51947148817803e-05	0	0.000173852573018081	2.17315716272601e-05	4.34631432545202e-05	4.34631432545202e-05	0	2.17315716272601e-05	0.0001086578581363	4.34631432545202e-05	8.69262865090403e-05	0.000239047287899861	0.000282510431154381	0.000152121001390821	0.000521557719054242	0.000478094575799722	4.34631432545202e-05	4.34631432545202e-05	0	6.51947148817803e-05	2.17315716272601e-05	0.000152121001390821	4.34631432545202e-05	2.17315716272601e-05	0	0.000130389429763561	2.17315716272601e-05	0.000173852573018081	0	0	0.000173852573018081	6.51947148817803e-05	0	0	0	k__Fungi;p__Ascomycota;c__Sordariomycetes;o__Hypocreales;f__unidentified;g__Stilbella;s__Stilbella_fimetaria
OTU_326	0.000152121001390821	4.34631432545202e-05	0.000130389429763561	6.51947148817803e-05	6.51947148817803e-05	6.51947148817803e-05	0.000152121001390821	0.0001086578581363	0	0.000217315716272601	0.000304242002781641	6.51947148817803e-05	0.000217315716272601	8.69262865090403e-05	2.17315716272601e-05	2.17315716272601e-05	6.51947148817803e-05	6.51947148817803e-05	6.51947148817803e-05	0	0.000239047287899861	0.000239047287899861	0.000217315716272601	0.000239047287899861	0.000195584144645341	0.000325973574408901	6.51947148817803e-05	8.69262865090403e-05	0.000173852573018081	4.34631432545202e-05	2.17315716272601e-05	8.69262865090403e-05	8.69262865090403e-05	4.34631432545202e-05	4.34631432545202e-05	0.000173852573018081	k__Fungi;p__Ascomycota;c__Eurotiomycetes;o__Chaetothyriales;f__Herpotrichiellaceae
OTU_327	0	0	0	0.000217315716272601	0	0	2.17315716272601e-05	0	0	0	0	0	0	0	0	0.000608484005563282	0	0	0	0	0.000130389429763561	0.000282510431154381	0.0001086578581363	0.000195584144645341	0.000260778859527121	0.000173852573018081	0.00110831015299026	0	0	0	0	0.000239047287899861	0	0	0	0	k__Alveolata;p__Ciliophora;c__Oligohymenophorea;o__Conthreep;f__unidentified;g__unidentified;s__uncultured_alveolate
OTU_328	2.17315716272601e-05	6.51947148817803e-05	0	0.000282510431154381	0	6.51947148817803e-05	2.17315716272601e-05	0	0	0	0	0	4.34631432545202e-05	0	0	0.000282510431154381	0	2.17315716272601e-05	0	2.17315716272601e-05	0.000173852573018081	8.69262865090403e-05	0	0.0001086578581363	4.34631432545202e-05	4.34631432545202e-05	0.00334666203059805	0	0	0	0	0.0001086578581363	0	4.34631432545202e-05	0	0	k__Fungi;p__Ascomycota
OTU_329	6.51947148817803e-05	0	0	0.000152121001390821	6.51947148817803e-05	0	0	0	6.51947148817803e-05	4.34631432545202e-05	0.000152121001390821	0	0.000152121001390821	2.17315716272601e-05	4.34631432545202e-05	0.000304242002781641	6.51947148817803e-05	6.51947148817803e-05	6.51947148817803e-05	0.000130389429763561	0.0001086578581363	0.000499826147426982	0.000260778859527121	0.000391168289290681	0.000347705146036161	0.000434631432545202	0.000847531293463143	0	8.69262865090403e-05	0	0	0.000239047287899861	0	0	0	0	k__Fungi;p__Ascomycota;c__Saccharomycetes;o__Saccharomycetales;f__Dipodascaceae;g__Galactomyces;s__uncultured_Geotrichum
OTU_330	0.000434631432545202	4.34631432545202e-05	4.34631432545202e-05	6.51947148817803e-05	0.000999652294853964	0.000347705146036161	6.51947148817803e-05	8.69262865090403e-05	0	0	0.000152121001390821	0.000130389429763561	0.00106484700973574	0.000195584144645341	0.0001086578581363	0.000260778859527121	0.000260778859527121	0.000195584144645341	0.000152121001390821	0.000130389429763561	6.51947148817803e-05	8.69262865090403e-05	2.17315716272601e-05	0.000239047287899861	4.34631432545202e-05	0	4.34631432545202e-05	0	0.000391168289290681	0	0	0	0.000173852573018081	4.34631432545202e-05	8.69262865090403e-05	0	k__Fungi;p__Ascomycota
OTU_331	6.51947148817803e-05	0.000152121001390821	0.000239047287899861	0.000130389429763561	0.000239047287899861	0.0001086578581363	6.51947148817803e-05	6.51947148817803e-05	0.00173852573018081	2.17315716272601e-05	0	0.000239047287899861	0	8.69262865090403e-05	0.000130389429763561	6.51947148817803e-05	4.34631432545202e-05	0	2.17315716272601e-05	4.34631432545202e-05	0	0.0001086578581363	0	0	0.000195584144645341	0.000195584144645341	6.51947148817803e-05	4.34631432545202e-05	0.0001086578581363	6.51947148817803e-05	0.000391168289290681	0.000130389429763561	6.51947148817803e-05	0	4.34631432545202e-05	0.000304242002781641	k__Chloroplastida;p__Chlorophyta;c__Trebouxiophyceae;o__unidentified;f__unidentified;g__Asterochloris;s__Asterochloris_erici
OTU_332	0.000130389429763561	0	4.34631432545202e-05	6.51947148817803e-05	0.000195584144645341	0.000173852573018081	4.34631432545202e-05	0.000260778859527121	0.000282510431154381	4.34631432545202e-05	8.69262865090403e-05	4.34631432545202e-05	4.34631432545202e-05	2.17315716272601e-05	0	4.34631432545202e-05	0.000130389429763561	2.17315716272601e-05	0	0.000152121001390821	2.17315716272601e-05	0	0	2.17315716272601e-05	0.000130389429763561	6.51947148817803e-05	6.51947148817803e-05	4.34631432545202e-05	0.000173852573018081	6.51947148817803e-05	0	6.51947148817803e-05	0.000695410292072323	4.34631432545202e-05	0.000195584144645341	8.69262865090403e-05	k__Fungi;p__Ascomycota;c__Leotiomycetes;o__Helotiales;f__Helotiaceae;g__unidentified;s__uncultured_Ascomycota
OTU_333	0.000391168289290681	0.000152121001390821	0.000173852573018081	0.000478094575799722	0.000260778859527121	0.000239047287899861	0.000282510431154381	0.000130389429763561	0.0001086578581363	2.17315716272601e-05	0.000717141863699583	0.000651947148817803	2.17315716272601e-05	0	6.51947148817803e-05	0.000543289290681502	0.000239047287899861	6.51947148817803e-05	0	0	8.69262865090403e-05	0.000325973574408901	0.000521557719054242	0	4.34631432545202e-05	6.51947148817803e-05	0.00212969401947149	0.000478094575799722	0.000217315716272601	0	0	6.51947148817803e-05	0	2.17315716272601e-05	0.000130389429763561	0	k__Stramenopiles;p__Diatomea;c__Bacillariophyceae;o__unidentified;f__unidentified;g__Nitzschia
OTU_334	0	0	0	4.34631432545202e-05	0	0	0	0	0	0	0	0	0	0	0	0.000412899860917942	0	0	0	0	6.51947148817803e-05	8.69262865090403e-05	0.0001086578581363	2.17315716272601e-05	0	0.000347705146036161	0.0053894297635605	0	0	0	0	4.34631432545202e-05	0	0	0	0	k__Animalia;p__Arthropoda;c__Arachnida;o__unidentified;f__unidentified;g__unidentified;s__Amblyseius_sp._APGD-2010
OTU_335	0	0	0	0	0	0	0	0	0	6.51947148817803e-05	0.00304242002781641	0	0	0	0	0	0	0	0	0	0	4.34631432545202e-05	0	0	6.51947148817803e-05	0	4.34631432545202e-05	4.34631432545202e-05	2.17315716272601e-05	0	2.17315716272601e-05	2.17315716272601e-05	0	0	6.51947148817803e-05	4.34631432545202e-05	k__Chloroplastida;p__Chlorophyta;c__Chlorophyceae;o__unidentified;f__unidentified;g__Radiococcus;s__Radiococcus_sp._WJT43VFNP6
OTU_336	0	8.69262865090403e-05	6.51947148817803e-05	6.51947148817803e-05	0.0001086578581363	0	6.51947148817803e-05	0	0	0	0	0	0	0.0001086578581363	0	0.0001086578581363	4.34631432545202e-05	4.34631432545202e-05	0	0	0.000130389429763561	0.0001086578581363	6.51947148817803e-05	0.000152121001390821	0.00289029902642559	0.000173852573018081	0.000282510431154381	0	0	0.000130389429763561	6.51947148817803e-05	6.51947148817803e-05	4.34631432545202e-05	4.34631432545202e-05	0	2.17315716272601e-05	k__Chloroplastida;p__Streptophyta;c__Embryophyta
OTU_337	0.000521557719054242	2.17315716272601e-05	4.34631432545202e-05	2.17315716272601e-05	4.34631432545202e-05	0.000152121001390821	0.000239047287899861	4.34631432545202e-05	0.0001086578581363	2.17315716272601e-05	0.0001086578581363	0	0.000260778859527121	6.51947148817803e-05	0	2.17315716272601e-05	4.34631432545202e-05	2.17315716272601e-05	2.17315716272601e-05	0	0.000478094575799722	0.00182545201668985	0.000543289290681502	0.00178198887343533	0.000369436717663421	0.000369436717663421	0.000260778859527121	2.17315716272601e-05	0.000130389429763561	4.34631432545202e-05	0	0	0	0.000130389429763561	8.69262865090403e-05	4.34631432545202e-05	k__Alveolata;p__Apicomplexa;c__Gregarinasina;o__Eugregarinorida;f__unidentified
OTU_338	0.000130389429763561	6.51947148817803e-05	0.000521557719054242	4.34631432545202e-05	2.17315716272601e-05	0.000195584144645341	6.51947148817803e-05	8.69262865090403e-05	2.17315716272601e-05	0.00167333101529903	0.0001086578581363	2.17315716272601e-05	0.000347705146036161	6.51947148817803e-05	0.000173852573018081	2.17315716272601e-05	4.34631432545202e-05	8.69262865090403e-05	8.69262865090403e-05	0	2.17315716272601e-05	0	0	0.000608484005563282	0.000239047287899861	0.000325973574408901	0.000130389429763561	6.51947148817803e-05	0.000586752433936022	6.51947148817803e-05	0.0001086578581363	2.17315716272601e-05	8.69262865090403e-05	0.000152121001390821	2.17315716272601e-05	0.00171679415855355	k__Chloroplastida;p__Streptophyta;c__Embryophyta;o__Solanales;f__unidentified;g__unidentified;s__Brassica_rapa
OTU_339	0	0	0	0	0.000152121001390821	0	0.000347705146036161	0	2.17315716272601e-05	8.69262865090403e-05	8.69262865090403e-05	6.51947148817803e-05	2.17315716272601e-05	8.69262865090403e-05	0	4.34631432545202e-05	0.000260778859527121	0	2.17315716272601e-05	4.34631432545202e-05	0	0	6.51947148817803e-05	2.17315716272601e-05	0	0	2.17315716272601e-05	0.0001086578581363	8.69262865090403e-05	0.000130389429763561	0.0001086578581363	0.000173852573018081	0.000347705146036161	0.000173852573018081	0.000239047287899861	0.000130389429763561	k__Fungi;p__Basidiomycota;c__unidentified
OTU_340	0.0001086578581363	0	4.34631432545202e-05	6.51947148817803e-05	8.69262865090403e-05	2.17315716272601e-05	4.34631432545202e-05	6.51947148817803e-05	0.000738873435326843	0	0	0.00143428372739917	0.0001086578581363	6.51947148817803e-05	0.00117350486787204	6.51947148817803e-05	2.17315716272601e-05	8.69262865090403e-05	0	8.69262865090403e-05	0	4.34631432545202e-05	6.51947148817803e-05	0	0	8.69262865090403e-05	0	6.51947148817803e-05	0	0	0	0	0	0	0	0	Unclassified
OTU_341	0.0001086578581363	0	8.69262865090403e-05	0	4.34631432545202e-05	0.00186891515994437	0	4.34631432545202e-05	0	0	4.34631432545202e-05	4.34631432545202e-05	2.17315716272601e-05	0	0	0	0	0	0	0	0.000673678720445063	0.000304242002781641	4.34631432545202e-05	0.000782336578581363	4.34631432545202e-05	0.0001086578581363	0	0	0.000195584144645341	0	0.000260778859527121	8.69262865090403e-05	0	2.17315716272601e-05	0.000173852573018081	0	k__Chloroplastida;p__Streptophyta;c__Liliopsida;o__Magnoliophyta;f__unidentified;g__Oryza;s__unidentified
OTU_343	0.0001086578581363	0.0001086578581363	0.0001086578581363	0	2.17315716272601e-05	4.34631432545202e-05	2.17315716272601e-05	0	0	4.34631432545202e-05	0	0	8.69262865090403e-05	0.000152121001390821	2.17315716272601e-05	6.51947148817803e-05	4.34631432545202e-05	2.17315716272601e-05	0	0	0.000195584144645341	0.000347705146036161	0.000173852573018081	0.000173852573018081	0.00180372044506259	0.000304242002781641	4.34631432545202e-05	0	0	0	0	6.51947148817803e-05	4.34631432545202e-05	4.34631432545202e-05	0	0	k__Fungi;p__Ascomycota
OTU_344	0.000478094575799722	0	2.17315716272601e-05	4.34631432545202e-05	0	0	4.34631432545202e-05	0	0	4.34631432545202e-05	0	2.17315716272601e-05	0.000434631432545202	0	4.34631432545202e-05	0	0	0	2.17315716272601e-05	0	8.69262865090403e-05	0.0001086578581363	6.51947148817803e-05	0.000434631432545202	4.34631432545202e-05	0.000173852573018081	0	0	0.000239047287899861	0	6.51947148817803e-05	6.51947148817803e-05	0	0	0	0	k__Alveolata;p__Ciliophora;c__Colpodea;o__Colpodida;f__unidentified
OTU_345	0.000239047287899861	6.51947148817803e-05	0.0001086578581363	0.000152121001390821	0.000130389429763561	0.000304242002781641	0.00141255215577191	0.000760605006954103	0.00178198887343533	0	0.0001086578581363	0.000717141863699583	6.51947148817803e-05	0	0	0.000173852573018081	2.17315716272601e-05	4.34631432545202e-05	0	0.000152121001390821	2.17315716272601e-05	6.51947148817803e-05	6.51947148817803e-05	0	0	6.51947148817803e-05	6.51947148817803e-05	4.34631432545202e-05	0.000260778859527121	4.34631432545202e-05	0	0.000173852573018081	6.51947148817803e-05	0.0001086578581363	0.000347705146036161	4.34631432545202e-05	k__Fungi;p__Basidiomycota;c__unidentified
OTU_346	0	2.17315716272601e-05	0	0	0	0	0	0.00269471488178025	6.51947148817803e-05	4.34631432545202e-05	0	6.51947148817803e-05	0	0	0	0	0	0	6.51947148817803e-05	0	0.000304242002781641	0	6.51947148817803e-05	0	0	0	0	0	0	0	0	0	0	6.51947148817803e-05	0	6.51947148817803e-05	k__Chloroplastida;p__Streptophyta;c__Embryophyta;o__Ranunculales;f__unidentified;g__Naravelia;s__Naravelia_laurifolia
OTU_347	0	0	0	0	0	4.34631432545202e-05	0	0	0	0.00221662030598053	0	6.51947148817803e-05	4.34631432545202e-05	0.000130389429763561	0	8.69262865090403e-05	0	0	0	0	8.69262865090403e-05	0	6.51947148817803e-05	0	0.000152121001390821	6.51947148817803e-05	0	4.34631432545202e-05	0	8.69262865090403e-05	0	2.17315716272601e-05	8.69262865090403e-05	0	0	4.34631432545202e-05	k__Fungi;p__Ascomycota
OTU_348	8.69262865090403e-05	4.34631432545202e-05	0	0	0	6.51947148817803e-05	0.000347705146036161	0.000977920723226704	0	0.000673678720445063	4.34631432545202e-05	0.0001086578581363	0	0	0	2.17315716272601e-05	2.17315716272601e-05	0	0	0	0	0.000499826147426982	6.51947148817803e-05	2.17315716272601e-05	2.17315716272601e-05	4.34631432545202e-05	2.17315716272601e-05	0	4.34631432545202e-05	2.17315716272601e-05	6.51947148817803e-05	0	0	0	0	0	k__Fungi;p__Basidiomycota;c__Agaricostilbomycetes;o__Agaricostilbales
OTU_349	6.51947148817803e-05	8.69262865090403e-05	8.69262865090403e-05	0.0001086578581363	0.0001086578581363	0.0001086578581363	0	0	0.000608484005563282	0.000130389429763561	6.51947148817803e-05	4.34631432545202e-05	2.17315716272601e-05	6.51947148817803e-05	4.34631432545202e-05	8.69262865090403e-05	4.34631432545202e-05	0	6.51947148817803e-05	2.17315716272601e-05	4.34631432545202e-05	0.000195584144645341	0.000152121001390821	4.34631432545202e-05	0.000239047287899861	0.000217315716272601	2.17315716272601e-05	2.17315716272601e-05	0	4.34631432545202e-05	2.17315716272601e-05	6.51947148817803e-05	8.69262865090403e-05	0.000130389429763561	0	0	k__Fungi;p__Basidiomycota;c__Tremellomycetidae;o__Tremellales;f__unidentified;g__Bullera;s__Bullera_setariae
OTU_350	4.34631432545202e-05	8.69262865090403e-05	0	4.34631432545202e-05	6.51947148817803e-05	8.69262865090403e-05	0	2.17315716272601e-05	0.00291203059805285	4.34631432545202e-05	0	2.17315716272601e-05	6.51947148817803e-05	2.17315716272601e-05	0	0	0	0	0	8.69262865090403e-05	0	0.000152121001390821	0	0	2.17315716272601e-05	0	0	2.17315716272601e-05	4.34631432545202e-05	0	0	4.34631432545202e-05	0	6.51947148817803e-05	0	0	k__Eukaryota;p__LKM11;c__unidentified;o__unidentified;f__unidentified;g__unidentified;s__uncultured_eukaryote
OTU_351	0.000456363004172462	0.000934457579972184	0.000173852573018081	0.000217315716272601	0.000173852573018081	0.000282510431154381	4.34631432545202e-05	0	0.000956189151599444	0	0.00623696105702364	0.000391168289290681	0.000804068150208623	4.34631432545202e-05	2.17315716272601e-05	0.000673678720445063	0.000325973574408901	0.000195584144645341	6.51947148817803e-05	8.69262865090403e-05	0	0.000195584144645341	0	4.34631432545202e-05	2.17315716272601e-05	0	6.51947148817803e-05	2.17315716272601e-05	0.0001086578581363	0.000217315716272601	0	8.69262865090403e-05	2.17315716272601e-05	6.51947148817803e-05	2.17315716272601e-05	0	k__Stramenopiles;p__Diatomea;c__Bacillariophyceae;o__unidentified;f__unidentified;g__Fistulifera
OTU_352	0.000239047287899861	0.000152121001390821	0.000304242002781641	0.000304242002781641	0.000130389429763561	0.000456363004172462	0.00123869958275382	0.000673678720445063	0	0	0.000521557719054242	8.69262865090403e-05	0.0001086578581363	2.17315716272601e-05	2.17315716272601e-05	0.000152121001390821	0	6.51947148817803e-05	0	6.51947148817803e-05	0	0	0	0	8.69262865090403e-05	6.51947148817803e-05	2.17315716272601e-05	6.51947148817803e-05	0.000282510431154381	0	4.34631432545202e-05	2.17315716272601e-05	4.34631432545202e-05	2.17315716272601e-05	0.000391168289290681	0	k__Stramenopiles;p__Xanthophyceae;c__unidentified;o__Tribonematales;f__unidentified;g__Heterothrix;s__Heterothrix_debilis
OTU_353	0.000195584144645341	4.34631432545202e-05	6.51947148817803e-05	6.51947148817803e-05	0.000130389429763561	0.000239047287899861	2.17315716272601e-05	0.00145601529902643	4.34631432545202e-05	0	2.17315716272601e-05	6.51947148817803e-05	4.34631432545202e-05	2.17315716272601e-05	0	2.17315716272601e-05	0	0	0	0	2.17315716272601e-05	0	4.34631432545202e-05	0	0	0	0	0.00126043115438108	0	0	0	8.69262865090403e-05	0	0	0.000499826147426982	4.34631432545202e-05	k__Stramenopiles;p__Xanthophyceae;c__unidentified;o__Tribonematales;f__unidentified;g__unidentified;s__uncultured_stramenopile
OTU_354	4.34631432545202e-05	0.000282510431154381	0.0001086578581363	8.69262865090403e-05	0.0001086578581363	0.000152121001390821	6.51947148817803e-05	0	0.00143428372739917	0	8.69262865090403e-05	0.000217315716272601	0.0001086578581363	0	8.69262865090403e-05	0.000325973574408901	6.51947148817803e-05	8.69262865090403e-05	0	0.0001086578581363	0.0001086578581363	0.000456363004172462	0.000434631432545202	8.69262865090403e-05	0.00130389429763561	0.000239047287899861	0.00219488873435327	0	0.000282510431154381	0	2.17315716272601e-05	6.51947148817803e-05	4.34631432545202e-05	2.17315716272601e-05	0.000260778859527121	0	k__Alveolata;p__Ciliophora;c__Colpodea;o__Conthreep;f__unidentified;g__Platyophrya
OTU_356	0.000391168289290681	0.000347705146036161	0.000282510431154381	0.000412899860917942	0.000434631432545202	0.000173852573018081	0.00189064673157163	0.000456363004172462	0.00289029902642559	0.000130389429763561	0.000152121001390821	0.000369436717663421	0.000304242002781641	0.000260778859527121	0.000217315716272601	0.000239047287899861	0.000586752433936022	0.000130389429763561	6.51947148817803e-05	0.000130389429763561	0.000239047287899861	0.000412899860917942	0.000565020862308762	0.000695410292072323	8.69262865090403e-05	0.000325973574408901	0.000217315716272601	0.00328146731571627	0.000847531293463143	0.000152121001390821	0.000195584144645341	0.000217315716272601	0.000130389429763561	6.51947148817803e-05	0.000260778859527121	0.000391168289290681	k__Chloroplastida;p__Chlorophyta;c__Trebouxiophyceae;o__unidentified;f__unidentified;g__Chlorella;s__Heterochlorella_luteoviridis
OTU_357	4.34631432545202e-05	4.34631432545202e-05	0	0	8.69262865090403e-05	0	0	0	0	0	0	0	6.51947148817803e-05	4.34631432545202e-05	0	0	4.34631432545202e-05	0	0	0	0.0001086578581363	4.34631432545202e-05	4.34631432545202e-05	0.0001086578581363	0.000869262865090403	6.51947148817803e-05	2.17315716272601e-05	0	4.34631432545202e-05	0	0	0	2.17315716272601e-05	0	0	0	k__Fungi;p__Ascomycota
OTU_358	0.000195584144645341	4.34631432545202e-05	0.000130389429763561	0.0001086578581363	2.17315716272601e-05	6.51947148817803e-05	0.000869262865090403	4.34631432545202e-05	0.0001086578581363	0.000499826147426982	0	6.51947148817803e-05	6.51947148817803e-05	4.34631432545202e-05	0	2.17315716272601e-05	0.0001086578581363	2.17315716272601e-05	0	4.34631432545202e-05	0.000173852573018081	0.000130389429763561	0.000173852573018081	0.000130389429763561	0.000304242002781641	0.000130389429763561	4.34631432545202e-05	4.34631432545202e-05	0.000282510431154381	6.51947148817803e-05	6.51947148817803e-05	0.0001086578581363	0.000130389429763561	0.0001086578581363	0	0.000586752433936022	k__Fungi;p__Ascomycota;c__Sordariomycetes;o__Sordariales;f__Chaetosphaeriaceae;g__Kionochaeta;s__uncultured_rhizosphere_ascomycete
OTU_359	0.000195584144645341	0.000173852573018081	8.69262865090403e-05	6.51947148817803e-05	0.000130389429763561	4.34631432545202e-05	0.000869262865090403	2.17315716272601e-05	0.00156467315716273	0.000173852573018081	0.000130389429763561	0.0001086578581363	0.000239047287899861	4.34631432545202e-05	0.0001086578581363	0.000195584144645341	0.000152121001390821	6.51947148817803e-05	6.51947148817803e-05	0.000130389429763561	0.000217315716272601	4.34631432545202e-05	2.17315716272601e-05	6.51947148817803e-05	2.17315716272601e-05	0	0	0	8.69262865090403e-05	0	4.34631432545202e-05	0	4.34631432545202e-05	2.17315716272601e-05	0.000239047287899861	0	k__Fungi;p__Ascomycota;c__Sordariomycetes;o__Sordariales
OTU_360	0.0001086578581363	0.0001086578581363	8.69262865090403e-05	0.000173852573018081	8.69262865090403e-05	0.0001086578581363	0	0	0.00247739916550765	0	0	4.34631432545202e-05	0	0	0	0	0	0	0	0.000173852573018081	0	0	8.69262865090403e-05	0	0	0	0	0.000304242002781641	6.51947148817803e-05	0	4.34631432545202e-05	4.34631432545202e-05	4.34631432545202e-05	4.34631432545202e-05	2.17315716272601e-05	0	k__Fungi;p__Basidiomycota;c__Agaricomycetes;o__Corticiales;f__Corticiaceae;g__Sistotrema
OTU_361	0	0	0	0	0	0	0	0	2.17315716272601e-05	0	0	0	0	0	0	0	0	0	0	6.51947148817803e-05	4.34631432545202e-05	0	4.34631432545202e-05	2.17315716272601e-05	4.34631432545202e-05	8.69262865090403e-05	4.34631432545202e-05	0	0	0	0	0	0	0	0	0	k__Chloroplastida;p__Streptophyta;c__Liliopsida;o__Magnoliophyta;f__unidentified
OTU_362	0.000217315716272601	0.000239047287899861	0.000760605006954103	0.000347705146036161	0.0001086578581363	0.000217315716272601	0.0001086578581363	2.17315716272601e-05	8.69262865090403e-05	0	0.000195584144645341	4.34631432545202e-05	6.51947148817803e-05	4.34631432545202e-05	0.000173852573018081	0.000130389429763561	8.69262865090403e-05	2.17315716272601e-05	0	0	4.34631432545202e-05	0	0	0	2.17315716272601e-05	0.000239047287899861	4.34631432545202e-05	0	0	0	0.000152121001390821	4.34631432545202e-05	0	4.34631432545202e-05	0	0	k__Chloroplastida;p__Chlorophyta;c__Chlorophyceae;o__unidentified;f__unidentified;g__unidentified;s__Chlamydomonadaceae_sp._NDem_9/21_T-14w
OTU_364	4.34631432545202e-05	0	4.34631432545202e-05	4.34631432545202e-05	2.17315716272601e-05	4.34631432545202e-05	0	4.34631432545202e-05	0	0	0	6.51947148817803e-05	0	0	0	6.51947148817803e-05	0	0	4.34631432545202e-05	0	0	0	2.17315716272601e-05	0	0	4.34631432545202e-05	2.17315716272601e-05	0	2.17315716272601e-05	2.17315716272601e-05	6.51947148817803e-05	2.17315716272601e-05	0	4.34631432545202e-05	0	0.00323800417246175	k__Chloroplastida;p__Chlorophyta;c__Chlorophyceae;o__unidentified;f__unidentified
OTU_365	0.000369436717663421	0	0	0	0	0	0	0	0	0	0	0	0.000499826147426982	0	0	0	2.17315716272601e-05	0	0	0	0	0	0	0.000412899860917942	0	0	0	0	0.000391168289290681	0	0	0	0	0	0	0	k__Fungi;p__Ascomycota;c__Saccharomycetes;o__Saccharomycetales;f__unidentified;g__Candida;s__Candida_membranifaciens
OTU_366	0.000173852573018081	0.000130389429763561	0.000130389429763561	0.000195584144645341	6.51947148817803e-05	0.000282510431154381	2.17315716272601e-05	0	4.34631432545202e-05	0.000347705146036161	0.000152121001390821	0	8.69262865090403e-05	4.34631432545202e-05	8.69262865090403e-05	8.69262865090403e-05	8.69262865090403e-05	2.17315716272601e-05	2.17315716272601e-05	4.34631432545202e-05	0.000304242002781641	8.69262865090403e-05	8.69262865090403e-05	0.00173852573018081	0.000521557719054242	8.69262865090403e-05	6.51947148817803e-05	0	0.000217315716272601	4.34631432545202e-05	6.51947148817803e-05	8.69262865090403e-05	4.34631432545202e-05	6.51947148817803e-05	0	0	k__Fungi;p__Basidiomycota;c__Agaricomycetes;o__Agaricales;f__Tricholomataceae;g__Panellus;s__Panellus_stypticus
OTU_367	0.000478094575799722	0.000499826147426982	6.51947148817803e-05	0.000282510431154381	0.000282510431154381	0.000260778859527121	0.000434631432545202	0.000130389429763561	0.000956189151599444	0.000173852573018081	0.000521557719054242	0.000456363004172462	0.00110831015299026	0.000521557719054242	0.000456363004172462	0.000695410292072323	0.000282510431154381	0.000282510431154381	0.000130389429763561	0.000152121001390821	0.000869262865090403	0.000695410292072323	0.000651947148817803	0.00113004172461752	0.00547635605006954	0.00130389429763561	0.000521557719054242	0.00199930458970793	0.00123869958275382	0.000239047287899861	0.000260778859527121	0.000412899860917942	0.00123869958275382	0.000217315716272601	8.69262865090403e-05	0.000130389429763561	k__Fungi;p__Ascomycota;c__Dothideomycetes;o__Pleosporales
OTU_368	0.000304242002781641	0.000412899860917942	0.000152121001390821	0.000391168289290681	0.000260778859527121	0.000239047287899861	0.000282510431154381	0.000391168289290681	0.000130389429763561	2.17315716272601e-05	0.000239047287899861	0.000325973574408901	0.000130389429763561	0	6.51947148817803e-05	0.000304242002781641	0.000173852573018081	0	0.000130389429763561	6.51947148817803e-05	6.51947148817803e-05	0.000217315716272601	0.000173852573018081	0	0	4.34631432545202e-05	0	8.69262865090403e-05	8.69262865090403e-05	0	0	6.51947148817803e-05	2.17315716272601e-05	2.17315716272601e-05	0	0.0001086578581363	k__Stramenopiles;p__Diatomea;c__Bacillariophyceae;o__unidentified;f__unidentified;g__Pinnularia;s__Pinnularia_nodosa
OTU_369	4.34631432545202e-05	8.69262865090403e-05	8.69262865090403e-05	2.17315716272601e-05	2.17315716272601e-05	0	4.34631432545202e-05	0	0.00104311543810848	4.34631432545202e-05	0	0.000173852573018081	2.17315716272601e-05	0	0	0	0	0	0	8.69262865090403e-05	0.000391168289290681	0	0	0	2.17315716272601e-05	0.000130389429763561	6.51947148817803e-05	0	0	0	0	0	0	2.17315716272601e-05	0	0.000130389429763561	k__Chloroplastida;p__Streptophyta;c__Embryophyta;o__Laurales;f__unidentified;g__Laurus;s__Laurus_nobilis
OTU_370	0.000130389429763561	0	0	0	2.17315716272601e-05	2.17315716272601e-05	0.000282510431154381	0	0	0	2.17315716272601e-05	0	0.0001086578581363	0	2.17315716272601e-05	2.17315716272601e-05	0	0	2.17315716272601e-05	0	6.51947148817803e-05	0	2.17315716272601e-05	0.000521557719054242	4.34631432545202e-05	4.34631432545202e-05	0	0	0	4.34631432545202e-05	0	0	0	0	0	0	k__Alveolata;p__Ciliophora;c__Nassophorea;o__Conthreep;f__unidentified;g__Obertrumia;s__Obertrumia_georgiana
OTU_372	0.000738873435326843	0.000260778859527121	0.000195584144645341	0.000391168289290681	0.000282510431154381	0.000651947148817803	0.00132562586926287	0.000673678720445063	0.000239047287899861	0.00104311543810848	0.00189064673157163	0.00202103616133519	0.000478094575799722	0.000521557719054242	0.00143428372739917	0.000565020862308762	0.00102138386648122	0.000325973574408901	0.0001086578581363	0.000152121001390821	0.000456363004172462	0.000608484005563282	0.000586752433936022	0.00115177329624478	0.000717141863699583	0.000239047287899861	0.000195584144645341	0.000130389429763561	0.000456363004172462	0.000260778859527121	0.0001086578581363	0.000152121001390821	0.000304242002781641	0.000282510431154381	0.000304242002781641	0.000369436717663421	k__Fungi;p__Basidiomycota;c__Agaricomycetes;o__unidentified;f__unidentified;g__unidentified
OTU_373	0	0.000130389429763561	8.69262865090403e-05	8.69262865090403e-05	0.000130389429763561	0.000130389429763561	6.51947148817803e-05	0	8.69262865090403e-05	0.000804068150208623	0.000152121001390821	0.000130389429763561	0.0001086578581363	0.000173852573018081	0.000369436717663421	0.000217315716272601	0.000239047287899861	0	4.34631432545202e-05	0	0.000282510431154381	0.000434631432545202	0.000630215577190542	0.00115177329624478	0.00184718358831711	0.000391168289290681	0.000325973574408901	2.17315716272601e-05	0.000130389429763561	6.51947148817803e-05	0.000173852573018081	8.69262865090403e-05	0.000195584144645341	6.51947148817803e-05	0.000869262865090403	0	k__Fungi;p__Basidiomycota;c__Agaricomycetes;o__Trechisporales;f__Hydnodontaceae;g__Trechispora;s__Trechispora_alnicola
OTU_374	0.000478094575799722	0.000717141863699583	0.000456363004172462	0.000630215577190542	0.000651947148817803	0.000673678720445063	0.000434631432545202	0.0001086578581363	0.000304242002781641	0.00143428372739917	0	8.69262865090403e-05	0	0	0	0	0	0	0	0	0.000738873435326843	0	2.17315716272601e-05	0	0	0	2.17315716272601e-05	0	0	0	0	0	0	0	0	2.17315716272601e-05	k__Fungi;p__Basidiomycota;c__Agaricomycetes
OTU_375	0.0001086578581363	6.51947148817803e-05	8.69262865090403e-05	4.34631432545202e-05	0.000217315716272601	0	6.51947148817803e-05	0	8.69262865090403e-05	6.51947148817803e-05	0	4.34631432545202e-05	0.000239047287899861	0	4.34631432545202e-05	8.69262865090403e-05	0.000173852573018081	4.34631432545202e-05	0	0.000195584144645341	0	4.34631432545202e-05	0	6.51947148817803e-05	4.34631432545202e-05	0.000152121001390821	6.51947148817803e-05	0	0.0001086578581363	0	0	6.51947148817803e-05	0	4.34631432545202e-05	0.000260778859527121	0	k__Chloroplastida;p__Phragmoplastophyta;c__unidentified;o__Zygnematales;f__unidentified;g__Cosmarium
OTU_376	0.000239047287899861	0.000195584144645341	8.69262865090403e-05	6.51947148817803e-05	0.000521557719054242	0.0001086578581363	0.000499826147426982	2.17315716272601e-05	2.17315716272601e-05	2.17315716272601e-05	0.000239047287899861	0.000130389429763561	0.000391168289290681	0.0001086578581363	0.0001086578581363	0.000217315716272601	0.000782336578581363	6.51947148817803e-05	6.51947148817803e-05	4.34631432545202e-05	4.34631432545202e-05	8.69262865090403e-05	0.000195584144645341	0.000195584144645341	0.0001086578581363	4.34631432545202e-05	2.17315716272601e-05	0.000152121001390821	6.51947148817803e-05	4.34631432545202e-05	2.17315716272601e-05	0	0.000173852573018081	8.69262865090403e-05	0.000347705146036161	2.17315716272601e-05	k__Alveolata;p__Apicomplexa
OTU_377	0.000130389429763561	0.000152121001390821	6.51947148817803e-05	8.69262865090403e-05	0.000152121001390821	0.000195584144645341	8.69262865090403e-05	0.000434631432545202	0.000543289290681502	0	0	0	0	4.34631432545202e-05	0	6.51947148817803e-05	0	0	0.000217315716272601	8.69262865090403e-05	0	0	0	4.34631432545202e-05	4.34631432545202e-05	0	4.34631432545202e-05	0	0	4.34631432545202e-05	0	2.17315716272601e-05	2.17315716272601e-05	0	0	0.000369436717663421	k__Fungi;p__Basidiomycota;c__Agaricostilbomycetes;o__Agaricostilbales;f__Agaricostilbaceae;g__Bensingtonia;s__Bensingtonia_naganoensis
OTU_378	0.0001086578581363	2.17315716272601e-05	6.51947148817803e-05	6.51947148817803e-05	0.0001086578581363	0.000173852573018081	0.000673678720445063	0.00121696801112656	0.000782336578581363	0.00275990959666203	0.000369436717663421	0.000173852573018081	0.000130389429763561	4.34631432545202e-05	4.34631432545202e-05	0.0001086578581363	4.34631432545202e-05	4.34631432545202e-05	0	2.17315716272601e-05	2.17315716272601e-05	8.69262865090403e-05	0.000173852573018081	0.000565020862308762	6.51947148817803e-05	0.000130389429763561	0	2.17315716272601e-05	8.69262865090403e-05	0	0	0	0	0.000130389429763561	0.000152121001390821	0	k__Rhizaria;p__Cercozoa;c__unidentified;o__unidentified;f__Cercomonadidae;g__Cercomonas;s__Cercomonas_plasmodialis
OTU_379	0	0.000325973574408901	0	0	0	2.17315716272601e-05	2.17315716272601e-05	0	0	2.17315716272601e-05	0	0	0	0.000260778859527121	0	0	0	0	0	0	0.0001086578581363	0.000173852573018081	0.000282510431154381	6.51947148817803e-05	0.000934457579972184	0.000304242002781641	6.51947148817803e-05	0	0	0.000304242002781641	0	0	0	0	4.34631432545202e-05	0	k__Fungi;p__Ascomycota;c__Lecanoromycetes;o__unidentified;f__unidentified;g__unidentified
OTU_380	0.000391168289290681	0.000130389429763561	0.000456363004172462	0.000239047287899861	0.000282510431154381	6.51947148817803e-05	8.69262865090403e-05	2.17315716272601e-05	4.34631432545202e-05	2.17315716272601e-05	0.00265125173852573	0	0.000152121001390821	0	0.000152121001390821	0.000239047287899861	8.69262865090403e-05	2.17315716272601e-05	6.51947148817803e-05	0	0	0.000217315716272601	0	2.17315716272601e-05	0	0.000130389429763561	0.000130389429763561	0	0.000347705146036161	4.34631432545202e-05	0.000173852573018081	2.17315716272601e-05	4.34631432545202e-05	6.51947148817803e-05	0	2.17315716272601e-05	k__Chloroplastida;p__Chlorophyta;c__Chlorophyceae;o__unidentified;f__unidentified;g__unidentified;s__Chlamydomonadaceae_sp._Pic8/18P-7d
OTU_381	2.17315716272601e-05	0	2.17315716272601e-05	2.17315716272601e-05	4.34631432545202e-05	4.34631432545202e-05	0	0.000956189151599444	0	4.34631432545202e-05	2.17315716272601e-05	0	0	6.51947148817803e-05	0	0	0	0	0	0	8.69262865090403e-05	0.000304242002781641	0.0001086578581363	4.34631432545202e-05	2.17315716272601e-05	6.51947148817803e-05	0.0001086578581363	0	0	2.17315716272601e-05	0	0	0	0	0	0	k__Fungi;p__Ascomycota
OTU_382	4.34631432545202e-05	4.34631432545202e-05	4.34631432545202e-05	8.69262865090403e-05	8.69262865090403e-05	4.34631432545202e-05	2.17315716272601e-05	0	0	0	2.17315716272601e-05	4.34631432545202e-05	4.34631432545202e-05	2.17315716272601e-05	6.51947148817803e-05	4.34631432545202e-05	0	6.51947148817803e-05	4.34631432545202e-05	6.51947148817803e-05	2.17315716272601e-05	0.000152121001390821	0.000325973574408901	4.34631432545202e-05	0.000130389429763561	0.000195584144645341	8.69262865090403e-05	6.51947148817803e-05	0.000130389429763561	0	4.34631432545202e-05	6.51947148817803e-05	2.17315716272601e-05	4.34631432545202e-05	0	0	k__Fungi;p__Ascomycota
OTU_383	0.000282510431154381	0.000282510431154381	0.0001086578581363	0.000369436717663421	0.000260778859527121	0.000521557719054242	0.000152121001390821	8.69262865090403e-05	0.000130389429763561	0.000499826147426982	0	0	0	0	0	0	0	0	0	0	0.000543289290681502	0	4.34631432545202e-05	0	2.17315716272601e-05	0	0	0	0	0	0	0	0	0	0	0	k__Fungi;p__Basidiomycota;c__Agaricomycetes
OTU_384	0.000130389429763561	2.17315716272601e-05	0.0001086578581363	8.69262865090403e-05	6.51947148817803e-05	4.34631432545202e-05	6.51947148817803e-05	2.17315716272601e-05	4.34631432545202e-05	0.000282510431154381	8.69262865090403e-05	0	4.34631432545202e-05	4.34631432545202e-05	4.34631432545202e-05	0.0001086578581363	4.34631432545202e-05	6.51947148817803e-05	0	8.69262865090403e-05	0.000239047287899861	0	0	2.17315716272601e-05	0	0	6.51947148817803e-05	4.34631432545202e-05	6.51947148817803e-05	0.0001086578581363	6.51947148817803e-05	6.51947148817803e-05	8.69262865090403e-05	0.000130389429763561	4.34631432545202e-05	0	k__Fungi;p__Basidiomycota;c__Tremellomycetidae;o__Filobasidiales;f__Filobasidiaceae;g__unidentified;s__uncultured_Tremellaceae
OTU_385	4.34631432545202e-05	0	0	0.000130389429763561	0	0	0	0	0	0	0	2.17315716272601e-05	8.69262865090403e-05	2.17315716272601e-05	0	0.000347705146036161	0	0	8.69262865090403e-05	0	4.34631432545202e-05	0.0001086578581363	2.17315716272601e-05	0	2.17315716272601e-05	4.34631432545202e-05	0.00234700973574409	0	0	0	4.34631432545202e-05	2.17315716272601e-05	0	0	0	0	k__Fungi;p__Ascomycota;c__Laboulbeniomycetes;o__Pyxidiophorales;f__Pyxidiophoraceae;g__Pyxidiophora;s__Pyxidiophora_arvernensis
OTU_386	0.000434631432545202	0.000412899860917942	6.51947148817803e-05	0.0001086578581363	4.34631432545202e-05	0.000282510431154381	0.000260778859527121	4.34631432545202e-05	0.0001086578581363	0.0001086578581363	0.00232527816411683	8.69262865090403e-05	6.51947148817803e-05	0.0001086578581363	4.34631432545202e-05	0.000195584144645341	0	4.34631432545202e-05	0	2.17315716272601e-05	0	0.0001086578581363	4.34631432545202e-05	0	0	0	0	2.17315716272601e-05	0	0.000738873435326843	0	0	4.34631432545202e-05	0	0	0	k__Eukaryota;p__LKM15;c__unidentified;o__unidentified;f__unidentified;g__unidentified;s__uncultured_eukaryote
OTU_387	0	4.34631432545202e-05	0	0	6.51947148817803e-05	0	0.000934457579972184	0	0	0	0	0.000195584144645341	0.000347705146036161	2.17315716272601e-05	0	4.34631432545202e-05	0.000325973574408901	2.17315716272601e-05	0	4.34631432545202e-05	6.51947148817803e-05	0.000130389429763561	8.69262865090403e-05	2.17315716272601e-05	0.000152121001390821	2.17315716272601e-05	2.17315716272601e-05	0	0	0	4.34631432545202e-05	2.17315716272601e-05	2.17315716272601e-05	0	0.000195584144645341	0	k__Chloroplastida;p__Chlorophyta;c__Ulvophyceae;o__unidentified;f__unidentified;g__Printzina;s__Printzina_bosseae
OTU_388	0.0001086578581363	0	2.17315716272601e-05	0	0	4.34631432545202e-05	0	4.34631432545202e-05	2.17315716272601e-05	0.000956189151599444	0.000260778859527121	0	0.000130389429763561	0	4.34631432545202e-05	0.0001086578581363	6.51947148817803e-05	2.17315716272601e-05	0	4.34631432545202e-05	6.51947148817803e-05	4.34631432545202e-05	0	0	4.34631432545202e-05	2.17315716272601e-05	2.17315716272601e-05	2.17315716272601e-05	4.34631432545202e-05	8.69262865090403e-05	0.000195584144645341	0	2.17315716272601e-05	4.34631432545202e-05	0	0	k__Fungi;p__Ascomycota;c__Dothideomycetes;o__Pleosporales;f__Mytilinidiaceae
OTU_389	6.51947148817803e-05	0	0.000195584144645341	0	4.34631432545202e-05	2.17315716272601e-05	0.000195584144645341	4.34631432545202e-05	0	0	0.0001086578581363	0.000130389429763561	0.000130389429763561	0.0001086578581363	0.000195584144645341	0.0001086578581363	2.17315716272601e-05	0	6.51947148817803e-05	4.34631432545202e-05	0.000456363004172462	0.00121696801112656	0.00110831015299026	0.000565020862308762	0.000804068150208623	0.000956189151599444	0.000260778859527121	0.0001086578581363	8.69262865090403e-05	0.000130389429763561	0.0001086578581363	6.51947148817803e-05	0	0	4.34631432545202e-05	0	k__Alveolata;p__Apicomplexa;c__Gregarinasina;o__Eugregarinorida;f__unidentified;g__Gregarina
OTU_390	0	6.51947148817803e-05	0.000152121001390821	8.69262865090403e-05	0.000325973574408901	0.000152121001390821	0.000152121001390821	0	0	2.17315716272601e-05	6.51947148817803e-05	2.17315716272601e-05	0.000239047287899861	2.17315716272601e-05	0.0001086578581363	0	0.000391168289290681	6.51947148817803e-05	2.17315716272601e-05	4.34631432545202e-05	0.000173852573018081	0.000152121001390821	0.000239047287899861	0.000651947148817803	0.000717141863699583	0.000456363004172462	0.000173852573018081	0	0.000130389429763561	6.51947148817803e-05	6.51947148817803e-05	4.34631432545202e-05	0.000608484005563282	0	0.000195584144645341	0.000651947148817803	k__Fungi;p__Ascomycota;c__Sordariomycetes
OTU_391	0	0	0	6.51947148817803e-05	0	0	6.51947148817803e-05	2.17315716272601e-05	0	0	6.51947148817803e-05	0.000130389429763561	2.17315716272601e-05	0	0	0	0	0	0	0	0	6.51947148817803e-05	6.51947148817803e-05	0	0.000282510431154381	4.34631432545202e-05	0	0	6.51947148817803e-05	2.17315716272601e-05	8.69262865090403e-05	0	0	0	0	0.00249913073713491	k__Rhizaria;p__Cercozoa;c__PP1-8;o__unidentified;f__unidentified;g__unidentified
OTU_392	0.000152121001390821	8.69262865090403e-05	0.000130389429763561	4.34631432545202e-05	8.69262865090403e-05	2.17315716272601e-05	4.34631432545202e-05	2.17315716272601e-05	2.17315716272601e-05	0	6.51947148817803e-05	4.34631432545202e-05	0.000152121001390821	0.000195584144645341	0.000152121001390821	0	8.69262865090403e-05	2.17315716272601e-05	6.51947148817803e-05	0	8.69262865090403e-05	0.000434631432545202	0.000347705146036161	0.000260778859527121	0.000456363004172462	0.000304242002781641	0.000152121001390821	0	8.69262865090403e-05	0	6.51947148817803e-05	2.17315716272601e-05	8.69262865090403e-05	0	0	0	k__Fungi;p__Ascomycota
OTU_393	0.000130389429763561	8.69262865090403e-05	0	0	0.000130389429763561	2.17315716272601e-05	2.17315716272601e-05	0	0	4.34631432545202e-05	0.000239047287899861	6.51947148817803e-05	0.000130389429763561	0	2.17315716272601e-05	4.34631432545202e-05	0.000260778859527121	0	6.51947148817803e-05	6.51947148817803e-05	0.0001086578581363	0.000217315716272601	2.17315716272601e-05	4.34631432545202e-05	6.51947148817803e-05	0.000152121001390821	4.34631432545202e-05	0	2.17315716272601e-05	4.34631432545202e-05	4.34631432545202e-05	8.69262865090403e-05	0.000152121001390821	6.51947148817803e-05	6.51947148817803e-05	0	k__Fungi;p__unidentified;c__unidentified;o__Blastocladiales;f__unidentified;g__unidentified;s__uncultured_fungus
OTU_394	2.17315716272601e-05	6.51947148817803e-05	2.17315716272601e-05	0	0	0	2.17315716272601e-05	0	0	0	6.51947148817803e-05	2.17315716272601e-05	0.000173852573018081	2.17315716272601e-05	0.0001086578581363	0.0001086578581363	4.34631432545202e-05	0	0	0	0	0	4.34631432545202e-05	8.69262865090403e-05	0.000391168289290681	6.51947148817803e-05	2.17315716272601e-05	2.17315716272601e-05	8.69262865090403e-05	0	6.51947148817803e-05	2.17315716272601e-05	2.17315716272601e-05	2.17315716272601e-05	0	0.00195584144645341	k__Chloroplastida;p__Streptophyta;c__Embryophyta;o__Jungermanniales;f__unidentified;g__Lejeunea;s__Lejeunea_cavifolia
OTU_395	4.34631432545202e-05	0	0	0	0	0	0	0	0	0	2.17315716272601e-05	0	4.34631432545202e-05	0	4.34631432545202e-05	0	4.34631432545202e-05	0	0	0	0	0	0.000347705146036161	0.00184718358831711	2.17315716272601e-05	6.51947148817803e-05	0	0	0	0	0	0	0	0	0	0	k__Fungi;p__Basidiomycota;c__Agaricomycetes
OTU_396	0.0001086578581363	6.51947148817803e-05	0	6.51947148817803e-05	6.51947148817803e-05	2.17315716272601e-05	6.51947148817803e-05	6.51947148817803e-05	4.34631432545202e-05	2.17315716272601e-05	0.000130389429763561	0	2.17315716272601e-05	0	0	0	0	0	0	0	2.17315716272601e-05	0.000152121001390821	0	0.00221662030598053	8.69262865090403e-05	0	0	0	0	0	0	0	0	0	0	0	k__Stramenopiles;p__unidentified;c__A1;o__unidentified;f__unidentified;g__unidentified;s__uncultured_eukaryotic_picoplankton
OTU_397	2.17315716272601e-05	0	0	6.51947148817803e-05	4.34631432545202e-05	6.51947148817803e-05	4.34631432545202e-05	0.000347705146036161	4.34631432545202e-05	0	2.17315716272601e-05	2.17315716272601e-05	8.69262865090403e-05	8.69262865090403e-05	4.34631432545202e-05	0.000543289290681502	6.51947148817803e-05	2.17315716272601e-05	0.000369436717663421	0.0001086578581363	8.69262865090403e-05	4.34631432545202e-05	0	4.34631432545202e-05	0	0	0.000130389429763561	4.34631432545202e-05	0.000173852573018081	2.17315716272601e-05	0.0001086578581363	0.0001086578581363	6.51947148817803e-05	0	0.000282510431154381	4.34631432545202e-05	k__Fungi;p__Ascomycota;c__Dothideomycetes;o__Capnodiales;f__Mycosphaerellaceae
OTU_398	6.51947148817803e-05	0	0	0	0	4.34631432545202e-05	0	0.0001086578581363	0	0	0	0	0.000282510431154381	4.34631432545202e-05	2.17315716272601e-05	0	0	0	6.51947148817803e-05	0	6.51947148817803e-05	6.51947148817803e-05	4.34631432545202e-05	0.000217315716272601	0.000173852573018081	0.0001086578581363	0.000239047287899861	0	0.000325973574408901	0	0	0	0	2.17315716272601e-05	0	8.69262865090403e-05	k__Fungi;p__Basidiomycota;c__Agaricomycetes;o__Corticiales;f__Corticiaceae;g__Hyphodontia
OTU_400	0	0	0	0	0	0	0	0	0	0	0	0.0001086578581363	6.51947148817803e-05	8.69262865090403e-05	0	0	0	2.17315716272601e-05	0	0	0.0001086578581363	8.69262865090403e-05	0.00265125173852573	6.51947148817803e-05	2.17315716272601e-05	0.0001086578581363	4.34631432545202e-05	8.69262865090403e-05	0	0	0	0	0	0	0	0	k__Chloroplastida;p__Chlorophyta;c__Chlorophyceae;o__unidentified;f__unidentified;g__Hydrodictyon;s__Hydrodictyon_reticulatum
OTU_401	0.000695410292072323	0.000260778859527121	0.000499826147426982	0.000651947148817803	0.000239047287899861	0.000369436717663421	6.51947148817803e-05	0	0.0001086578581363	0	4.34631432545202e-05	0.0001086578581363	0.000630215577190542	0.000217315716272601	0.000130389429763561	0.000173852573018081	0.000130389429763561	6.51947148817803e-05	2.17315716272601e-05	2.17315716272601e-05	0	2.17315716272601e-05	0.0001086578581363	0.000173852573018081	0.000369436717663421	0.000173852573018081	0.000239047287899861	0	0.000412899860917942	6.51947148817803e-05	6.51947148817803e-05	8.69262865090403e-05	0.000239047287899861	0.0001086578581363	0.000499826147426982	2.17315716272601e-05	k__Chloroplastida;p__unidentified;c__unidentified;o__Amb-18S-504;f__unidentified;g__unidentified;s__Phaseoleae_environmental_sample
OTU_402	8.69262865090403e-05	8.69262865090403e-05	2.17315716272601e-05	6.51947148817803e-05	6.51947148817803e-05	8.69262865090403e-05	0.00306415159944367	0	6.51947148817803e-05	0	0	2.17315716272601e-05	2.17315716272601e-05	2.17315716272601e-05	0	6.51947148817803e-05	2.17315716272601e-05	0	0	0	0	0	0	0	0.000195584144645341	0	0	0	4.34631432545202e-05	0	0	4.34631432545202e-05	2.17315716272601e-05	0	0	2.17315716272601e-05	k__Eukaryota;p__LKM11;c__unidentified;o__unidentified;f__unidentified;g__unidentified;s__uncultured_fungus
OTU_403	0	0	4.34631432545202e-05	2.17315716272601e-05	0	0	0	6.51947148817803e-05	0	0	0	0	0	2.17315716272601e-05	4.34631432545202e-05	0	4.34631432545202e-05	0	4.34631432545202e-05	6.51947148817803e-05	0	6.51947148817803e-05	0.0001086578581363	0.000412899860917942	0.000130389429763561	0.000173852573018081	2.17315716272601e-05	0	2.17315716272601e-05	0	2.17315716272601e-05	0	4.34631432545202e-05	4.34631432545202e-05	0	6.51947148817803e-05	k__Fungi;p__Basidiomycota;c__Agaricomycetes;o__Corticiales;f__Corticiaceae;g__Sistotrema
OTU_404	0.000195584144645341	0	2.17315716272601e-05	0	4.34631432545202e-05	4.34631432545202e-05	2.17315716272601e-05	0	2.17315716272601e-05	4.34631432545202e-05	2.17315716272601e-05	0.000260778859527121	0.000152121001390821	0.000434631432545202	0.000369436717663421	2.17315716272601e-05	2.17315716272601e-05	0	2.17315716272601e-05	0.0001086578581363	0.000130389429763561	0.000217315716272601	0.000304242002781641	0.000195584144645341	0.000217315716272601	2.17315716272601e-05	0	0	0.000217315716272601	2.17315716272601e-05	2.17315716272601e-05	0	0	0	0.000130389429763561	0.000173852573018081	k__Rhizaria;p__Cercozoa;c__Imbricatea;o__Euglyphida;f__Euglyphidae;g__Euglypha;s__Euglypha_rotunda
OTU_405	0	0	0	0	6.51947148817803e-05	2.17315716272601e-05	0	0	0	0.001086578581363	0	2.17315716272601e-05	4.34631432545202e-05	4.34631432545202e-05	0.000608484005563282	4.34631432545202e-05	0.000260778859527121	0	2.17315716272601e-05	0	2.17315716272601e-05	0	0	4.34631432545202e-05	8.69262865090403e-05	8.69262865090403e-05	4.34631432545202e-05	0	0	8.69262865090403e-05	2.17315716272601e-05	4.34631432545202e-05	4.34631432545202e-05	6.51947148817803e-05	2.17315716272601e-05	0	k__Fungi;p__Ascomycota;c__Dothideomycetes;o__Capnodiales;f__Mycosphaerellaceae;g__unidentified
OTU_406	0	0	0	0	0	6.51947148817803e-05	0	0	0	2.17315716272601e-05	0.00202103616133519	2.17315716272601e-05	0	0	6.51947148817803e-05	0	8.69262865090403e-05	6.51947148817803e-05	0	0	0	4.34631432545202e-05	0	0	0	0	0	6.51947148817803e-05	0	0	0	2.17315716272601e-05	0	0	0	0	k__Chloroplastida;p__Chlorophyta;c__Chlorophyceae;o__unidentified;f__unidentified
OTU_407	0.0001086578581363	0	2.17315716272601e-05	6.51947148817803e-05	6.51947148817803e-05	8.69262865090403e-05	0.0011952364394993	0.000304242002781641	0	0.000325973574408901	2.17315716272601e-05	0.000347705146036161	8.69262865090403e-05	0.000260778859527121	4.34631432545202e-05	0.000369436717663421	0.000173852573018081	6.51947148817803e-05	6.51947148817803e-05	8.69262865090403e-05	8.69262865090403e-05	0.000130389429763561	8.69262865090403e-05	4.34631432545202e-05	6.51947148817803e-05	2.17315716272601e-05	4.34631432545202e-05	0	2.17315716272601e-05	4.34631432545202e-05	4.34631432545202e-05	2.17315716272601e-05	6.51947148817803e-05	2.17315716272601e-05	2.17315716272601e-05	2.17315716272601e-05	k__Fungi;p__Basidiomycota;c__Agaricomycetes
OTU_409	4.34631432545202e-05	2.17315716272601e-05	2.17315716272601e-05	0	6.51947148817803e-05	0.0001086578581363	4.34631432545202e-05	0.000152121001390821	0.00282510431154381	0	6.51947148817803e-05	0	2.17315716272601e-05	0	0	0	0	0	2.17315716272601e-05	0.0001086578581363	0	6.51947148817803e-05	2.17315716272601e-05	4.34631432545202e-05	0.000391168289290681	0	4.34631432545202e-05	0.000130389429763561	0	0	0	0	2.17315716272601e-05	2.17315716272601e-05	0	0	k__Eukaryota;p__LKM11;c__unidentified;o__unidentified;f__unidentified;g__unidentified;s__uncultured_marine_picoeukaryote
OTU_410	0	0	2.17315716272601e-05	0	0	0	6.51947148817803e-05	0	0	2.17315716272601e-05	4.34631432545202e-05	0.000152121001390821	2.17315716272601e-05	0	2.17315716272601e-05	0	0	0	0	0	6.51947148817803e-05	2.17315716272601e-05	0.000130389429763561	2.17315716272601e-05	2.17315716272601e-05	2.17315716272601e-05	2.17315716272601e-05	0.00130389429763561	8.69262865090403e-05	2.17315716272601e-05	0.000173852573018081	0.0001086578581363	0	6.51947148817803e-05	0.000391168289290681	6.51947148817803e-05	k__Alveolata;p__Apicomplexa;c__Gregarinasina;o__Eugregarinorida;f__unidentified;g__Leidyana;s__Leidyana_erratica
OTU_411	0.000412899860917942	6.51947148817803e-05	0.0001086578581363	0.000173852573018081	0.000890994436717663	0.000130389429763561	0	4.34631432545202e-05	0	0	0	4.34631432545202e-05	0.000130389429763561	0.000282510431154381	0	0.000608484005563282	0.000173852573018081	0	0	4.34631432545202e-05	0	0	2.17315716272601e-05	6.51947148817803e-05	6.51947148817803e-05	0	0.0001086578581363	0	8.69262865090403e-05	4.34631432545202e-05	2.17315716272601e-05	6.51947148817803e-05	0.000608484005563282	0	0	0.000369436717663421	k__Fungi;p__Basidiomycota;c__unidentified;o__Sporidiobolales;f__unidentified;g__Rhodotorula
OTU_412	0	0	0	2.17315716272601e-05	0	2.17315716272601e-05	0.000173852573018081	0	0	0	0	0	6.51947148817803e-05	2.17315716272601e-05	2.17315716272601e-05	0.000499826147426982	8.69262865090403e-05	0	2.17315716272601e-05	0	2.17315716272601e-05	0	0	0.00128216272600834	0	4.34631432545202e-05	2.17315716272601e-05	0	0	0	4.34631432545202e-05	2.17315716272601e-05	0	0	0	0	k__Animalia;p__Annelida;c__unidentified;o__unidentified;f__Enchytraeidae;g__unidentified;s__Dichogaster_saliens
OTU_413	4.34631432545202e-05	2.17315716272601e-05	2.17315716272601e-05	0	4.34631432545202e-05	0	0	0.000217315716272601	0	2.17315716272601e-05	0	0	2.17315716272601e-05	8.69262865090403e-05	0	0	6.51947148817803e-05	6.51947148817803e-05	0	4.34631432545202e-05	2.17315716272601e-05	0.000173852573018081	0.000239047287899861	0.0001086578581363	0.000217315716272601	6.51947148817803e-05	6.51947148817803e-05	0	0	2.17315716272601e-05	0	0	4.34631432545202e-05	2.17315716272601e-05	0	0	k__Fungi;p__Basidiomycota;c__Exobasidiomycetidae;o__Exobasidiales;f__Brachybasidiaceae;g__Dicellomyces
OTU_414	6.51947148817803e-05	0.000152121001390821	6.51947148817803e-05	0.000173852573018081	0.0001086578581363	0.000217315716272601	0.00273817802503477	0.000977920723226704	6.51947148817803e-05	0	0.0001086578581363	0.000369436717663421	4.34631432545202e-05	4.34631432545202e-05	8.69262865090403e-05	0.000130389429763561	6.51947148817803e-05	6.51947148817803e-05	2.17315716272601e-05	8.69262865090403e-05	8.69262865090403e-05	0.0001086578581363	0.000325973574408901	8.69262865090403e-05	0.000412899860917942	8.69262865090403e-05	0.000130389429763561	0	6.51947148817803e-05	4.34631432545202e-05	0	0.000152121001390821	2.17315716272601e-05	8.69262865090403e-05	6.51947148817803e-05	8.69262865090403e-05	k__Fungi;p__Basidiomycota;c__Agaricomycetes;o__unidentified;f__unidentified
OTU_415	0	0	0	0	0	0	0	0	0	0.000651947148817803	0.000217315716272601	0	0	0	0	0	0	0	0	0	0.000325973574408901	0	0	0	0	0	0	0.000152121001390821	0.000217315716272601	0.000130389429763561	0.0001086578581363	0.000152121001390821	0.000173852573018081	4.34631432545202e-05	6.51947148817803e-05	2.17315716272601e-05	k__Fungi;p__Chytridiomycota;c__Chytridiomycetes;o__Chytridiales;f__unidentified;g__Blyttiomyces;s__uncultured_soil_fungus
OTU_416	0.000130389429763561	0.000630215577190542	6.51947148817803e-05	0.000260778859527121	0.000130389429763561	8.69262865090403e-05	8.69262865090403e-05	4.34631432545202e-05	0.000173852573018081	0.0001086578581363	0.000173852573018081	0.000195584144645341	0.000152121001390821	0.000282510431154381	4.34631432545202e-05	0.000173852573018081	4.34631432545202e-05	0	2.17315716272601e-05	4.34631432545202e-05	0.000282510431154381	0.000695410292072323	0.000499826147426982	2.17315716272601e-05	0.000195584144645341	2.17315716272601e-05	0.000130389429763561	4.34631432545202e-05	2.17315716272601e-05	2.17315716272601e-05	0	2.17315716272601e-05	2.17315716272601e-05	0	2.17315716272601e-05	0	k__Stramenopiles;p__Peronosporomycetes;c__unidentified;o__unidentified;f__unidentified;g__Pythium;s__Pythiaceae_sp._PHY2
OTU_417	8.69262865090403e-05	0.000152121001390821	2.17315716272601e-05	2.17315716272601e-05	0	0	0.0001086578581363	0	0	0	0	0.000152121001390821	0	0	0	0	0	0	0	0	2.17315716272601e-05	0.000152121001390821	0.000673678720445063	0.000130389429763561	0.000847531293463143	4.34631432545202e-05	0.000130389429763561	0	0.000173852573018081	0	0	0.000152121001390821	0	4.34631432545202e-05	8.69262865090403e-05	0.0001086578581363	k__Animalia;p__Arthropoda;c__Maxillopoda;o__unidentified;f__unidentified;g__unidentified;s__Attheyella_crassa
OTU_418	0	2.17315716272601e-05	8.69262865090403e-05	0	6.51947148817803e-05	0.000651947148817803	0	0	8.69262865090403e-05	6.51947148817803e-05	0	0.000152121001390821	0.000217315716272601	0.000260778859527121	0.000130389429763561	0.000152121001390821	0.000130389429763561	0.000804068150208623	6.51947148817803e-05	0.000260778859527121	0.0001086578581363	4.34631432545202e-05	8.69262865090403e-05	0	0.0001086578581363	0.000130389429763561	4.34631432545202e-05	0	0	2.17315716272601e-05	2.17315716272601e-05	0	0	0.000304242002781641	0	0	k__Animalia;p__Arthropoda;c__unidentified;o__Collembola;f__unidentified;g__unidentified
OTU_419	0	0	4.34631432545202e-05	0	6.51947148817803e-05	0	0	0	6.51947148817803e-05	2.17315716272601e-05	0.000152121001390821	8.69262865090403e-05	2.17315716272601e-05	4.34631432545202e-05	0.000282510431154381	4.34631432545202e-05	0.0001086578581363	0	0.0001086578581363	8.69262865090403e-05	0	0.000152121001390821	6.51947148817803e-05	6.51947148817803e-05	0.000130389429763561	8.69262865090403e-05	0	0	0.000152121001390821	4.34631432545202e-05	8.69262865090403e-05	6.51947148817803e-05	4.34631432545202e-05	0	0	2.17315716272601e-05	k__Fungi;p__Ascomycota
OTU_420	4.34631432545202e-05	4.34631432545202e-05	0	0.000195584144645341	2.17315716272601e-05	0	0.000173852573018081	2.17315716272601e-05	0	4.34631432545202e-05	4.34631432545202e-05	4.34631432545202e-05	0.000130389429763561	0.000173852573018081	0.00134735744089013	0.000456363004172462	0.000152121001390821	0.000130389429763561	2.17315716272601e-05	6.51947148817803e-05	8.69262865090403e-05	4.34631432545202e-05	4.34631432545202e-05	0.000260778859527121	2.17315716272601e-05	6.51947148817803e-05	0.000195584144645341	6.51947148817803e-05	8.69262865090403e-05	2.17315716272601e-05	6.51947148817803e-05	0.000173852573018081	0	8.69262865090403e-05	0.00219488873435327	8.69262865090403e-05	k__Fungi;p__Basidiomycota;c__Agaricomycetes;o__Corticiales;f__Corticiaceae;g__Phlebia;s__Phlebia_radiata
OTU_421	0	0	4.34631432545202e-05	4.34631432545202e-05	2.17315716272601e-05	0	4.34631432545202e-05	0	0	0	0.000304242002781641	0.0001086578581363	2.17315716272601e-05	4.34631432545202e-05	4.34631432545202e-05	0.000130389429763561	0.000130389429763561	2.17315716272601e-05	0	4.34631432545202e-05	8.69262865090403e-05	0.0001086578581363	0.000130389429763561	4.34631432545202e-05	0.000173852573018081	6.51947148817803e-05	2.17315716272601e-05	2.17315716272601e-05	0	0	6.51947148817803e-05	0	2.17315716272601e-05	0	0.000586752433936022	0	k__Fungi;p__Ascomycota;c__Dothideomycetes;o__Pleosporales
OTU_422	0	0	2.17315716272601e-05	0	6.51947148817803e-05	0	0	0	0	0.000934457579972184	0	8.69262865090403e-05	0	6.51947148817803e-05	2.17315716272601e-05	2.17315716272601e-05	4.34631432545202e-05	0	0	0	4.34631432545202e-05	4.34631432545202e-05	0	0.000738873435326843	0	0.000195584144645341	6.51947148817803e-05	0	6.51947148817803e-05	2.17315716272601e-05	4.34631432545202e-05	0.0001086578581363	0.000152121001390821	0	0	0	k__Fungi;p__Basidiomycota;c__Tremellomycetidae;o__Tremellales;f__unidentified
OTU_423	0.0001086578581363	8.69262865090403e-05	0.000217315716272601	0.0001086578581363	0.000130389429763561	0.000130389429763561	0.000304242002781641	0	0	0	0.000130389429763561	6.51947148817803e-05	0.000195584144645341	0.000195584144645341	0.000195584144645341	0.000130389429763561	8.69262865090403e-05	6.51947148817803e-05	4.34631432545202e-05	4.34631432545202e-05	8.69262865090403e-05	6.51947148817803e-05	6.51947148817803e-05	6.51947148817803e-05	6.51947148817803e-05	0.000195584144645341	0.000130389429763561	0	4.34631432545202e-05	0.0001086578581363	4.34631432545202e-05	0.0001086578581363	4.34631432545202e-05	0	0	0	k__Chloroplastida;p__Chlorophyta;c__Trebouxiophyceae;o__unidentified;f__unidentified;g__Leptosira;s__Leptosira_obovata
OTU_424	0.000130389429763561	0	4.34631432545202e-05	2.17315716272601e-05	4.34631432545202e-05	0	8.69262865090403e-05	0	0	4.34631432545202e-05	0.000130389429763561	2.17315716272601e-05	0.000217315716272601	0	0	6.51947148817803e-05	0	4.34631432545202e-05	0	0	0.0001086578581363	0.000239047287899861	0.0001086578581363	0.000217315716272601	6.51947148817803e-05	2.17315716272601e-05	0.000173852573018081	4.34631432545202e-05	0.000173852573018081	0	6.51947148817803e-05	8.69262865090403e-05	4.34631432545202e-05	4.34631432545202e-05	0	0	k__Fungi
OTU_425	6.51947148817803e-05	2.17315716272601e-05	0	0.000152121001390821	6.51947148817803e-05	0	6.51947148817803e-05	2.17315716272601e-05	2.17315716272601e-05	4.34631432545202e-05	4.34631432545202e-05	4.34631432545202e-05	4.34631432545202e-05	2.17315716272601e-05	0	4.34631432545202e-05	0	0	2.17315716272601e-05	2.17315716272601e-05	0.000260778859527121	0.000347705146036161	0.000543289290681502	0.000282510431154381	0.000173852573018081	0.000173852573018081	0.00158640472878999	0.0001086578581363	6.51947148817803e-05	2.17315716272601e-05	6.51947148817803e-05	0.000304242002781641	0	0	0.000130389429763561	2.17315716272601e-05	k__Alveolata;p__Apicomplexa;c__Gregarinasina;o__Eugregarinorida;f__unidentified;g__Gregarina
OTU_426	8.69262865090403e-05	0	8.69262865090403e-05	2.17315716272601e-05	2.17315716272601e-05	8.69262865090403e-05	6.51947148817803e-05	0	2.17315716272601e-05	4.34631432545202e-05	8.69262865090403e-05	4.34631432545202e-05	0.000195584144645341	4.34631432545202e-05	0.000195584144645341	8.69262865090403e-05	6.51947148817803e-05	4.34631432545202e-05	4.34631432545202e-05	4.34631432545202e-05	6.51947148817803e-05	0.000173852573018081	2.17315716272601e-05	4.34631432545202e-05	0.000130389429763561	0.000239047287899861	0.000173852573018081	4.34631432545202e-05	6.51947148817803e-05	0	0.0001086578581363	6.51947148817803e-05	2.17315716272601e-05	0	0	0	k__Fungi;p__Ascomycota;c__Eurotiomycetes;o__Chaetothyriales;f__Herpotrichiellaceae
OTU_427	4.34631432545202e-05	0	0	0	0	0	0.000130389429763561	0	0	0	0	0	0	0	0	0	0	0	0	0	2.17315716272601e-05	0	0.00236874130737135	0.000130389429763561	2.17315716272601e-05	2.17315716272601e-05	4.34631432545202e-05	6.51947148817803e-05	0	0	0	0	0	0	0.000260778859527121	0	k__Fungi;p__Basidiomycota;c__Dacrymycetes;o__Dacrymycetales;f__Dacrymycetaceae;g__Calocera;s__Calocera_lutea
OTU_428	0	0	0	0	0	0	0	0	0.000152121001390821	8.69262865090403e-05	0	6.51947148817803e-05	2.17315716272601e-05	8.69262865090403e-05	0	0.000152121001390821	0.0001086578581363	2.17315716272601e-05	2.17315716272601e-05	0.000478094575799722	0.000130389429763561	4.34631432545202e-05	0	0	0	2.17315716272601e-05	2.17315716272601e-05	0	0	0	0	2.17315716272601e-05	0	0	0	0	k__Fungi;p__Ascomycota;c__Saccharomycetes;o__Saccharomycetales;f__unidentified;g__Candida;s__Candida_silvae
OTU_429	4.34631432545202e-05	6.51947148817803e-05	0.000173852573018081	4.34631432545202e-05	2.17315716272601e-05	8.69262865090403e-05	6.51947148817803e-05	4.34631432545202e-05	4.34631432545202e-05	0	0.000325973574408901	0.000760605006954103	6.51947148817803e-05	0.000260778859527121	0.0001086578581363	8.69262865090403e-05	0.000195584144645341	4.34631432545202e-05	8.69262865090403e-05	6.51947148817803e-05	0.000130389429763561	0.000173852573018081	0.000434631432545202	4.34631432545202e-05	0.000999652294853964	0.000282510431154381	0.000195584144645341	8.69262865090403e-05	8.69262865090403e-05	4.34631432545202e-05	0.000304242002781641	2.17315716272601e-05	0.0001086578581363	6.51947148817803e-05	0.000586752433936022	2.17315716272601e-05	k__Fungi;p__Ascomycota;c__Dothideomycetes;o__Capnodiales;f__Mycosphaerellaceae;g__unidentified;s__Ochroconis_constricta
OTU_430	0.000325973574408901	0.000347705146036161	0.000260778859527121	0.000173852573018081	0.000456363004172462	0.000412899860917942	8.69262865090403e-05	6.51947148817803e-05	0.001086578581363	0.000608484005563282	0.000565020862308762	0.000847531293463143	0.000586752433936022	0.000456363004172462	0.000152121001390821	0.000434631432545202	0.000391168289290681	0.000130389429763561	0.000130389429763561	0.000173852573018081	0.000130389429763561	8.69262865090403e-05	0.000717141863699583	0.00173852573018081	0.000282510431154381	0.000391168289290681	0.000260778859527121	0.000695410292072323	0.000804068150208623	4.34631432545202e-05	0.000239047287899861	0.000260778859527121	0.000543289290681502	0.000325973574408901	0.000586752433936022	0.00136908901251739	k__Chloroplastida;p__Chlorophyta;c__Trebouxiophyceae;o__unidentified;f__unidentified
OTU_431	6.51947148817803e-05	2.17315716272601e-05	4.34631432545202e-05	0	6.51947148817803e-05	6.51947148817803e-05	8.69262865090403e-05	0	0.00113004172461752	0.000412899860917942	0.000239047287899861	0.000347705146036161	6.51947148817803e-05	0.000239047287899861	0.000130389429763561	0.000152121001390821	0.000130389429763561	0.0001086578581363	0	8.69262865090403e-05	0.000456363004172462	0.000325973574408901	0.000152121001390821	0.000260778859527121	0.000217315716272601	8.69262865090403e-05	0	4.34631432545202e-05	8.69262865090403e-05	0.000130389429763561	0.0001086578581363	6.51947148817803e-05	0.000130389429763561	0.000217315716272601	0	0.000325973574408901	k__Fungi;p__Basidiomycota;c__Tremellomycetidae;o__Tremellales;f__unidentified
OTU_432	0.000239047287899861	0	0	8.69262865090403e-05	4.34631432545202e-05	0.000173852573018081	0.000325973574408901	0.000173852573018081	8.69262865090403e-05	0.000651947148817803	0.000521557719054242	6.51947148817803e-05	4.34631432545202e-05	0	0	2.17315716272601e-05	0	0.0001086578581363	0.000152121001390821	4.34631432545202e-05	0.000391168289290681	0.000869262865090403	0.000760605006954103	0.000369436717663421	0.000260778859527121	0.0001086578581363	0.000260778859527121	0.000521557719054242	0.000347705146036161	0.000130389429763561	4.34631432545202e-05	0.000260778859527121	0.0001086578581363	0.0001086578581363	8.69262865090403e-05	0.000499826147426982	k__Fungi;p__unidentified;c__unidentified;o__Mucorales;f__unidentified;g__unidentified;s__Mucor_irregularis
OTU_433	0.000673678720445063	0.000347705146036161	0.000412899860917942	0.00126043115438108	0.000391168289290681	0.000347705146036161	0.000934457579972184	2.17315716272601e-05	0.00167333101529903	0.0001086578581363	6.51947148817803e-05	0.000195584144645341	0.000260778859527121	0.000195584144645341	0.000130389429763561	0.000977920723226704	6.51947148817803e-05	8.69262865090403e-05	4.34631432545202e-05	6.51947148817803e-05	6.51947148817803e-05	2.17315716272601e-05	0.000586752433936022	0.0001086578581363	4.34631432545202e-05	0.000195584144645341	0.000651947148817803	0.000977920723226704	0.000478094575799722	4.34631432545202e-05	6.51947148817803e-05	0.000521557719054242	0.000130389429763561	8.69262865090403e-05	0	0.0001086578581363	k__Chloroplastida;p__Chlorophyta;c__Trebouxiophyceae;o__unidentified;f__unidentified
OTU_434	0	0	2.17315716272601e-05	0	0	0	2.17315716272601e-05	2.17315716272601e-05	0	0	0	0	2.17315716272601e-05	0	0	0	0	0	6.51947148817803e-05	0	0	0.000152121001390821	0.0001086578581363	4.34631432545202e-05	0.000130389429763561	6.51947148817803e-05	2.17315716272601e-05	2.17315716272601e-05	0	0	2.17315716272601e-05	0	0	0	0	0	k__Alveolata;p__Apicomplexa;c__Gregarinasina;o__Eugregarinorida;f__unidentified;g__Gregarina
OTU_435	2.17315716272601e-05	6.51947148817803e-05	0.0001086578581363	0	0	0	4.34631432545202e-05	0.000173852573018081	0	4.34631432545202e-05	2.17315716272601e-05	0	4.34631432545202e-05	0	6.51947148817803e-05	0	0	0	4.34631432545202e-05	0	0.000152121001390821	0.000195584144645341	0.000195584144645341	8.69262865090403e-05	0.000130389429763561	0.000260778859527121	0.000130389429763561	0	0	0	6.51947148817803e-05	0	0	0	0	4.34631432545202e-05	k__Alveolata;p__Ciliophora;c__Oligohymenophorea;o__Conthreep;f__unidentified;g__Tetrahymena;s__uncultured_microeukaryote
OTU_436	0.000152121001390821	2.17315716272601e-05	0	0.0001086578581363	0	0.000195584144645341	4.34631432545202e-05	6.51947148817803e-05	0	4.34631432545202e-05	0.0001086578581363	0.000130389429763561	0.000130389429763561	2.17315716272601e-05	0	8.69262865090403e-05	0	8.69262865090403e-05	4.34631432545202e-05	0	0.000630215577190542	0.00128216272600834	0.001086578581363	0.000695410292072323	0.000239047287899861	0.000347705146036161	0.000195584144645341	8.69262865090403e-05	0.000152121001390821	0	0	2.17315716272601e-05	2.17315716272601e-05	6.51947148817803e-05	4.34631432545202e-05	6.51947148817803e-05	k__Alveolata;p__Apicomplexa;c__Gregarinasina;o__Eugregarinorida;f__unidentified
OTU_437	6.51947148817803e-05	4.34631432545202e-05	6.51947148817803e-05	0.000369436717663421	6.51947148817803e-05	0.000499826147426982	0.001086578581363	6.51947148817803e-05	2.17315716272601e-05	0	0	0.000651947148817803	4.34631432545202e-05	0	0	0.000152121001390821	0	4.34631432545202e-05	0	0	0	0	0	0	0	0	0.000152121001390821	0	0	0	6.51947148817803e-05	4.34631432545202e-05	0	0	0	0	k__Chloroplastida;p__Streptophyta;c__Embryophyta;o__Coniferales;f__unidentified;g__unidentified;s__unidentified
OTU_438	4.34631432545202e-05	0	4.34631432545202e-05	8.69262865090403e-05	0.0001086578581363	0	2.17315716272601e-05	0	0	0.000260778859527121	2.17315716272601e-05	0.000195584144645341	8.69262865090403e-05	0	6.51947148817803e-05	0.000282510431154381	0.000478094575799722	2.17315716272601e-05	4.34631432545202e-05	8.69262865090403e-05	4.34631432545202e-05	0	0	0	0	0	4.34631432545202e-05	0	0	0	0	2.17315716272601e-05	4.34631432545202e-05	0	0	0	k__Chloroplastida;p__Chlorophyta;c__Chlorophyceae;o__unidentified;f__unidentified;g__Chlorococcum;s__Chlorococcum_sp._RK261
OTU_439	0	0.000130389429763561	0	0	0	0	2.17315716272601e-05	0	0	6.51947148817803e-05	0	0	0	8.69262865090403e-05	0	0	2.17315716272601e-05	4.34631432545202e-05	0	0	0.000391168289290681	0.000239047287899861	0.000130389429763561	0.000130389429763561	0.000152121001390821	0.000282510431154381	6.51947148817803e-05	0	0	0	0	0	0	0	0	0	k__Fungi;p__Ascomycota;c__Saccharomycetes;o__Saccharomycetales;f__unidentified;g__Candida;s__Candida_sp._BG01-8-5-001A-2-1
OTU_441	0	0	0	0	0	0	0	0	0	4.34631432545202e-05	0	0	4.34631432545202e-05	0.0001086578581363	0	0	0	0	0	0	0	0	0.000130389429763561	0.00139082058414465	0	0	2.17315716272601e-05	0	4.34631432545202e-05	0	4.34631432545202e-05	0	2.17315716272601e-05	0	0	0	k__Chloroplastida;p__Streptophyta;c__Embryophyta;o__Geraniales;f__unidentified
OTU_443	0	0	0	0	4.34631432545202e-05	0	4.34631432545202e-05	0	8.69262865090403e-05	0	0	0	4.34631432545202e-05	0	0	2.17315716272601e-05	4.34631432545202e-05	0	0	2.17315716272601e-05	6.51947148817803e-05	0	6.51947148817803e-05	2.17315716272601e-05	6.51947148817803e-05	4.34631432545202e-05	4.34631432545202e-05	0	0	0	0	0	0	0	0	0	k__Chloroplastida;p__Streptophyta;c__Embryophyta;o__Myrtales;f__unidentified;g__Meriania;s__Meriania_macrophylla
OTU_444	0.000173852573018081	6.51947148817803e-05	6.51947148817803e-05	4.34631432545202e-05	8.69262865090403e-05	0	8.69262865090403e-05	2.17315716272601e-05	0	0.0001086578581363	6.51947148817803e-05	0	0.000152121001390821	0	0	0.0001086578581363	0	0	0	0	0.0001086578581363	8.69262865090403e-05	4.34631432545202e-05	0.00115177329624478	0.0001086578581363	6.51947148817803e-05	6.51947148817803e-05	4.34631432545202e-05	0.000195584144645341	0	0	2.17315716272601e-05	0	0	0	0	Unclassified
OTU_445	0.000934457579972184	0.0011952364394993	0.00128216272600834	0.000586752433936022	0.00297722531293463	0.000956189151599444	0.000282510431154381	0.00182545201668985	0.00306415159944367	0.00215142559109875	0.000760605006954103	0.00580232962447844	0.0061500347705146	0.00128216272600834	0.00284683588317107	0.00104311543810848	0.00147774687065369	0.000630215577190542	0.00128216272600834	0.000912726008344923	0.001086578581363	0.00230354659248957	0.00162986787204451	0.000890994436717663	0.00410726703755216	0.00712795549374131	0.000499826147426982	0.00310761474269819	0.00115177329624478	0.000521557719054242	0.00197757301808067	0.000717141863699583	0.000434631432545202	0.000717141863699583	0.00215142559109875	0.000478094575799722	k__Fungi;p__Ascomycota;c__Dothideomycetes
OTU_446	0	0	0	0	0	0	2.17315716272601e-05	0	0	0.00136908901251739	0.0001086578581363	0.000239047287899861	0	0	0	8.69262865090403e-05	0	0	0	0	8.69262865090403e-05	0	0.000173852573018081	0	0.00145601529902643	4.34631432545202e-05	4.34631432545202e-05	0	0	0	0	0	0	0	0	0	k__Animalia;p__Arthropoda;c__unidentified;o__Collembola;f__unidentified;g__unidentified
OTU_447	0	8.69262865090403e-05	0	0	0	0	0	4.34631432545202e-05	0	0.000195584144645341	8.69262865090403e-05	4.34631432545202e-05	6.51947148817803e-05	2.17315716272601e-05	0	0	2.17315716272601e-05	0	0	0	0.000195584144645341	0.000152121001390821	8.69262865090403e-05	0.0001086578581363	0.000130389429763561	0.0001086578581363	6.51947148817803e-05	0.000130389429763561	0.000152121001390821	8.69262865090403e-05	4.34631432545202e-05	0.0001086578581363	6.51947148817803e-05	6.51947148817803e-05	2.17315716272601e-05	6.51947148817803e-05	k__Fungi;p__Ascomycota;c__Saccharomycetes;o__Saccharomycetales;f__Saccharomycodaceae;g__Hanseniaspora;s__Hanseniaspora_uvarum
OTU_448	0.000173852573018081	6.51947148817803e-05	4.34631432545202e-05	0	8.69262865090403e-05	6.51947148817803e-05	0.0001086578581363	0	4.34631432545202e-05	0.0001086578581363	0.000130389429763561	0.000130389429763561	0.000152121001390821	2.17315716272601e-05	4.34631432545202e-05	0	0	0	0	0	2.17315716272601e-05	0	0.000173852573018081	0.000152121001390821	0	0	0	0.000325973574408901	0.000173852573018081	4.34631432545202e-05	0.000152121001390821	0.000130389429763561	0.000152121001390821	6.51947148817803e-05	2.17315716272601e-05	2.17315716272601e-05	k__Fungi;p__Chytridiomycota;c__unidentified;o__unidentified;f__unidentified;g__Olpidium;s__uncultured_fungus
OTU_449	0.000325973574408901	0.000282510431154381	0.0001086578581363	0.000130389429763561	0.000152121001390821	0.000304242002781641	0.000130389429763561	0.000173852573018081	6.51947148817803e-05	0	0	0.000195584144645341	0	0	0	0	0	0	0	0	0	0	0.000304242002781641	0	0	0	0	0.000282510431154381	0	0	0	0	0	0	0	0	k__Fungi;p__Chytridiomycota;c__Chytridiomycetes
OTU_450	0.000195584144645341	0.000217315716272601	0.0001086578581363	0.000217315716272601	0.000239047287899861	0.000239047287899861	6.51947148817803e-05	6.51947148817803e-05	0.000934457579972184	0	0	0	0	0	0	4.34631432545202e-05	0	0	0	0.000434631432545202	0	0	0	0	0	0	2.17315716272601e-05	0	0	0	0	0	2.17315716272601e-05	0	0	0	k__Fungi;p__Ascomycota;c__Eurotiomycetes;o__unidentified;f__unidentified;g__Rhynchostoma;s__Rhynchostoma_minutum
OTU_451	0	0	8.69262865090403e-05	4.34631432545202e-05	0.000130389429763561	2.17315716272601e-05	0	0	0.00162986787204451	0	0	0	0	0	4.34631432545202e-05	0	0	0	0	0	2.17315716272601e-05	2.17315716272601e-05	0	0	0.0001086578581363	0	0	0	0	0	0	0	0	0	0	0	k__Eukaryota;p__LKM11;c__unidentified;o__unidentified;f__unidentified;g__unidentified;s__uncultured_eukaryote
OTU_452	0	0	0	0.000217315716272601	2.17315716272601e-05	0	0	0	0	0	0	0	2.17315716272601e-05	0	0	0.000130389429763561	0	0	0	0	4.34631432545202e-05	0.000239047287899861	0.000173852573018081	0.0001086578581363	2.17315716272601e-05	0	0.000912726008344923	0	4.34631432545202e-05	0	0	0.000152121001390821	0	0	0	0	k__Alveolata;p__Apicomplexa;c__Gregarinasina;o__Eugregarinorida;f__unidentified;g__Gregarina;s__Gregarina_caledia
OTU_453	8.69262865090403e-05	4.34631432545202e-05	4.34631432545202e-05	6.51947148817803e-05	4.34631432545202e-05	0	0	0	0.00204276773296245	0	0	0	0	0	0	2.17315716272601e-05	0	0	0	6.51947148817803e-05	0	0	0	0	6.51947148817803e-05	0	2.17315716272601e-05	0	0	0	0	4.34631432545202e-05	0	0	0	0	k__Chloroplastida;p__Chlorophyta;c__Trebouxiophyceae;o__unidentified;f__unidentified;g__Dictyochloropsis;s__Dictyochloropsis_symbiontica
OTU_454	0	0	0	4.34631432545202e-05	2.17315716272601e-05	0	2.17315716272601e-05	2.17315716272601e-05	0	0.0011952364394993	0.000173852573018081	0.000217315716272601	2.17315716272601e-05	6.51947148817803e-05	4.34631432545202e-05	8.69262865090403e-05	2.17315716272601e-05	4.34631432545202e-05	0	2.17315716272601e-05	2.17315716272601e-05	0	4.34631432545202e-05	0	0	0	2.17315716272601e-05	0.000782336578581363	0	4.34631432545202e-05	2.17315716272601e-05	0.000152121001390821	8.69262865090403e-05	6.51947148817803e-05	0	0	k__Fungi;p__Basidiomycota;c__Tremellomycetidae;o__Tremellales;f__unidentified;g__Fellomyces;s__Fellomyces_borneensis
OTU_455	0.000152121001390821	8.69262865090403e-05	0.000239047287899861	0.000130389429763561	0.000152121001390821	0.000152121001390821	0.000239047287899861	6.51947148817803e-05	6.51947148817803e-05	0.000325973574408901	0.000521557719054242	0.000391168289290681	0.000173852573018081	0.000282510431154381	0.000152121001390821	0.000325973574408901	8.69262865090403e-05	2.17315716272601e-05	0.000195584144645341	0.000152121001390821	0.000152121001390821	0.000804068150208623	0.000217315716272601	0.000934457579972184	0.000347705146036161	0.000434631432545202	0.000347705146036161	8.69262865090403e-05	0.000956189151599444	0.000499826147426982	0.000478094575799722	0.000738873435326843	0.000217315716272601	0.000173852573018081	0.000608484005563282	0.00691063977746871	k__Fungi;p__Ascomycota;c__Lecanoromycetes;o__unidentified;f__unidentified;g__unidentified;s__Byssoloma_leucoblepharum
OTU_456	0	0	4.34631432545202e-05	0	0	0	0	0	0	0	0	2.17315716272601e-05	0	0	0	0	0	0	0	0	6.51947148817803e-05	0.000434631432545202	0.000173852573018081	0	8.69262865090403e-05	8.69262865090403e-05	0	0	0	0	0	0	0	2.17315716272601e-05	0	0	k__Fungi;p__Basidiomycota;c__Agaricostilbomycetes;o__Agaricostilbales
OTU_457	0	0	0	0	0	0	0	0	0	0	0	2.17315716272601e-05	2.17315716272601e-05	4.34631432545202e-05	0	8.69262865090403e-05	6.51947148817803e-05	4.34631432545202e-05	2.17315716272601e-05	0	0	6.51947148817803e-05	0	0.00136908901251739	4.34631432545202e-05	0	2.17315716272601e-05	0	2.17315716272601e-05	0	0	0	0	2.17315716272601e-05	0	0	k__Fungi;p__Ascomycota;c__Saccharomycetes;o__Saccharomycetales;f__unidentified;g__Candida
OTU_458	6.51947148817803e-05	0	0	8.69262865090403e-05	0.000173852573018081	8.69262865090403e-05	0.0001086578581363	0	6.51947148817803e-05	0.000130389429763561	0.0001086578581363	4.34631432545202e-05	6.51947148817803e-05	0	6.51947148817803e-05	0.0001086578581363	6.51947148817803e-05	2.17315716272601e-05	4.34631432545202e-05	8.69262865090403e-05	0	4.34631432545202e-05	0	2.17315716272601e-05	0	0	2.17315716272601e-05	0.000130389429763561	8.69262865090403e-05	2.17315716272601e-05	4.34631432545202e-05	0.000239047287899861	0.000239047287899861	8.69262865090403e-05	8.69262865090403e-05	6.51947148817803e-05	k__Fungi;p__Basidiomycota;c__Tremellomycetidae;o__Cystofilobasidiales;f__Cystofilobasidiaceae;g__Cryptococcus;s__Cryptococcus_huempii
OTU_459	4.34631432545202e-05	0.0001086578581363	6.51947148817803e-05	0.0001086578581363	8.69262865090403e-05	0.000130389429763561	2.17315716272601e-05	2.17315716272601e-05	0.00215142559109875	0	0	0	0.0001086578581363	0	2.17315716272601e-05	8.69262865090403e-05	2.17315716272601e-05	2.17315716272601e-05	0	8.69262865090403e-05	8.69262865090403e-05	0	0	2.17315716272601e-05	0.000173852573018081	0.0001086578581363	2.17315716272601e-05	4.34631432545202e-05	0	0	6.51947148817803e-05	8.69262865090403e-05	0	0	0	0	k__Chloroplastida;p__Streptophyta;c__Embryophyta
OTU_460	0.000282510431154381	0.000130389429763561	0.000130389429763561	0.000217315716272601	0.000369436717663421	0.000260778859527121	0.000999652294853964	0.000152121001390821	0.00154294158553547	4.34631432545202e-05	6.51947148817803e-05	0.000195584144645341	0.000521557719054242	0.000130389429763561	0.000217315716272601	0	0.000304242002781641	6.51947148817803e-05	0	0.000586752433936022	0.000651947148817803	0.00126043115438108	0.000304242002781641	0.000152121001390821	0.000412899860917942	0.000173852573018081	0.000130389429763561	0	0	0	6.51947148817803e-05	0	4.34631432545202e-05	0	2.17315716272601e-05	0	k__Stramenopiles;p__unidentified;c__Chrysophyceae;o__Chromulinales;f__unidentified;g__Spumella
OTU_461	0.000347705146036161	0.000282510431154381	0	0.0001086578581363	0	4.34631432545202e-05	6.51947148817803e-05	0	0	0	4.34631432545202e-05	0	0.000152121001390821	0.0001086578581363	2.17315716272601e-05	2.17315716272601e-05	0	0	0	0	4.34631432545202e-05	0.000152121001390821	0.000760605006954103	6.51947148817803e-05	0.000152121001390821	4.34631432545202e-05	2.17315716272601e-05	0	6.51947148817803e-05	0	0	0	0	0	0	0	Unclassified
OTU_462	0	0	2.17315716272601e-05	0	0	0	0	0	0	0.000673678720445063	6.51947148817803e-05	0	0	0	0	0	0	0	0	0	0.000173852573018081	0	0	4.34631432545202e-05	0	0	0	0.000173852573018081	0.000217315716272601	2.17315716272601e-05	0	0.0001086578581363	8.69262865090403e-05	0.000130389429763561	6.51947148817803e-05	4.34631432545202e-05	k__Animalia;p__Nematoda;c__Enoplea;o__unidentified;f__Alaimidae;g__unidentified;s__Alaimus_sp._1247
OTU_463	2.17315716272601e-05	2.17315716272601e-05	2.17315716272601e-05	0	2.17315716272601e-05	8.69262865090403e-05	0	2.17315716272601e-05	0.00206449930458971	0	0	0	0	0	0	0	0	0	0	2.17315716272601e-05	0	0	6.51947148817803e-05	0	0	0	0	0	0	0	0	0	0	0	0	0	k__Chloroplastida;p__Streptophyta;c__Embryophyta;o__Gentianales;f__unidentified;g__Nertera;s__Nertera_dichondrifolia
OTU_464	6.51947148817803e-05	2.17315716272601e-05	2.17315716272601e-05	4.34631432545202e-05	6.51947148817803e-05	8.69262865090403e-05	0	0	0	8.69262865090403e-05	0.000369436717663421	0.000217315716272601	6.51947148817803e-05	6.51947148817803e-05	4.34631432545202e-05	0.000152121001390821	4.34631432545202e-05	0	4.34631432545202e-05	0	0.000195584144645341	4.34631432545202e-05	0.000130389429763561	0.000673678720445063	0.000565020862308762	0	0.000130389429763561	0	0	6.51947148817803e-05	0	4.34631432545202e-05	6.51947148817803e-05	2.17315716272601e-05	0	2.17315716272601e-05	k__Fungi;p__Basidiomycota;c__Agaricomycetes;o__Russulales;f__Peniophoraceae;g__Peniophora;s__Peniophora_nuda
OTU_465	0.00130389429763561	0.000195584144645341	4.34631432545202e-05	0	0	0.000195584144645341	2.17315716272601e-05	0	0	0	0	0	2.17315716272601e-05	4.34631432545202e-05	0	2.17315716272601e-05	0	0	0	0	2.17315716272601e-05	8.69262865090403e-05	0	0	0	0	0	2.17315716272601e-05	0	2.17315716272601e-05	2.17315716272601e-05	6.51947148817803e-05	0	2.17315716272601e-05	0.000239047287899861	0.000673678720445063	k__Eukaryota;p__RT5iin25;c__unidentified;o__unidentified;f__unidentified;g__unidentified;s__uncultured_freshwater_eukaryote
OTU_466	0.000217315716272601	0.000173852573018081	0.000152121001390821	4.34631432545202e-05	0.000130389429763561	8.69262865090403e-05	0.000478094575799722	2.17315716272601e-05	0	0	6.51947148817803e-05	0.000282510431154381	8.69262865090403e-05	0.000434631432545202	2.17315716272601e-05	6.51947148817803e-05	2.17315716272601e-05	0	0	0	0	0	0	0	0	4.34631432545202e-05	0	0	0.000478094575799722	4.34631432545202e-05	2.17315716272601e-05	6.51947148817803e-05	0	2.17315716272601e-05	0.000673678720445063	0.000586752433936022	k__Stramenopiles;p__Xanthophyceae;c__unidentified;o__Tribonematales;f__unidentified;g__unidentified;s__Botryidiopsidaceae_sp._PAB_836
OTU_467	0.000152121001390821	0.000152121001390821	0.000195584144645341	0.000130389429763561	0.000130389429763561	0.000152121001390821	0.000130389429763561	6.51947148817803e-05	8.69262865090403e-05	0	0.000499826147426982	0	0	0	0	0	0	0	0	0	0	0.000325973574408901	0	0	0	0	0	0	0	0	0	0	0	0	0	0	k__Fungi;p__unidentified;c__unidentified;o__unidentified;f__unidentified;g__uncultured;s__uncultured_fungus
OTU_468	0	0	0	0	0	0	0	0	2.17315716272601e-05	0	6.51947148817803e-05	4.34631432545202e-05	4.34631432545202e-05	2.17315716272601e-05	0	2.17315716272601e-05	2.17315716272601e-05	0	0.000130389429763561	0.0001086578581363	6.51947148817803e-05	0.000173852573018081	4.34631432545202e-05	0	0	0	2.17315716272601e-05	0	2.17315716272601e-05	0	4.34631432545202e-05	2.17315716272601e-05	0	4.34631432545202e-05	0	4.34631432545202e-05	k__Fungi;p__Ascomycota;c__Sordariomycetes;o__Hypocreales
OTU_469	0.000195584144645341	4.34631432545202e-05	6.51947148817803e-05	6.51947148817803e-05	4.34631432545202e-05	0	0.00102138386648122	2.17315716272601e-05	0	2.17315716272601e-05	0	2.17315716272601e-05	8.69262865090403e-05	2.17315716272601e-05	0	8.69262865090403e-05	4.34631432545202e-05	4.34631432545202e-05	0	0	0	0	2.17315716272601e-05	4.34631432545202e-05	4.34631432545202e-05	0	6.51947148817803e-05	0.000173852573018081	4.34631432545202e-05	2.17315716272601e-05	0	6.51947148817803e-05	0	0	0	0	k__Chloroplastida;p__Chlorophyta;c__Chlorophyceae;o__unidentified;f__unidentified;g__Chlamydomonas
OTU_470	8.69262865090403e-05	0.000130389429763561	6.51947148817803e-05	0.000325973574408901	0.000130389429763561	0.000499826147426982	0	0.000369436717663421	8.69262865090403e-05	0.001086578581363	0.000152121001390821	0.000173852573018081	0.000152121001390821	8.69262865090403e-05	2.17315716272601e-05	0.000130389429763561	8.69262865090403e-05	6.51947148817803e-05	0.00117350486787204	8.69262865090403e-05	0.000130389429763561	0.000282510431154381	0.000173852573018081	4.34631432545202e-05	0.000630215577190542	0.000478094575799722	4.34631432545202e-05	0.0001086578581363	0.000130389429763561	6.51947148817803e-05	0.0001086578581363	4.34631432545202e-05	4.34631432545202e-05	6.51947148817803e-05	0	6.51947148817803e-05	k__Fungi;p__Ascomycota
OTU_471	0	0.0001086578581363	6.51947148817803e-05	4.34631432545202e-05	6.51947148817803e-05	4.34631432545202e-05	0	0	0.00152121001390821	2.17315716272601e-05	0	0	8.69262865090403e-05	0	0	6.51947148817803e-05	0	2.17315716272601e-05	0	6.51947148817803e-05	2.17315716272601e-05	4.34631432545202e-05	0.000412899860917942	2.17315716272601e-05	0.000260778859527121	4.34631432545202e-05	2.17315716272601e-05	0	2.17315716272601e-05	0	4.34631432545202e-05	8.69262865090403e-05	2.17315716272601e-05	4.34631432545202e-05	4.34631432545202e-05	0	k__Chloroplastida;p__Phragmoplastophyta;c__unidentified;o__Zygnematales;f__unidentified;g__Mesotaenium;s__Mesotaenium_cf._chlamydosporum_M-2155
OTU_472	0	0	0	0	0	0	0.000695410292072323	0	0	0	0	8.69262865090403e-05	2.17315716272601e-05	0	0	0	0	0	0	2.17315716272601e-05	0	8.69262865090403e-05	0	4.34631432545202e-05	0.000152121001390821	0	0	0	0	0	0	0	0	0	0	0	k__Animalia;p__Arthropoda;c__Arachnida;o__unidentified;f__unidentified;g__unidentified;s__Amblyseius_sp._APGD-2010
OTU_473	4.34631432545202e-05	2.17315716272601e-05	6.51947148817803e-05	8.69262865090403e-05	0	6.51947148817803e-05	0	2.17315716272601e-05	0.00299895688456189	0	4.34631432545202e-05	0	0	0	0	0	0	0	0	8.69262865090403e-05	0	0	0	0	0	0	2.17315716272601e-05	0	0	0	0	0	0	0	8.69262865090403e-05	0	k__Fungi;p__Basidiomycota;c__Agaricomycetes;o__Polyporales;f__Dictyonemataceae;g__Dictyonema;s__Dictyonema_glabratum
OTU_474	0.000347705146036161	0	0	0	2.17315716272601e-05	2.17315716272601e-05	0	0	0	2.17315716272601e-05	4.34631432545202e-05	0	0.000369436717663421	4.34631432545202e-05	2.17315716272601e-05	0	4.34631432545202e-05	2.17315716272601e-05	0	0	4.34631432545202e-05	0.000195584144645341	2.17315716272601e-05	0.000239047287899861	0.0001086578581363	6.51947148817803e-05	2.17315716272601e-05	0	0.000130389429763561	0	0	0	0	6.51947148817803e-05	0	0	k__Alveolata;p__Ciliophora;c__Spirotrichea;o__unidentified;f__unidentified;g__Sterkiella
OTU_475	6.51947148817803e-05	0	0	0	0	0	0.00121696801112656	0.000651947148817803	8.69262865090403e-05	8.69262865090403e-05	0	2.17315716272601e-05	6.51947148817803e-05	0	2.17315716272601e-05	2.17315716272601e-05	2.17315716272601e-05	2.17315716272601e-05	0	4.34631432545202e-05	2.17315716272601e-05	0	0	0	2.17315716272601e-05	6.51947148817803e-05	0	0	4.34631432545202e-05	0	6.51947148817803e-05	0	0	4.34631432545202e-05	8.69262865090403e-05	0	k__Animalia;p__Annelida;c__unidentified;o__unidentified;f__Enchytraeidae;g__unidentified;s__uncultured_Phoroniformea_sp.
OTU_476	0.000347705146036161	4.34631432545202e-05	0	2.17315716272601e-05	0	0	0	0	0	0	0	6.51947148817803e-05	0.000521557719054242	0.0001086578581363	0.000195584144645341	6.51947148817803e-05	4.34631432545202e-05	2.17315716272601e-05	2.17315716272601e-05	6.51947148817803e-05	0	0	0	0.000325973574408901	2.17315716272601e-05	0	0	0	0.000173852573018081	0	0	0	0	0	2.17315716272601e-05	0	k__Chloroplastida;p__Phragmoplastophyta;c__unidentified;o__Zygnematales;f__unidentified;g__Mesotaenium
OTU_477	0	2.17315716272601e-05	0	4.34631432545202e-05	0	0	0	6.51947148817803e-05	0	0	0	0	0	0	0	0	4.34631432545202e-05	0	4.34631432545202e-05	0	0	4.34631432545202e-05	0	0	0.000869262865090403	4.34631432545202e-05	4.34631432545202e-05	0	0	8.69262865090403e-05	0	0	0	2.17315716272601e-05	0	0.000565020862308762	k__Fungi;p__Chytridiomycota;c__Chytridiomycetes;o__Chytridiales;f__unidentified;g__Chytriomyces;s__Chytriomyces_sp._JEL378
OTU_479	0	0	8.69262865090403e-05	0	0	0	0	0	0	0	0.000152121001390821	2.17315716272601e-05	6.51947148817803e-05	2.17315716272601e-05	0.00134735744089013	4.34631432545202e-05	6.51947148817803e-05	0	6.51947148817803e-05	0	4.34631432545202e-05	0	0	0	0	0.0001086578581363	0	0	0	0	0.000152121001390821	0	0	0	0	0	k__Fungi;p__Basidiomycota;c__Agaricomycetes;o__Cantharellales;f__Ceratobasidiaceae;g__Rhizoctonia;s__unidentified
OTU_480	2.17315716272601e-05	8.69262865090403e-05	4.34631432545202e-05	8.69262865090403e-05	0.000173852573018081	8.69262865090403e-05	6.51947148817803e-05	0	0	6.51947148817803e-05	0.000173852573018081	2.17315716272601e-05	4.34631432545202e-05	2.17315716272601e-05	4.34631432545202e-05	2.17315716272601e-05	8.69262865090403e-05	2.17315716272601e-05	0	6.51947148817803e-05	0.000152121001390821	0.0001086578581363	0.000152121001390821	4.34631432545202e-05	0.000130389429763561	6.51947148817803e-05	8.69262865090403e-05	0	0	0	8.69262865090403e-05	0.0001086578581363	0	2.17315716272601e-05	0.00171679415855355	2.17315716272601e-05	k__Fungi;p__Ascomycota;c__Eurotiomycetes;o__Eurotiales;f__Trichocomaceae;g__Penicillium;s__Talaromyces_purpurogenus
OTU_481	0.000304242002781641	0.000173852573018081	0.0001086578581363	0.000260778859527121	6.51947148817803e-05	0.0001086578581363	0.000195584144645341	6.51947148817803e-05	8.69262865090403e-05	0	0	0.000130389429763561	0	0	0	6.51947148817803e-05	0	0	0	0	0	0	0.000391168289290681	0	0	0	0	0.000173852573018081	0	0	0	0	0	6.51947148817803e-05	0	0	k__Fungi;p__Chytridiomycota;c__Chytridiomycetes;o__Chytridiales;f__unidentified
OTU_482	6.51947148817803e-05	4.34631432545202e-05	4.34631432545202e-05	4.34631432545202e-05	4.34631432545202e-05	4.34631432545202e-05	4.34631432545202e-05	0	0.00210796244784423	4.34631432545202e-05	6.51947148817803e-05	0	0	0	0	2.17315716272601e-05	0	0	0	0	0.0001086578581363	2.17315716272601e-05	0	0	0.000152121001390821	0	2.17315716272601e-05	0	0	0	0	0	0	0	0	0.000195584144645341	k__Rhizaria;p__Cercozoa;c__Metromonadea;o__unidentified;f__unidentified;g__Metopion;s__uncultured_eukaryote
OTU_483	6.51947148817803e-05	4.34631432545202e-05	0.0001086578581363	6.51947148817803e-05	6.51947148817803e-05	0	6.51947148817803e-05	0	0.000217315716272601	4.34631432545202e-05	0	6.51947148817803e-05	6.51947148817803e-05	8.69262865090403e-05	2.17315716272601e-05	4.34631432545202e-05	8.69262865090403e-05	6.51947148817803e-05	4.34631432545202e-05	0.000239047287899861	6.51947148817803e-05	0	0.000173852573018081	4.34631432545202e-05	6.51947148817803e-05	4.34631432545202e-05	2.17315716272601e-05	0	6.51947148817803e-05	6.51947148817803e-05	0	2.17315716272601e-05	6.51947148817803e-05	2.17315716272601e-05	6.51947148817803e-05	4.34631432545202e-05	k__Fungi
OTU_484	2.17315716272601e-05	4.34631432545202e-05	0	2.17315716272601e-05	2.17315716272601e-05	0	4.34631432545202e-05	2.17315716272601e-05	0	4.34631432545202e-05	0.000499826147426982	0.000260778859527121	4.34631432545202e-05	4.34631432545202e-05	4.34631432545202e-05	0	2.17315716272601e-05	0	0.0001086578581363	2.17315716272601e-05	6.51947148817803e-05	0.000173852573018081	6.51947148817803e-05	4.34631432545202e-05	0.000282510431154381	8.69262865090403e-05	0	0.00165159944367177	4.34631432545202e-05	0	0	0	0	2.17315716272601e-05	0.000521557719054242	0.000499826147426982	k__Rhizaria;p__Cercozoa;c__unidentified
OTU_485	8.69262865090403e-05	6.51947148817803e-05	0	6.51947148817803e-05	0	4.34631432545202e-05	0.0001086578581363	2.17315716272601e-05	0	4.34631432545202e-05	0.000195584144645341	0.000130389429763561	0.000152121001390821	8.69262865090403e-05	2.17315716272601e-05	0.000412899860917942	0	2.17315716272601e-05	0	0	0.000173852573018081	0.000260778859527121	0.000173852573018081	4.34631432545202e-05	8.69262865090403e-05	2.17315716272601e-05	0.000130389429763561	0	0	0	0	0	0	0	2.17315716272601e-05	0	k__Rhizaria;p__Cercozoa;c__Thecofilosea;o__Cryomonadida;f__Rhizaspididae;g__Rhogostoma;s__uncultured_cercozoan
OTU_486	0.000130389429763561	0	6.51947148817803e-05	2.17315716272601e-05	0	8.69262865090403e-05	2.17315716272601e-05	0.000239047287899861	4.34631432545202e-05	4.34631432545202e-05	0	0	0	0	0	0	4.34631432545202e-05	2.17315716272601e-05	6.51947148817803e-05	0	2.17315716272601e-05	0	8.69262865090403e-05	0.0001086578581363	2.17315716272601e-05	6.51947148817803e-05	2.17315716272601e-05	0.000239047287899861	0.000130389429763561	2.17315716272601e-05	0	4.34631432545202e-05	0	4.34631432545202e-05	0	0.000152121001390821	k__Fungi;p__unidentified;c__unidentified;o__Mucorales;f__unidentified;g__Mucor;s__Chaetocladium_brefeldii
OTU_488	0.0001086578581363	6.51947148817803e-05	2.17315716272601e-05	8.69262865090403e-05	0	4.34631432545202e-05	0.000152121001390821	0.000195584144645341	0	0	0	2.17315716272601e-05	0.000130389429763561	8.69262865090403e-05	2.17315716272601e-05	0.000130389429763561	4.34631432545202e-05	2.17315716272601e-05	0.000195584144645341	0	8.69262865090403e-05	6.51947148817803e-05	0.000152121001390821	0.000260778859527121	0.000152121001390821	8.69262865090403e-05	0.000130389429763561	4.34631432545202e-05	0.000130389429763561	0	0	2.17315716272601e-05	2.17315716272601e-05	4.34631432545202e-05	0	0.000195584144645341	k__Fungi;p__Basidiomycota;c__unidentified;o__Pucciniales;f__Phakopsoraceae;g__unidentified;s__unidentified
OTU_489	0.000282510431154381	0.000239047287899861	0.000195584144645341	0.000325973574408901	0.000369436717663421	0.000173852573018081	0.000130389429763561	8.69262865090403e-05	0.000586752433936022	0.00106484700973574	0.000804068150208623	0.00104311543810848	0.000717141863699583	0.000304242002781641	0.000217315716272601	0.000521557719054242	0.000717141863699583	0.000173852573018081	0.000130389429763561	0.000173852573018081	0.000347705146036161	0.000499826147426982	0.000391168289290681	0.000412899860917942	0.00149947844228095	0.000673678720445063	0.0049547983310153	0.00102138386648122	0.000369436717663421	0.000195584144645341	0.000391168289290681	0.000239047287899861	0.000369436717663421	0.000173852573018081	0.000869262865090403	0.00136908901251739	k__Fungi;p__Ascomycota;c__Orbiliomycetes;o__Orbiliales;f__Orbiliaceae
OTU_490	0	0	0	4.34631432545202e-05	2.17315716272601e-05	0	0	0	0	0	8.69262865090403e-05	0	0.0001086578581363	2.17315716272601e-05	6.51947148817803e-05	0.000217315716272601	0.000130389429763561	4.34631432545202e-05	0	4.34631432545202e-05	2.17315716272601e-05	0	4.34631432545202e-05	0	0	0	8.69262865090403e-05	0	0	0	4.34631432545202e-05	0	2.17315716272601e-05	0	0	0	k__Chloroplastida;p__Chlorophyta;c__Chlorophyceae;o__unidentified;f__unidentified;g__unidentified;s__uncultured_eukaryote
OTU_491	8.69262865090403e-05	4.34631432545202e-05	0	2.17315716272601e-05	6.51947148817803e-05	8.69262865090403e-05	0	0	0	0.00126043115438108	6.51947148817803e-05	0.000130389429763561	0.000152121001390821	0	8.69262865090403e-05	4.34631432545202e-05	0.000325973574408901	4.34631432545202e-05	0	4.34631432545202e-05	0.000195584144645341	6.51947148817803e-05	0.00178198887343533	8.69262865090403e-05	0.000195584144645341	0.000195584144645341	0.000130389429763561	0.000152121001390821	4.34631432545202e-05	0.0001086578581363	4.34631432545202e-05	4.34631432545202e-05	8.69262865090403e-05	6.51947148817803e-05	0	0	k__Fungi;p__Ascomycota;c__Dothideomycetes;o__Acrospermales;f__Acrospermaceae;g__Acrospermum
OTU_492	2.17315716272601e-05	4.34631432545202e-05	4.34631432545202e-05	4.34631432545202e-05	4.34631432545202e-05	0.000130389429763561	0.000478094575799722	0.00115177329624478	0	0	2.17315716272601e-05	0	6.51947148817803e-05	0	4.34631432545202e-05	6.51947148817803e-05	0	0	0	0	6.51947148817803e-05	6.51947148817803e-05	8.69262865090403e-05	4.34631432545202e-05	0	2.17315716272601e-05	2.17315716272601e-05	0	0.000173852573018081	2.17315716272601e-05	0	6.51947148817803e-05	0	4.34631432545202e-05	0.000195584144645341	0	k__Fungi;p__Ascomycota
OTU_493	0	0	0	0	0	0	2.17315716272601e-05	0.000391168289290681	6.51947148817803e-05	2.17315716272601e-05	0	0	0	0	2.17315716272601e-05	0	0	0	0	0	0.000521557719054242	6.51947148817803e-05	2.17315716272601e-05	0	0	4.34631432545202e-05	0.0001086578581363	0	0	0	0	0	0	0	0	0	k__Chloroplastida;p__Streptophyta;c__Embryophyta
OTU_494	4.34631432545202e-05	0.000217315716272601	6.51947148817803e-05	2.17315716272601e-05	0.000195584144645341	2.17315716272601e-05	0	0	0	0	0	0	0	0	0	0	2.17315716272601e-05	6.51947148817803e-05	0	0	0	0	2.17315716272601e-05	0	0.0001086578581363	0	2.17315716272601e-05	0.00106484700973574	2.17315716272601e-05	2.17315716272601e-05	4.34631432545202e-05	0	0	0	0	4.34631432545202e-05	k__Chloroplastida;p__Chlorophyta;c__Ulvophyceae;o__unidentified;f__unidentified;g__unidentified;s__uncultured_eukaryote
OTU_495	0	0	0	0	0	0	0	0	0	0	0	4.34631432545202e-05	6.51947148817803e-05	4.34631432545202e-05	2.17315716272601e-05	4.34631432545202e-05	0	0	0.000130389429763561	0	0	6.51947148817803e-05	0.00113004172461752	0	2.17315716272601e-05	0	2.17315716272601e-05	2.17315716272601e-05	0	0	0	0	0	0	0	0	k__Fungi;p__Chytridiomycota;c__Chytridiomycetes;o__Chytridiales;f__unidentified;g__Synchytrium;s__Synchytrium_minutum
OTU_496	2.17315716272601e-05	0	0	0.000260778859527121	0	2.17315716272601e-05	4.34631432545202e-05	0	2.17315716272601e-05	0	4.34631432545202e-05	6.51947148817803e-05	2.17315716272601e-05	2.17315716272601e-05	2.17315716272601e-05	0.00147774687065369	2.17315716272601e-05	6.51947148817803e-05	2.17315716272601e-05	0	0	0	0	0	0	0	0.000130389429763561	0	4.34631432545202e-05	0	0	0.000130389429763561	0	0	0	4.34631432545202e-05	k__Alveolata;p__Ciliophora;c__Colpodea;o__Colpodida;f__unidentified;g__Pseudoplatyophyra;s__uncultured_eukaryote
OTU_497	0.000195584144645341	0	0.000173852573018081	6.51947148817803e-05	0	6.51947148817803e-05	0.000347705146036161	0	0.00195584144645341	0	0.000239047287899861	0.000130389429763561	6.51947148817803e-05	0	0	0	0	0	0	4.34631432545202e-05	0	0	2.17315716272601e-05	0	0	0	0	4.34631432545202e-05	0	0	0	0	2.17315716272601e-05	0	0	0	k__Stramenopiles;p__Xanthophyceae;c__unidentified;o__Tribonematales;f__unidentified;g__unidentified;s__Xanthonema_sessile
OTU_498	0.0001086578581363	0	6.51947148817803e-05	2.17315716272601e-05	0	0.000260778859527121	0.000608484005563282	2.17315716272601e-05	6.51947148817803e-05	4.34631432545202e-05	0	6.51947148817803e-05	4.34631432545202e-05	0	0.000999652294853964	0	2.17315716272601e-05	0	0	0	2.17315716272601e-05	2.17315716272601e-05	4.34631432545202e-05	0	0.000369436717663421	0	2.17315716272601e-05	0	8.69262865090403e-05	0	0	0	0	0	0	0	k__Rhizaria;p__Cercozoa;c__Thecofilosea;o__unidentified;f__unidentified;g__uncultured;s__Phaseoleae_environmental_sample
OTU_499	0	4.34631432545202e-05	0	0	0	2.17315716272601e-05	6.51947148817803e-05	0	0	0	4.34631432545202e-05	0	0	0	0	0	0	0	0	0	8.69262865090403e-05	0.000608484005563282	0.000152121001390821	6.51947148817803e-05	0.0001086578581363	0.0001086578581363	6.51947148817803e-05	0	2.17315716272601e-05	4.34631432545202e-05	0	0	0	2.17315716272601e-05	0	0	k__Alveolata;p__Apicomplexa;c__Gregarinasina;o__Eugregarinorida;f__unidentified;g__Gregarina
OTU_500	0.000130389429763561	0	0	0	0	0	0.000195584144645341	0	0	0	2.17315716272601e-05	2.17315716272601e-05	0.000173852573018081	0	2.17315716272601e-05	0	2.17315716272601e-05	2.17315716272601e-05	2.17315716272601e-05	0	2.17315716272601e-05	0.000152121001390821	4.34631432545202e-05	0.000173852573018081	2.17315716272601e-05	4.34631432545202e-05	4.34631432545202e-05	0	4.34631432545202e-05	4.34631432545202e-05	0	0	0	0	0	0	k__Rhizaria;p__Cercozoa;c__Thecofilosea;o__Cryomonadida;f__Rhizaspididae;g__Rhogostoma;s__uncultured_eukaryote
OTU_501	6.51947148817803e-05	0.000608484005563282	4.34631432545202e-05	6.51947148817803e-05	4.34631432545202e-05	6.51947148817803e-05	0.00130389429763561	0	0	0	0	0	0	0	0	0	0	0	0	0	0	2.17315716272601e-05	0.000130389429763561	2.17315716272601e-05	4.34631432545202e-05	2.17315716272601e-05	0	0	0	4.34631432545202e-05	0	0	0	0	0	0	k__Chloroplastida;p__Chlorophyta;c__Trebouxiophyceae;o__unidentified;f__unidentified;g__Kalinella;s__Kalinella_apyrenoidosa
OTU_502	4.34631432545202e-05	4.34631432545202e-05	8.69262865090403e-05	6.51947148817803e-05	4.34631432545202e-05	0	2.17315716272601e-05	2.17315716272601e-05	0.00152121001390821	0	0	0	0	0	0	0	0	0	0	8.69262865090403e-05	0	0	0.0001086578581363	0	0	0	2.17315716272601e-05	0	0	0	0	0	0	0	0	0	k__Fungi
OTU_503	0.000152121001390821	0.000304242002781641	8.69262865090403e-05	0.000260778859527121	0.0001086578581363	0.000173852573018081	0.000673678720445063	6.51947148817803e-05	0.000173852573018081	0.000152121001390821	0.000456363004172462	0.000130389429763561	0.000347705146036161	0.000478094575799722	0.000217315716272601	0.00104311543810848	0.000391168289290681	0.000173852573018081	8.69262865090403e-05	6.51947148817803e-05	0.000434631432545202	0.000369436717663421	0.000239047287899861	0.00139082058414465	0.000608484005563282	0.000217315716272601	0.000521557719054242	6.51947148817803e-05	0.000239047287899861	8.69262865090403e-05	0.000152121001390821	0.000630215577190542	8.69262865090403e-05	0.000130389429763561	2.17315716272601e-05	2.17315716272601e-05	k__Fungi;p__Basidiomycota;c__Agaricomycetes;o__unidentified;f__unidentified
OTU_504	0.0001086578581363	0.0001086578581363	0.000130389429763561	4.34631432545202e-05	0.000130389429763561	0.000130389429763561	6.51947148817803e-05	6.51947148817803e-05	0.0001086578581363	2.17315716272601e-05	0.000260778859527121	6.51947148817803e-05	2.17315716272601e-05	0	0	0	2.17315716272601e-05	0	0	0	4.34631432545202e-05	0.000325973574408901	6.51947148817803e-05	0	0	0	0	0	4.34631432545202e-05	0	4.34631432545202e-05	0	0	0	0	0	k__Fungi;p__Chytridiomycota;c__Chytridiomycetes
OTU_505	4.34631432545202e-05	0	2.17315716272601e-05	0.000130389429763561	0	0.0001086578581363	4.34631432545202e-05	2.17315716272601e-05	0	4.34631432545202e-05	0	0.000152121001390821	6.51947148817803e-05	2.17315716272601e-05	0	0.000152121001390821	6.51947148817803e-05	0	6.51947148817803e-05	0	0	0	0	2.17315716272601e-05	0	0	6.51947148817803e-05	2.17315716272601e-05	6.51947148817803e-05	2.17315716272601e-05	6.51947148817803e-05	2.17315716272601e-05	0	0	0	0.00176025730180807	k__Chloroplastida;p__Chlorophyta;c__Chlorophyceae;o__unidentified;f__unidentified;g__Lobochlamys;s__Lobochlamys_culleus
OTU_506	0	0	6.51947148817803e-05	0	6.51947148817803e-05	0	4.34631432545202e-05	0	0	2.17315716272601e-05	4.34631432545202e-05	0	0	0	2.17315716272601e-05	0	2.17315716272601e-05	4.34631432545202e-05	6.51947148817803e-05	0	8.69262865090403e-05	6.51947148817803e-05	8.69262865090403e-05	2.17315716272601e-05	0.000173852573018081	0.000217315716272601	4.34631432545202e-05	0	0	0	0	0	4.34631432545202e-05	2.17315716272601e-05	0.000217315716272601	0	k__Fungi;p__Ascomycota;c__Dothideomycetes
OTU_507	0	0	0	0	0.000673678720445063	0	0	0	0	6.51947148817803e-05	0.000304242002781641	0	0	0	0	0	0.000347705146036161	0	0	0	0	0	0	0	0	0	0	0.0001086578581363	4.34631432545202e-05	2.17315716272601e-05	0	0	0.000152121001390821	0	4.34631432545202e-05	8.69262865090403e-05	k__Stramenopiles;p__MAST-12;c__unidentified;o__unidentified;f__unidentified;g__unidentified;s__uncultured_stramenopile
OTU_508	0	2.17315716272601e-05	6.51947148817803e-05	0	4.34631432545202e-05	0	0	0	0.00171679415855355	0	0.000152121001390821	0	0	0	0	0	0	0	0	0	0	0	0	0	0	0	0	0	0	0	2.17315716272601e-05	0	0	0	0	4.34631432545202e-05	k__Animalia;p__unidentified;c__unidentified;o__Acipenseriformes;f__unidentified;g__unidentified;s__unidentified
OTU_509	0.000239047287899861	8.69262865090403e-05	0.0001086578581363	0.000499826147426982	0.000260778859527121	6.51947148817803e-05	4.34631432545202e-05	0.0001086578581363	6.51947148817803e-05	0.000325973574408901	0.000478094575799722	0.000347705146036161	0.000478094575799722	0.000478094575799722	0.0001086578581363	0.000565020862308762	0.000325973574408901	8.69262865090403e-05	0.000282510431154381	0.000173852573018081	4.34631432545202e-05	0.000152121001390821	0.000173852573018081	8.69262865090403e-05	0.000217315716272601	0.000325973574408901	0.000152121001390821	4.34631432545202e-05	0.000195584144645341	2.17315716272601e-05	0.000195584144645341	0.000195584144645341	4.34631432545202e-05	8.69262865090403e-05	0.000173852573018081	0.000586752433936022	k__Fungi;p__Ascomycota
OTU_510	6.51947148817803e-05	0.0001086578581363	0.000173852573018081	8.69262865090403e-05	0.000173852573018081	0.000152121001390821	2.17315716272601e-05	0.000130389429763561	0.000347705146036161	0	0	0	0	0	2.17315716272601e-05	0	0	0	0	0.000239047287899861	0	0	0	0	0	0	0	0	0	0	0	0	0	0	0	0	k__Fungi;p__Chytridiomycota;c__Chytridiomycetes
OTU_511	0	0	0	2.17315716272601e-05	4.34631432545202e-05	0	0	2.17315716272601e-05	0	2.17315716272601e-05	0.000217315716272601	2.17315716272601e-05	0	0	0	0.000239047287899861	0	0	2.17315716272601e-05	0	0	0.0001086578581363	0	0	0	0	0	0	0	0	0	6.51947148817803e-05	0.000825799721835883	0	0	0	Unclassified
OTU_512	2.17315716272601e-05	0	2.17315716272601e-05	2.17315716272601e-05	0	0	2.17315716272601e-05	0	0	0	0	0	2.17315716272601e-05	4.34631432545202e-05	0	0.000195584144645341	0	0	0	0	6.51947148817803e-05	2.17315716272601e-05	2.17315716272601e-05	4.34631432545202e-05	0.00167333101529903	4.34631432545202e-05	8.69262865090403e-05	0	0	4.34631432545202e-05	0	0	0	8.69262865090403e-05	0	0	k__Fungi;p__Ascomycota;c__Sordariomycetes;o__Hypocreales;f__Clavicipitaceae;g__Metarhizium;s__Metarhizium_anisopliae
OTU_514	0	0	6.51947148817803e-05	2.17315716272601e-05	0	0.000869262865090403	2.17315716272601e-05	0	0	0	0	0	0	0	0.000434631432545202	0	0	4.34631432545202e-05	0	0	0	0	2.17315716272601e-05	6.51947148817803e-05	0	0	0	4.34631432545202e-05	8.69262865090403e-05	0	0	0	0	4.34631432545202e-05	0	0	k__Chloroplastida;p__Streptophyta;c__Liliopsida;o__Magnoliophyta;f__unidentified;g__unidentified;s__Iris_tenax
OTU_515	2.17315716272601e-05	0	2.17315716272601e-05	0	0	0	0.000456363004172462	0	4.34631432545202e-05	0	0.00104311543810848	2.17315716272601e-05	0	0	0	4.34631432545202e-05	0	0	0	0	0	0	0	0	0	0	0	0	0	0	0	2.17315716272601e-05	0	4.34631432545202e-05	0	0	k__Fungi;p__Basidiomycota;c__Agaricomycetes;o__Phallales;f__Phallaceae;g__Phallus;s__Phallus_hadriani
OTU_516	0.000195584144645341	0.000195584144645341	0.000130389429763561	0.000195584144645341	0.000130389429763561	0.000282510431154381	0.000217315716272601	8.69262865090403e-05	0.000152121001390821	6.51947148817803e-05	0.000260778859527121	2.17315716272601e-05	0	2.17315716272601e-05	2.17315716272601e-05	2.17315716272601e-05	6.51947148817803e-05	0	0	0	2.17315716272601e-05	0.000369436717663421	0	0	0	0	0	0	0	0	0	0	0	0	0	0	k__Stramenopiles;p__Diatomea;c__Bacillariophyceae;o__unidentified;f__unidentified;g__unidentified;s__uncultured_marine_picoeukaryote
OTU_517	0	0	0	0	0	0	0	0	0	0	0	0	4.34631432545202e-05	0	0	0	0	0	0	0	4.34631432545202e-05	6.51947148817803e-05	2.17315716272601e-05	0.001086578581363	2.17315716272601e-05	0	2.17315716272601e-05	0	4.34631432545202e-05	0	0	0	0	0	0	0	k__Fungi;p__Basidiomycota;c__Agaricomycetes
OTU_518	0	0	2.17315716272601e-05	4.34631432545202e-05	0	0	0.000890994436717663	0	0	0	0	0	0	0	4.34631432545202e-05	0	0	0	0	0	2.17315716272601e-05	6.51947148817803e-05	0.0001086578581363	2.17315716272601e-05	4.34631432545202e-05	2.17315716272601e-05	0	0	0	2.17315716272601e-05	6.51947148817803e-05	0	0	0	0	6.51947148817803e-05	k__Fungi;p__Ascomycota;c__Lecanoromycetes;o__unidentified;f__unidentified;g__unidentified
OTU_519	6.51947148817803e-05	0	2.17315716272601e-05	0	0	0	0	0	0	2.17315716272601e-05	6.51947148817803e-05	0	6.51947148817803e-05	0	2.17315716272601e-05	0	2.17315716272601e-05	0	0	2.17315716272601e-05	0	6.51947148817803e-05	0	4.34631432545202e-05	0	0	0	0	0.000217315716272601	0	0	2.17315716272601e-05	0	0	4.34631432545202e-05	0	k__Chloroplastida;p__Streptophyta;c__Embryophyta;o__Gleicheniales;f__unidentified;g__Dicranopteris;s__Dicranopteris_linearis
OTU_520	2.17315716272601e-05	0.000152121001390821	8.69262865090403e-05	6.51947148817803e-05	6.51947148817803e-05	8.69262865090403e-05	0	2.17315716272601e-05	0.00152121001390821	0	0	0	0	0.000130389429763561	0	2.17315716272601e-05	0	0	0	0.000130389429763561	8.69262865090403e-05	4.34631432545202e-05	4.34631432545202e-05	4.34631432545202e-05	0.000912726008344923	0.0001086578581363	4.34631432545202e-05	0	2.17315716272601e-05	0.000130389429763561	0	0	0	0	0	0	k__Fungi;p__Ascomycota;c__Lecanoromycetes;o__unidentified;f__unidentified;g__unidentified
OTU_521	6.51947148817803e-05	8.69262865090403e-05	0	0	6.51947148817803e-05	4.34631432545202e-05	0	2.17315716272601e-05	2.17315716272601e-05	2.17315716272601e-05	2.17315716272601e-05	0.000217315716272601	0.000195584144645341	6.51947148817803e-05	0	2.17315716272601e-05	0	2.17315716272601e-05	2.17315716272601e-05	6.51947148817803e-05	0.000152121001390821	0.000130389429763561	0	8.69262865090403e-05	0	0.0001086578581363	4.34631432545202e-05	2.17315716272601e-05	0	0	0	0	0	6.51947148817803e-05	0.000173852573018081	0	k__Fungi;p__Ascomycota;c__Dothideomycetes;o__Capnodiales
OTU_523	0.000173852573018081	8.69262865090403e-05	0.000260778859527121	0.000260778859527121	0.000130389429763561	0	0.000152121001390821	4.34631432545202e-05	0.0001086578581363	0	0	6.51947148817803e-05	4.34631432545202e-05	4.34631432545202e-05	0	8.69262865090403e-05	0	0	0	0	0	0	0.000239047287899861	0	0	0	4.34631432545202e-05	0.000173852573018081	0	0	6.51947148817803e-05	2.17315716272601e-05	0	0	0	6.51947148817803e-05	k__Chloroplastida;p__Chlorophyta;c__Chlorophyceae;o__unidentified;f__unidentified;g__unidentified
OTU_524	0	0	0	0	4.34631432545202e-05	0	0	0.000325973574408901	0	0.000412899860917942	0.000391168289290681	0	2.17315716272601e-05	0	0	0	0.000738873435326843	0	0	0	2.17315716272601e-05	2.17315716272601e-05	0.00143428372739917	6.51947148817803e-05	6.51947148817803e-05	0	0	0.000217315716272601	4.34631432545202e-05	0	0	0	0	2.17315716272601e-05	0	0	k__Animalia;p__Arthropoda;c__Arachnida;o__unidentified;f__unidentified;g__unidentified;s__Araneoidea_sp._JA-2011
OTU_525	6.51947148817803e-05	4.34631432545202e-05	0	0	0	0	0	0	0	0.000673678720445063	0	0.000173852573018081	0.000173852573018081	0.000260778859527121	8.69262865090403e-05	4.34631432545202e-05	2.17315716272601e-05	8.69262865090403e-05	2.17315716272601e-05	0	0.0001086578581363	0	4.34631432545202e-05	0.000869262865090403	0.000173852573018081	6.51947148817803e-05	0.000173852573018081	0	0	4.34631432545202e-05	6.51947148817803e-05	0	2.17315716272601e-05	0	0	0	k__Fungi;p__Basidiomycota;c__Exobasidiomycetidae;o__Entylomatales;f__Entylomataceae;g__Entyloma
OTU_529	0.000239047287899861	0.000586752433936022	0.000282510431154381	0.000869262865090403	0.00130389429763561	0.000282510431154381	0.0001086578581363	0.0001086578581363	0.000152121001390821	0.001086578581363	0.000217315716272601	0.000934457579972184	0.000673678720445063	0.000651947148817803	0.000325973574408901	0.000478094575799722	0.000912726008344923	0.000391168289290681	0.000325973574408901	0.000282510431154381	0.000195584144645341	0.000521557719054242	0.000239047287899861	0.000152121001390821	0.000630215577190542	0.000391168289290681	0.000304242002781641	0.000195584144645341	0.000325973574408901	0.000130389429763561	0.0001086578581363	0.000130389429763561	0.000369436717663421	0.000130389429763561	0.000217315716272601	2.17315716272601e-05	k__Fungi;p__Ascomycota
OTU_530	4.34631432545202e-05	0	8.69262865090403e-05	6.51947148817803e-05	4.34631432545202e-05	4.34631432545202e-05	0	2.17315716272601e-05	0	0	0.000217315716272601	0	0	0	0.0001086578581363	0	0	0	6.51947148817803e-05	0	4.34631432545202e-05	4.34631432545202e-05	0.000325973574408901	6.51947148817803e-05	0.000130389429763561	0.000239047287899861	6.51947148817803e-05	0	0	0	0	4.34631432545202e-05	0	0	0	0	k__Fungi;p__Ascomycota;c__Sordariomycetes;o__Hypocreales
OTU_531	0	0	0.000152121001390821	4.34631432545202e-05	4.34631432545202e-05	0	0	0	2.17315716272601e-05	0	0	0	0	0	0	0	8.69262865090403e-05	2.17315716272601e-05	0	0	4.34631432545202e-05	0.0001086578581363	4.34631432545202e-05	0.000347705146036161	0.000152121001390821	0.000217315716272601	6.51947148817803e-05	0	0	0	4.34631432545202e-05	2.17315716272601e-05	4.34631432545202e-05	0	0	0	k__Fungi;p__Basidiomycota;c__Agaricomycetes;o__Cantharellales;f__Botryobasidiaceae;g__Botryobasidium;s__Botryobasidium_obtusisporum
OTU_532	0	0	0	6.51947148817803e-05	0	0	0	0	0	0.0001086578581363	0.0001086578581363	0.000217315716272601	4.34631432545202e-05	0	0	0	0	0	0	0	2.17315716272601e-05	0	0.000369436717663421	0	0	6.51947148817803e-05	0	0.000434631432545202	6.51947148817803e-05	4.34631432545202e-05	4.34631432545202e-05	6.51947148817803e-05	4.34631432545202e-05	0.0001086578581363	8.69262865090403e-05	2.17315716272601e-05	k__Fungi;p__Ascomycota;c__Eurotiomycetes;o__Verrucariales;f__Verrucariaceae
OTU_534	0.000130389429763561	2.17315716272601e-05	0	4.34631432545202e-05	4.34631432545202e-05	8.69262865090403e-05	0.0001086578581363	4.34631432545202e-05	0.000282510431154381	0	4.34631432545202e-05	0.000173852573018081	4.34631432545202e-05	6.51947148817803e-05	0	0	4.34631432545202e-05	0	0	0	4.34631432545202e-05	0.000152121001390821	2.17315716272601e-05	2.17315716272601e-05	0	6.51947148817803e-05	0	0	0	6.51947148817803e-05	4.34631432545202e-05	0	0	2.17315716272601e-05	0	0	k__Chloroplastida;p__Chlorophyta
OTU_535	6.51947148817803e-05	0	4.34631432545202e-05	4.34631432545202e-05	4.34631432545202e-05	2.17315716272601e-05	0.000152121001390821	0	0	0	2.17315716272601e-05	0	8.69262865090403e-05	8.69262865090403e-05	4.34631432545202e-05	2.17315716272601e-05	0	0	2.17315716272601e-05	0	0	4.34631432545202e-05	0	0	4.34631432545202e-05	0	0	0	4.34631432545202e-05	2.17315716272601e-05	0	0	0	0	0	0.000869262865090403	k__Chloroplastida;p__Chlorophyta;c__Chlorophyceae;o__unidentified;f__unidentified;g__unidentified
OTU_536	2.17315716272601e-05	0	0	0	4.34631432545202e-05	0	0	0	6.51947148817803e-05	0	0.000152121001390821	4.34631432545202e-05	6.51947148817803e-05	6.51947148817803e-05	2.17315716272601e-05	0.0001086578581363	0.000717141863699583	0.0001086578581363	6.51947148817803e-05	0	0	0	0	0	2.17315716272601e-05	0	0	0	4.34631432545202e-05	0	0	0	0.0001086578581363	0	0	0	k__Chloroplastida;p__Streptophyta;c__Embryophyta;o__Lamiales;f__unidentified;g__Mazus;s__Mazus_pumilus
OTU_537	4.34631432545202e-05	2.17315716272601e-05	0	6.51947148817803e-05	0	0.0001086578581363	2.17315716272601e-05	2.17315716272601e-05	0	0	0.000412899860917942	6.51947148817803e-05	0.000130389429763561	0.000217315716272601	6.51947148817803e-05	8.69262865090403e-05	8.69262865090403e-05	0.000195584144645341	4.34631432545202e-05	6.51947148817803e-05	0	4.34631432545202e-05	0	0	8.69262865090403e-05	0	2.17315716272601e-05	0	8.69262865090403e-05	8.69262865090403e-05	0	2.17315716272601e-05	0	6.51947148817803e-05	4.34631432545202e-05	0	k__Fungi;p__Ascomycota;c__Pezizomycetes;o__Pezizales
OTU_538	6.51947148817803e-05	0	2.17315716272601e-05	2.17315716272601e-05	0	0	0	0	0	0	4.34631432545202e-05	6.51947148817803e-05	0.00165159944367177	8.69262865090403e-05	8.69262865090403e-05	0.000434631432545202	0.0001086578581363	0	4.34631432545202e-05	0	0.000217315716272601	0.000804068150208623	4.34631432545202e-05	0.000412899860917942	0	8.69262865090403e-05	8.69262865090403e-05	0	8.69262865090403e-05	0	0	0	0	0	0	0	k__Alveolata;p__Ciliophora;c__Oligohymenophorea;o__Conthreep;f__unidentified
OTU_540	0	8.69262865090403e-05	4.34631432545202e-05	0	0	4.34631432545202e-05	2.17315716272601e-05	0	4.34631432545202e-05	2.17315716272601e-05	0	2.17315716272601e-05	0	4.34631432545202e-05	0	0	2.17315716272601e-05	0	0	0	0.000130389429763561	0.000130389429763561	0.000195584144645341	0.0001086578581363	0.000304242002781641	0.000173852573018081	0.000152121001390821	6.51947148817803e-05	0	8.69262865090403e-05	0	0	0	2.17315716272601e-05	0	0	k__Alveolata;p__Ciliophora;c__Nassophorea;o__Conthreep;f__unidentified;g__Leptopharynx;s__Leptopharynx_sp._TS-2011
OTU_541	4.34631432545202e-05	0	2.17315716272601e-05	0	0	4.34631432545202e-05	0	2.17315716272601e-05	0	0	2.17315716272601e-05	0.000391168289290681	0.000130389429763561	0.000152121001390821	2.17315716272601e-05	6.51947148817803e-05	6.51947148817803e-05	0.0001086578581363	0	4.34631432545202e-05	6.51947148817803e-05	0	0	0	6.51947148817803e-05	4.34631432545202e-05	0	2.17315716272601e-05	8.69262865090403e-05	6.51947148817803e-05	0	2.17315716272601e-05	0	2.17315716272601e-05	0.000391168289290681	0	k__Fungi;p__Ascomycota;c__Taphrinomycetes;o__Taphrinales;f__Taphrinaceae;g__Taphrina
OTU_542	0	4.34631432545202e-05	0	0	4.34631432545202e-05	0.0001086578581363	0	2.17315716272601e-05	0.00128216272600834	0	0.000217315716272601	0	0	8.69262865090403e-05	0	0	0	2.17315716272601e-05	0	8.69262865090403e-05	0	4.34631432545202e-05	0	0	2.17315716272601e-05	0	0	0	6.51947148817803e-05	0	0	0	2.17315716272601e-05	0	0.000173852573018081	2.17315716272601e-05	k__Fungi;p__Basidiomycota
OTU_543	0	0	0	4.34631432545202e-05	6.51947148817803e-05	8.69262865090403e-05	0	0	0.00126043115438108	0	0	0	0	0	0	0	0	0	0	2.17315716272601e-05	0	0	0	0	0	0	0	0	0	0	0	0	0	0	0	0	k__Chloroplastida;p__Streptophyta;c__Embryophyta;o__Ranunculales;f__unidentified;g__Akebia;s__Akebia_quinata
OTU_544	0	0	0	0	0	2.17315716272601e-05	0	0	0	0	4.34631432545202e-05	0	2.17315716272601e-05	0	0	2.17315716272601e-05	2.17315716272601e-05	0	0	0	0.0001086578581363	8.69262865090403e-05	0.000825799721835883	0	0	2.17315716272601e-05	2.17315716272601e-05	0	0	0	0	0	0	2.17315716272601e-05	0	0	k__Fungi;p__Basidiomycota;c__unidentified;o__Classiculales;f__unidentified;g__Classicula;s__Classicula_fluitans
OTU_545	2.17315716272601e-05	0	0	6.51947148817803e-05	6.51947148817803e-05	2.17315716272601e-05	0	2.17315716272601e-05	0	0	2.17315716272601e-05	0	2.17315716272601e-05	0	0	0	2.17315716272601e-05	0	0	0	0	2.17315716272601e-05	0	2.17315716272601e-05	0.000282510431154381	6.51947148817803e-05	2.17315716272601e-05	4.34631432545202e-05	0	2.17315716272601e-05	0	8.69262865090403e-05	0	0	4.34631432545202e-05	0.00102138386648122	k__Chloroplastida;p__Chlorophyta;c__Trebouxiophyceae;o__unidentified;f__unidentified
OTU_547	0	0	0	0	4.34631432545202e-05	0	0	0	0	2.17315716272601e-05	4.34631432545202e-05	0	0	0	0	0	2.17315716272601e-05	0	0	0	4.34631432545202e-05	2.17315716272601e-05	0.000282510431154381	0	6.51947148817803e-05	2.17315716272601e-05	0	0	0	0	0	0	0.000956189151599444	6.51947148817803e-05	0.000195584144645341	0	k__Fungi;p__unidentified;c__unidentified;o__Mucorales;f__unidentified;g__Umbelopsis;s__Umbelopsis_sp._Y14_EG-2010
OTU_548	6.51947148817803e-05	0	0	2.17315716272601e-05	0	4.34631432545202e-05	0	0	0	2.17315716272601e-05	0.000977920723226704	0	0	0	0	0.000173852573018081	2.17315716272601e-05	2.17315716272601e-05	0	0	0	2.17315716272601e-05	0	0	0	0	4.34631432545202e-05	0	0	0	0	4.34631432545202e-05	2.17315716272601e-05	0	0	0	k__Stramenopiles;p__Diatomea;c__Bacillariophyceae;o__unidentified;f__unidentified;g__Craticula;s__Craticula_importuna
OTU_549	6.51947148817803e-05	0	6.51947148817803e-05	8.69262865090403e-05	4.34631432545202e-05	8.69262865090403e-05	2.17315716272601e-05	0	0.00113004172461752	0	0	0	0	0	0	0	0	0	0	0.0001086578581363	0	0	0	0	0	0	0	0	0	0	0	0	0	0	0	0	k__Fungi;p__Ascomycota;c__Arthoniomycetes;o__unidentified;f__unidentified;g__unidentified
OTU_551	0	0	0	0	0	0	0	0	6.51947148817803e-05	0	0	0	0	0	0	0	0	0	0	4.34631432545202e-05	0	4.34631432545202e-05	0	0	2.17315716272601e-05	0	0	0	0	0	0	0	0	0	0	0	k__Chloroplastida;p__Streptophyta;c__Liliopsida;o__Magnoliophyta;f__unidentified;g__unidentified;s__Allium_tuberosum
OTU_552	0	6.51947148817803e-05	2.17315716272601e-05	0.000304242002781641	0	0	2.17315716272601e-05	0.000152121001390821	0	0	0	6.51947148817803e-05	2.17315716272601e-05	8.69262865090403e-05	4.34631432545202e-05	0.000217315716272601	0	0	6.51947148817803e-05	0	0.000195584144645341	0.000239047287899861	0.000412899860917942	6.51947148817803e-05	0.000347705146036161	0.000217315716272601	0.000695410292072323	4.34631432545202e-05	0	2.17315716272601e-05	4.34631432545202e-05	0.000239047287899861	0	0	0	6.51947148817803e-05	Unclassified
OTU_553	4.34631432545202e-05	0.000804068150208623	8.69262865090403e-05	4.34631432545202e-05	0.000282510431154381	0.000565020862308762	2.17315716272601e-05	0	0	0	0	2.17315716272601e-05	0	6.51947148817803e-05	2.17315716272601e-05	0	0	0	0	0	0	0.0001086578581363	0	4.34631432545202e-05	0	6.51947148817803e-05	0	0	0	8.69262865090403e-05	0.000152121001390821	0	4.34631432545202e-05	6.51947148817803e-05	0	0	k__Fungi;p__Ascomycota
OTU_554	0.0001086578581363	6.51947148817803e-05	8.69262865090403e-05	0.000217315716272601	6.51947148817803e-05	8.69262865090403e-05	6.51947148817803e-05	0.000152121001390821	4.34631432545202e-05	0	0	0	0	0	4.34631432545202e-05	2.17315716272601e-05	0	4.34631432545202e-05	2.17315716272601e-05	0	2.17315716272601e-05	0	4.34631432545202e-05	0	2.17315716272601e-05	4.34631432545202e-05	0.0001086578581363	2.17315716272601e-05	0	2.17315716272601e-05	6.51947148817803e-05	8.69262865090403e-05	0	2.17315716272601e-05	0	4.34631432545202e-05	k__Fungi;p__Basidiomycota;c__unidentified;o__Leucosporidiales;f__Leucosporidiaceae
OTU_556	2.17315716272601e-05	4.34631432545202e-05	4.34631432545202e-05	6.51947148817803e-05	0	0.000260778859527121	4.34631432545202e-05	0.000217315716272601	4.34631432545202e-05	2.17315716272601e-05	6.51947148817803e-05	0	0	0	0	6.51947148817803e-05	0	2.17315716272601e-05	0.0001086578581363	0	0	0	0	4.34631432545202e-05	0	2.17315716272601e-05	4.34631432545202e-05	6.51947148817803e-05	0.000152121001390821	0	2.17315716272601e-05	0.0001086578581363	4.34631432545202e-05	0.000217315716272601	2.17315716272601e-05	0.000608484005563282	k__Fungi;p__unidentified;c__unidentified;o__Mucorales;f__unidentified
OTU_557	4.34631432545202e-05	0	0	0	0	0	0.000695410292072323	0	0	0	8.69262865090403e-05	2.17315716272601e-05	6.51947148817803e-05	0	0	0	0	0	0	0	0	0	0	0	0	0	0	0.000456363004172462	4.34631432545202e-05	0	0	0	0	0	0	0	k__Stramenopiles;p__unidentified
OTU_558	0	0	0	0	2.17315716272601e-05	0	0	0	0	0	0.00110831015299026	0	0	0	0	0.000195584144645341	0.000130389429763561	0	0	0	2.17315716272601e-05	2.17315716272601e-05	0	0	0	0	0	0	0	0	0	0	0	0	0	0	Unclassified
OTU_559	0.000304242002781641	0.0001086578581363	8.69262865090403e-05	0.000239047287899861	0.000130389429763561	0.000173852573018081	4.34631432545202e-05	4.34631432545202e-05	4.34631432545202e-05	0	0.000738873435326843	0	0.000130389429763561	6.51947148817803e-05	0.0001086578581363	0.000239047287899861	6.51947148817803e-05	2.17315716272601e-05	0	4.34631432545202e-05	0	6.51947148817803e-05	0	4.34631432545202e-05	0	6.51947148817803e-05	0.000173852573018081	0.000804068150208623	0.000260778859527121	4.34631432545202e-05	8.69262865090403e-05	0.0001086578581363	0	2.17315716272601e-05	0.000695410292072323	0	k__Chloroplastida;p__Chlorophyta;c__Chlorophyceae;o__unidentified;f__unidentified;g__Chlamydomonas;s__uncultured_Chlorophyta
OTU_561	0	0	0	0.000195584144645341	0	0	0	0	0	0	0	0	0	0	0	0.000195584144645341	0	0	0	0	8.69262865090403e-05	0.000152121001390821	6.51947148817803e-05	8.69262865090403e-05	4.34631432545202e-05	8.69262865090403e-05	0.000304242002781641	0	0	0	0	0.000152121001390821	0	0	0	0	k__Alveolata;p__Apicomplexa;c__Conoidasida;o__Cryptosporida;f__unidentified;g__Cryptosporidium;s__uncultured_alveolate
OTU_562	0	0	0	0	0	0	4.34631432545202e-05	0	0	0	0	2.17315716272601e-05	0	0	0	0	0	0	0	0	0.000195584144645341	0.000782336578581363	4.34631432545202e-05	0	4.34631432545202e-05	4.34631432545202e-05	0	0	0	0	0	0	0	0	0	0	k__Stramenopiles;p__unidentified;c__Chrysophyceae;o__Ochromonadales;f__unidentified;g__Ochromonas
OTU_563	0.000173852573018081	0	6.51947148817803e-05	6.51947148817803e-05	0	0	0	4.34631432545202e-05	6.51947148817803e-05	0	0	0.000956189151599444	0.000173852573018081	2.17315716272601e-05	2.17315716272601e-05	6.51947148817803e-05	0	2.17315716272601e-05	0	2.17315716272601e-05	0	2.17315716272601e-05	4.34631432545202e-05	2.17315716272601e-05	2.17315716272601e-05	0.000173852573018081	0	0	8.69262865090403e-05	0	8.69262865090403e-05	0	0	0	0	0	k__Fungi;p__Basidiomycota;c__Tremellomycetidae;o__Tremellales;f__unidentified;g__Bullera;s__Bullera_miyagiana
OTU_564	0.00117350486787204	0.000369436717663421	0.00113004172461752	0.000825799721835883	0.000543289290681502	0.000391168289290681	0.00243393602225313	0.000239047287899861	0.000260778859527121	0.00369436717663421	0.000695410292072323	0.000434631432545202	0.000956189151599444	0.000412899860917942	0.000412899860917942	0.000630215577190542	0.000456363004172462	0.000282510431154381	4.34631432545202e-05	0	0.000173852573018081	0.000239047287899861	0.000217315716272601	0.000391168289290681	0.000282510431154381	0.000369436717663421	0.000347705146036161	0.000543289290681502	0.00104311543810848	0.000152121001390821	0.000412899860917942	0.000369436717663421	0.000195584144645341	0.000173852573018081	8.69262865090403e-05	4.34631432545202e-05	k__Chloroplastida;p__Chlorophyta;c__Chlorophyceae;o__unidentified;f__unidentified;g__Bracteacoccus;s__Bracteacoccus_sp._KF-2012c
OTU_565	6.51947148817803e-05	6.51947148817803e-05	6.51947148817803e-05	0	6.51947148817803e-05	4.34631432545202e-05	0.000217315716272601	0.000130389429763561	0.000369436717663421	0	0	0	0	0	0	0	0	0	0	0.000130389429763561	0	0	0	0	0	0	0	0	0	0	0	0	0	0	0	0	k__Animalia;p__Rotifera;c__unidentified;o__unidentified;f__Philodinidae;g__unidentified;s__uncultured_bdelloid_rotifer
OTU_566	0	0	0	0	0	0	0	0	0	0	0	0	4.34631432545202e-05	0	0	0	0	0	0	0	8.69262865090403e-05	0.000325973574408901	0.000499826147426982	4.34631432545202e-05	6.51947148817803e-05	4.34631432545202e-05	0	0	0	2.17315716272601e-05	0	0	0	0	0	0	k__Animalia;p__Arthropoda;c__unidentified;o__Collembola;f__unidentified;g__unidentified
OTU_569	8.69262865090403e-05	0.000152121001390821	8.69262865090403e-05	0.000152121001390821	0.0001086578581363	0.0001086578581363	2.17315716272601e-05	2.17315716272601e-05	8.69262865090403e-05	0.000217315716272601	0	0	0	0	0	0	0	0	0	0	0.000347705146036161	0	0	0	0	0	0	0	0	0	0	0	0	0	0	0	k__Fungi;p__Ascomycota;c__Pezizomycetes;o__Pezizales;f__Pyronemataceae
OTU_571	2.17315716272601e-05	0	4.34631432545202e-05	2.17315716272601e-05	2.17315716272601e-05	0.0001086578581363	0	6.51947148817803e-05	0.00128216272600834	0	0	0	0	0	0	0	0	0	0	8.69262865090403e-05	0	0	0	0	0	0	0	0	0	0	0	0	0	0	0	0	k__Fungi;p__Ascomycota
OTU_572	2.17315716272601e-05	6.51947148817803e-05	2.17315716272601e-05	0	0	4.34631432545202e-05	2.17315716272601e-05	0	0	0	0	0	4.34631432545202e-05	0	2.17315716272601e-05	0	2.17315716272601e-05	4.34631432545202e-05	0	0	0	2.17315716272601e-05	0	4.34631432545202e-05	0.000760605006954103	0.000152121001390821	0	0	2.17315716272601e-05	2.17315716272601e-05	0.0001086578581363	0	0	4.34631432545202e-05	0	0.000130389429763561	k__Fungi;p__Ascomycota
OTU_573	4.34631432545202e-05	6.51947148817803e-05	0	0	0	4.34631432545202e-05	4.34631432545202e-05	0	4.34631432545202e-05	4.34631432545202e-05	0	6.51947148817803e-05	2.17315716272601e-05	6.51947148817803e-05	4.34631432545202e-05	0	0	0	0	0	4.34631432545202e-05	0.000152121001390821	0.0001086578581363	0.000695410292072323	0	0	0	0	0	0	0	0	0	0	0	0	k__Stramenopiles;p__unidentified;c__Chrysophyceae;o__Ochromonadales;f__unidentified;g__Ochromonas
OTU_574	0	4.34631432545202e-05	2.17315716272601e-05	6.51947148817803e-05	0	0	0	0	0	0	0	0.000217315716272601	4.34631432545202e-05	0	6.51947148817803e-05	4.34631432545202e-05	6.51947148817803e-05	0	0	2.17315716272601e-05	4.34631432545202e-05	0	2.17315716272601e-05	0	0	0.000152121001390821	2.17315716272601e-05	0	0	6.51947148817803e-05	0.000195584144645341	8.69262865090403e-05	2.17315716272601e-05	6.51947148817803e-05	2.17315716272601e-05	0	k__Fungi;p__Ascomycota;c__Sordariomycetes;o__unidentified;f__unidentified;g__unidentified;s__Conioscypha_japonica
OTU_575	4.34631432545202e-05	4.34631432545202e-05	0.000130389429763561	0	2.17315716272601e-05	0.000586752433936022	4.34631432545202e-05	0	0.00104311543810848	0	0	0	0	0	0	0	0	0	0	6.51947148817803e-05	0	0	0	0	0	2.17315716272601e-05	0	0	0	2.17315716272601e-05	0	0	0	2.17315716272601e-05	0.000325973574408901	0	k__Stramenopiles;p__Diatomea;c__Bacillariophyceae;o__unidentified;f__unidentified;g__Nitzschia;s__Nitzschia_linearis
OTU_576	0.000239047287899861	0.000130389429763561	0.000130389429763561	0.000239047287899861	0.000195584144645341	0.000260778859527121	6.51947148817803e-05	0.0001086578581363	8.69262865090403e-05	0	0.000304242002781641	0	8.69262865090403e-05	0	0	0	0	0	0	0	0	0.000434631432545202	0	0	0	0	0	0	0	0	0	0	0	0	0	0	k__Fungi;p__Chytridiomycota;c__Chytridiomycetes;o__Chytridiales;f__unidentified;g__unidentified
OTU_577	0.000173852573018081	0.000152121001390821	4.34631432545202e-05	2.17315716272601e-05	8.69262865090403e-05	8.69262865090403e-05	0.000543289290681502	0	4.34631432545202e-05	4.34631432545202e-05	0	4.34631432545202e-05	0	0	0	0	0.000130389429763561	0	0	0	0	6.51947148817803e-05	6.51947148817803e-05	4.34631432545202e-05	0.000369436717663421	0	2.17315716272601e-05	4.34631432545202e-05	0.0001086578581363	0	0	0	0	0	0.000152121001390821	2.17315716272601e-05	k__Rhizaria;p__Cercozoa;c__unidentified;o__unidentified;f__Cercomonadidae;g__Cercomonas;s__Cercomonas_sp._HFCC_900
OTU_578	0.000130389429763561	6.51947148817803e-05	8.69262865090403e-05	0.0001086578581363	8.69262865090403e-05	4.34631432545202e-05	0	0	2.17315716272601e-05	0	4.34631432545202e-05	0.0001086578581363	0.000130389429763561	0.0001086578581363	4.34631432545202e-05	6.51947148817803e-05	6.51947148817803e-05	0	0	0	6.51947148817803e-05	8.69262865090403e-05	0.000304242002781641	4.34631432545202e-05	0.000738873435326843	6.51947148817803e-05	4.34631432545202e-05	0	0	2.17315716272601e-05	2.17315716272601e-05	4.34631432545202e-05	0	0	0	2.17315716272601e-05	k__Chloroplastida;p__Streptophyta;c__Embryophyta
OTU_579	0	0	0	0	8.69262865090403e-05	0	0	0	0	0	2.17315716272601e-05	4.34631432545202e-05	6.51947148817803e-05	6.51947148817803e-05	0	4.34631432545202e-05	2.17315716272601e-05	0	0	2.17315716272601e-05	6.51947148817803e-05	8.69262865090403e-05	0	4.34631432545202e-05	0.000434631432545202	4.34631432545202e-05	2.17315716272601e-05	0	2.17315716272601e-05	0	0	0	4.34631432545202e-05	0	0	0	k__Fungi;p__Ascomycota
OTU_580	0	0	2.17315716272601e-05	6.51947148817803e-05	0	0	2.17315716272601e-05	0	0	0	0.000586752433936022	4.34631432545202e-05	8.69262865090403e-05	4.34631432545202e-05	6.51947148817803e-05	0.000239047287899861	4.34631432545202e-05	0	0	4.34631432545202e-05	0	4.34631432545202e-05	2.17315716272601e-05	0	0	0	6.51947148817803e-05	0	0	0	0	0	0	0	0	0	k__Chloroplastida;p__Chlorophyta;c__Chlorophyceae;o__unidentified;f__unidentified;g__Caespitella;s__Caespitella_pascheri
OTU_582	0	0	0	0	2.17315716272601e-05	8.69262865090403e-05	0	0	0	0	0	2.17315716272601e-05	6.51947148817803e-05	6.51947148817803e-05	0.000825799721835883	8.69262865090403e-05	8.69262865090403e-05	6.51947148817803e-05	0	0	0	0	4.34631432545202e-05	0	4.34631432545202e-05	2.17315716272601e-05	6.51947148817803e-05	0	0	0	0	0	0	0	0	2.17315716272601e-05	k__Fungi;p__Basidiomycota;c__Agaricomycetes;o__Hymenochaetales;f__Hymenochaetaceae;g__Hydnochaete;s__Hydnochaete_duportii
OTU_583	2.17315716272601e-05	0.000195584144645341	8.69262865090403e-05	6.51947148817803e-05	2.17315716272601e-05	0.000152121001390821	0.000152121001390821	0	0	4.34631432545202e-05	8.69262865090403e-05	6.51947148817803e-05	8.69262865090403e-05	0.000239047287899861	0.000304242002781641	0.000152121001390821	6.51947148817803e-05	0.0001086578581363	6.51947148817803e-05	6.51947148817803e-05	0.000130389429763561	0.000130389429763561	0.000456363004172462	8.69262865090403e-05	0.000738873435326843	0.0001086578581363	6.51947148817803e-05	0	0	0.000152121001390821	4.34631432545202e-05	2.17315716272601e-05	2.17315716272601e-05	0.0001086578581363	8.69262865090403e-05	4.34631432545202e-05	k__Fungi;p__Basidiomycota;c__Agaricomycetes
OTU_584	8.69262865090403e-05	0.0001086578581363	0.0001086578581363	4.34631432545202e-05	0.000195584144645341	0.000195584144645341	2.17315716272601e-05	4.34631432545202e-05	0	0	0	0	0	0.0001086578581363	2.17315716272601e-05	0	0	4.34631432545202e-05	0	0	6.51947148817803e-05	0.000130389429763561	0.000195584144645341	2.17315716272601e-05	0.0001086578581363	6.51947148817803e-05	2.17315716272601e-05	0	0	4.34631432545202e-05	6.51947148817803e-05	0	4.34631432545202e-05	6.51947148817803e-05	6.51947148817803e-05	0	k__Fungi;p__Basidiomycota;c__Agaricomycetes;o__Agaricales;f__Physalacriaceae;g__Flammulina;s__Flammulina_velutipes
OTU_585	2.17315716272601e-05	2.17315716272601e-05	2.17315716272601e-05	0	0.000239047287899861	0	2.17315716272601e-05	0	0	8.69262865090403e-05	6.51947148817803e-05	0	8.69262865090403e-05	8.69262865090403e-05	4.34631432545202e-05	2.17315716272601e-05	6.51947148817803e-05	6.51947148817803e-05	4.34631432545202e-05	6.51947148817803e-05	0.000152121001390821	0.000304242002781641	0.000239047287899861	0.00195584144645341	0.000456363004172462	0.000260778859527121	0.0001086578581363	0	0	0	2.17315716272601e-05	2.17315716272601e-05	8.69262865090403e-05	4.34631432545202e-05	0	0	k__Fungi;p__Ascomycota;c__Dothideomycetes
OTU_587	4.34631432545202e-05	6.51947148817803e-05	0.000239047287899861	0	6.51947148817803e-05	0	2.17315716272601e-05	2.17315716272601e-05	0	0	0	0	4.34631432545202e-05	0	4.34631432545202e-05	0	0	0	0	0	2.17315716272601e-05	2.17315716272601e-05	4.34631432545202e-05	0	0.000152121001390821	0.000130389429763561	0	0	0	0	0	0	0	0	0	0	k__Chloroplastida;p__Streptophyta;c__Embryophyta;o__Dicranales;f__unidentified;g__Leucobryum;s__Leucobryum_albidum
OTU_588	0.000260778859527121	0	0	0	0	0	0	2.17315716272601e-05	0	0	0	0	0.000239047287899861	0	0	0	0	0	2.17315716272601e-05	0	0	4.34631432545202e-05	2.17315716272601e-05	4.34631432545202e-05	4.34631432545202e-05	0	0	0	6.51947148817803e-05	0	0	0	0	0	0	0	k__Stramenopiles;p__Peronosporomycetes;c__unidentified;o__unidentified;f__unidentified;g__Phytophthora;s__Plasmopara_viticola
OTU_589	0	0	0	4.34631432545202e-05	0	0.000130389429763561	4.34631432545202e-05	8.69262865090403e-05	0	0	0.0001086578581363	0	0	0	0	2.17315716272601e-05	0	0	0	0	0	4.34631432545202e-05	6.51947148817803e-05	0.000999652294853964	0	6.51947148817803e-05	0	0	2.17315716272601e-05	0	0	0	0	0	0	0	k__Rhizaria;p__Cercozoa;c__unidentified;o__unidentified;f__Cercomonadidae;g__Cercomonas
OTU_590	8.69262865090403e-05	0	0	0	0	0	0	0	0	2.17315716272601e-05	0	0	8.69262865090403e-05	0	0	0	0	0	0	0	8.69262865090403e-05	4.34631432545202e-05	0	0.000217315716272601	0	0	0	0	8.69262865090403e-05	0	0	0	0	0	0	0	k__Alveolata;p__Apicomplexa;c__Gregarinasina;o__Eugregarinorida;f__unidentified;g__Amoebogregarina;s__Amoebogregarina_nigra
OTU_591	0	0	4.34631432545202e-05	0	0	0	0	2.17315716272601e-05	0	0	2.17315716272601e-05	0	0	0	0	6.51947148817803e-05	6.51947148817803e-05	0	2.17315716272601e-05	0	0	0	0	0	6.51947148817803e-05	8.69262865090403e-05	0	0	0	0.0001086578581363	0	0	0	0	0	0.00132562586926287	k__Chloroplastida;p__Chlorophyta;c__Trebouxiophyceae;o__unidentified;f__unidentified;g__Xylochloris;s__Xylochloris_irregularis
OTU_592	0	0	2.17315716272601e-05	4.34631432545202e-05	4.34631432545202e-05	0	0	0	0	2.17315716272601e-05	0	0.0001086578581363	0	4.34631432545202e-05	2.17315716272601e-05	2.17315716272601e-05	4.34631432545202e-05	2.17315716272601e-05	0	0	4.34631432545202e-05	2.17315716272601e-05	2.17315716272601e-05	0.000217315716272601	0.000325973574408901	8.69262865090403e-05	2.17315716272601e-05	0	0	0	6.51947148817803e-05	0	0.000152121001390821	0	0	0	k__Fungi;p__Basidiomycota;c__Tremellomycetidae;o__Tremellales;f__unidentified
OTU_595	0	0	0	0	6.51947148817803e-05	8.69262865090403e-05	0	0	0	0	0	0	0	0	0	0	6.51947148817803e-05	0.0001086578581363	0	0	4.34631432545202e-05	0	4.34631432545202e-05	6.51947148817803e-05	6.51947148817803e-05	8.69262865090403e-05	0.000130389429763561	0	0	0	0	0	2.17315716272601e-05	0.000152121001390821	2.17315716272601e-05	0	k__Fungi;p__Basidiomycota;c__Agaricomycetes;o__Sebacinales;f__Sebacinaceae;g__Sebacina
OTU_596	2.17315716272601e-05	0	6.51947148817803e-05	4.34631432545202e-05	0	0	2.17315716272601e-05	0	2.17315716272601e-05	0.000543289290681502	4.34631432545202e-05	0.000130389429763561	0	0	4.34631432545202e-05	6.51947148817803e-05	0	6.51947148817803e-05	0	0	2.17315716272601e-05	0	0	4.34631432545202e-05	0	2.17315716272601e-05	0	0	2.17315716272601e-05	0	0	0	0	0	6.51947148817803e-05	0	k__Fungi;p__Basidiomycota;c__unidentified;o__Sporidiobolaceae;f__unidentified;g__Sporidiobolus;s__Sporidiobolus_pararoseus
OTU_597	0	0	0	0	0	0	4.34631432545202e-05	2.17315716272601e-05	0	0	0	0.000130389429763561	0	0	0	4.34631432545202e-05	2.17315716272601e-05	0	0	0	2.17315716272601e-05	6.51947148817803e-05	8.69262865090403e-05	2.17315716272601e-05	0.000239047287899861	0	0	0	0	0	0	0	0	0	0	0.000173852573018081	k__Rhizaria;p__Cercozoa;c__unidentified;o__Glissomonadida;f__unidentified;g__Heteromita
OTU_598	0	0	2.17315716272601e-05	0	0	0	0	0	0	0.000152121001390821	0	8.69262865090403e-05	4.34631432545202e-05	0.000152121001390821	0.000847531293463143	4.34631432545202e-05	2.17315716272601e-05	0	0	0	0	0	0	0	2.17315716272601e-05	0	0	0	2.17315716272601e-05	0	0	0	0	0	0	0	k__Rhizaria;p__Cercozoa;c__Thecofilosea
OTU_599	0.000173852573018081	0	0	0	0	0	0	0	0	0	0	0	0.000369436717663421	0	0	0	0	0	0	0	0	0	0	0.000173852573018081	0	0	0	0	0.000130389429763561	0	0	0	0	0	0	0	k__Fungi;p__Ascomycota;c__Eurotiomycetes;o__Onygenales;f__Onygenaceae;g__Coccidioides;s__unidentified
OTU_603	0	0	0	0	0.0001086578581363	0	0	0	4.34631432545202e-05	0	0	0.000999652294853964	0	0	0	0	0	0	0	0	6.51947148817803e-05	0	0.000195584144645341	0	0	0	0	4.34631432545202e-05	0	0	0	0	0	0	0	0	k__Animalia;p__Tardigrada;c__unidentified;o__unidentified;f__Hypsibiidae;g__unidentified;s__Isohypsibius_prosostomus
OTU_604	0	0	0	2.17315716272601e-05	6.51947148817803e-05	0	4.34631432545202e-05	0	0	0	0	0	0	8.69262865090403e-05	0	0	8.69262865090403e-05	0	0	0	0	0.000130389429763561	4.34631432545202e-05	4.34631432545202e-05	0.000152121001390821	8.69262865090403e-05	4.34631432545202e-05	0	0	0	0	0	2.17315716272601e-05	0	0	0	Unclassified
OTU_606	0	0	0	0	0	0	0	2.17315716272601e-05	0	0	0	8.69262865090403e-05	6.51947148817803e-05	0	0.00102138386648122	0	0	2.17315716272601e-05	0.000217315716272601	0	0	8.69262865090403e-05	0.000195584144645341	0	6.51947148817803e-05	8.69262865090403e-05	0	0	0	0	0	0	0	0	0	0	k__Fungi;p__Basidiomycota;c__Agaricostilbomycetes;o__Agaricostilbales;f__Agaricostilbaceae
OTU_608	6.51947148817803e-05	0	0.000130389429763561	8.69262865090403e-05	2.17315716272601e-05	2.17315716272601e-05	0.000217315716272601	2.17315716272601e-05	4.34631432545202e-05	0.000804068150208623	0	4.34631432545202e-05	2.17315716272601e-05	4.34631432545202e-05	0	0	4.34631432545202e-05	0	0	4.34631432545202e-05	2.17315716272601e-05	6.51947148817803e-05	4.34631432545202e-05	0	0	0	4.34631432545202e-05	4.34631432545202e-05	2.17315716272601e-05	0	4.34631432545202e-05	0	0	0	0	0.000717141863699583	k__Chloroplastida;p__Chlorophyta;c__Chlorophyceae;o__unidentified;f__unidentified;g__Chlamydomonas;s__Chlorococcum_hypnosporum
OTU_610	8.69262865090403e-05	6.51947148817803e-05	4.34631432545202e-05	6.51947148817803e-05	6.51947148817803e-05	0.000195584144645341	0.000152121001390821	0.000173852573018081	6.51947148817803e-05	0	2.17315716272601e-05	0.000391168289290681	0	0	0	6.51947148817803e-05	0	0	2.17315716272601e-05	0	0	4.34631432545202e-05	8.69262865090403e-05	0	0	0	0	0.000217315716272601	0	0	0	0	0	0	0	0	k__Rhizaria;p__Cercozoa;c__unidentified
OTU_611	8.69262865090403e-05	0.0001086578581363	0.000173852573018081	6.51947148817803e-05	4.34631432545202e-05	6.51947148817803e-05	0.000152121001390821	2.17315716272601e-05	6.51947148817803e-05	8.69262865090403e-05	6.51947148817803e-05	0.000173852573018081	6.51947148817803e-05	0	0	6.51947148817803e-05	4.34631432545202e-05	4.34631432545202e-05	0.000130389429763561	2.17315716272601e-05	2.17315716272601e-05	0.000195584144645341	0	2.17315716272601e-05	4.34631432545202e-05	6.51947148817803e-05	2.17315716272601e-05	8.69262865090403e-05	6.51947148817803e-05	2.17315716272601e-05	2.17315716272601e-05	0	0	2.17315716272601e-05	8.69262865090403e-05	0	k__Rhizaria;p__Cercozoa;c__unidentified
OTU_613	0	0	0	0	0	2.17315716272601e-05	0	0	0	4.34631432545202e-05	0	0.000369436717663421	0	0	2.17315716272601e-05	4.34631432545202e-05	0	0	0	0	2.17315716272601e-05	6.51947148817803e-05	4.34631432545202e-05	4.34631432545202e-05	4.34631432545202e-05	0	0	0	0	0	4.34631432545202e-05	0	0	0	0	0.000999652294853964	k__Fungi;p__Basidiomycota;c__Tremellomycetidae;o__Tremellales;f__unidentified;g__Bullera;s__Bullera_miyagiana
OTU_614	6.51947148817803e-05	6.51947148817803e-05	0.000130389429763561	6.51947148817803e-05	4.34631432545202e-05	8.69262865090403e-05	0	0.00134735744089013	0	0	0	0	0	6.51947148817803e-05	0	4.34631432545202e-05	0	4.34631432545202e-05	0	0	0	0	4.34631432545202e-05	0	2.17315716272601e-05	2.17315716272601e-05	4.34631432545202e-05	0	6.51947148817803e-05	4.34631432545202e-05	2.17315716272601e-05	0	0	0	0	0	k__Chloroplastida;p__Chlorophyta;c__Chlorophyceae;o__unidentified;f__unidentified;g__Chloromonas;s__Chloromonas_augustae
OTU_615	0.000130389429763561	0.000173852573018081	0.000130389429763561	0.0001086578581363	0.0001086578581363	0.000152121001390821	0.000304242002781641	0.0001086578581363	0.000586752433936022	0	0	0	0	0	0	0	0	0	0	0.000152121001390821	0	0	0	0	0	0	0	0	0	0	0	0	0	0	2.17315716272601e-05	0	k__Fungi;p__Chytridiomycota;c__unidentified;o__unidentified;f__unidentified;g__Olpidium
OTU_616	6.51947148817803e-05	2.17315716272601e-05	4.34631432545202e-05	8.69262865090403e-05	2.17315716272601e-05	4.34631432545202e-05	4.34631432545202e-05	4.34631432545202e-05	0.00121696801112656	4.34631432545202e-05	0	0	2.17315716272601e-05	0	0	0	0	0	2.17315716272601e-05	2.17315716272601e-05	0	0	0	0	6.51947148817803e-05	0	0	0	2.17315716272601e-05	0	2.17315716272601e-05	0	0	0	0	6.51947148817803e-05	k__Eukaryota;p__LKM15;c__unidentified;o__unidentified;f__unidentified;g__unidentified;s__uncultured_fungus
OTU_617	0.000195584144645341	0.000304242002781641	0.000434631432545202	0.000325973574408901	0.000282510431154381	0.000412899860917942	0.000217315716272601	0.000195584144645341	0.0001086578581363	0	0	0.000412899860917942	0	0	0	0	0	0	0	0	0	0	0.000760605006954103	0	0	0	0	0.000499826147426982	0	0	0	0	0	0	0	0	k__Fungi
OTU_618	0.000195584144645341	6.51947148817803e-05	0.000130389429763561	0.000152121001390821	2.17315716272601e-05	8.69262865090403e-05	2.17315716272601e-05	0.000738873435326843	0	0.0001086578581363	0.00132562586926287	8.69262865090403e-05	0.000173852573018081	6.51947148817803e-05	4.34631432545202e-05	0.000543289290681502	4.34631432545202e-05	8.69262865090403e-05	0	0.000130389429763561	0.000173852573018081	4.34631432545202e-05	0	8.69262865090403e-05	4.34631432545202e-05	6.51947148817803e-05	0.000152121001390821	8.69262865090403e-05	0.000195584144645341	8.69262865090403e-05	6.51947148817803e-05	0.000152121001390821	6.51947148817803e-05	8.69262865090403e-05	0.000152121001390821	0.000282510431154381	k__Fungi;p__Ascomycota;c__Sordariomycetes;o__Sordariales
OTU_619	0	0	0	6.51947148817803e-05	2.17315716272601e-05	0	0	0	0	0	0	0	0.000130389429763561	8.69262865090403e-05	0	6.51947148817803e-05	0	4.34631432545202e-05	0	0	2.17315716272601e-05	0	0.0001086578581363	6.51947148817803e-05	0.000543289290681502	0.000478094575799722	6.51947148817803e-05	0	0	0	2.17315716272601e-05	0	0	0	0	0	k__Fungi;p__Ascomycota;c__Dothideomycetes;o__Dothideales;f__unidentified;g__Heleiosa;s__Heleiosa_barbatula
OTU_620	6.51947148817803e-05	2.17315716272601e-05	6.51947148817803e-05	2.17315716272601e-05	0.0001086578581363	8.69262865090403e-05	2.17315716272601e-05	0	0	0	0	0	6.51947148817803e-05	0	0	0	6.51947148817803e-05	0	0	0	0	0	0	0	0	2.17315716272601e-05	4.34631432545202e-05	0	2.17315716272601e-05	0	0	0	0.0001086578581363	0	0.000543289290681502	0	k__Chloroplastida;p__Chlorophyta;c__Trebouxiophyceae;o__unidentified;f__unidentified;g__unidentified;s__Chlorella_sp._BC4-VF9
OTU_621	0	0	0	0	2.17315716272601e-05	0	0	0	0	4.34631432545202e-05	0	0	0	0	0	0	0	0	0	0	0	0.000673678720445063	0.0001086578581363	0.000304242002781641	0.0001086578581363	0	0	0	0	0	0	0	0	0	0	0	k__Animalia;p__Nematoda;c__Chromadorea;o__unidentified;f__Rhabditidae;g__unidentified
OTU_623	0	0	0	0	0	0	2.17315716272601e-05	4.34631432545202e-05	0	0	4.34631432545202e-05	0.000130389429763561	0	0	0	0	0	2.17315716272601e-05	4.34631432545202e-05	0	0	0	8.69262865090403e-05	0	0	0	0	0.000152121001390821	0	2.17315716272601e-05	4.34631432545202e-05	0.0001086578581363	0	2.17315716272601e-05	8.69262865090403e-05	0.000651947148817803	k__Fungi;p__Basidiomycota;c__Agaricostilbomycetes;o__Agaricostilbales;f__unidentified;g__Sporobolomyces
OTU_624	0	0.000173852573018081	2.17315716272601e-05	2.17315716272601e-05	0	2.17315716272601e-05	0.0001086578581363	0.000195584144645341	0.0001086578581363	2.17315716272601e-05	0	0	0	0.0001086578581363	0	0	0	2.17315716272601e-05	0.0001086578581363	0	2.17315716272601e-05	0.000173852573018081	8.69262865090403e-05	8.69262865090403e-05	0.000347705146036161	6.51947148817803e-05	0.000152121001390821	0	0	0.000130389429763561	0	0	0	0	0	4.34631432545202e-05	Unclassified
OTU_625	4.34631432545202e-05	8.69262865090403e-05	0	0	0.000173852573018081	6.51947148817803e-05	0	6.51947148817803e-05	0	0.0001086578581363	4.34631432545202e-05	0	2.17315716272601e-05	6.51947148817803e-05	0	0	0.0001086578581363	0	0	0	0	0	0	0	2.17315716272601e-05	0	0	0.0001086578581363	2.17315716272601e-05	0	6.51947148817803e-05	0	0.000782336578581363	0	0	0	k__Rhizaria;p__Cercozoa;c__Thecofilosea;o__Cryomonadida;f__Rhizaspididae;g__Rhogostoma;s__uncultured_eukaryote
OTU_626	0	0	4.34631432545202e-05	6.51947148817803e-05	2.17315716272601e-05	0	0	0	0	0	4.34631432545202e-05	0	0.000152121001390821	4.34631432545202e-05	6.51947148817803e-05	0.000782336578581363	2.17315716272601e-05	4.34631432545202e-05	0	4.34631432545202e-05	0	0	0	0	2.17315716272601e-05	0	6.51947148817803e-05	2.17315716272601e-05	0	0	0	8.69262865090403e-05	2.17315716272601e-05	0	0	0	k__Fungi;p__Ascomycota
OTU_627	2.17315716272601e-05	0	2.17315716272601e-05	0	0.0001086578581363	0	0.000217315716272601	0	0	0	0.000239047287899861	6.51947148817803e-05	2.17315716272601e-05	4.34631432545202e-05	0	2.17315716272601e-05	0	0	6.51947148817803e-05	0	4.34631432545202e-05	6.51947148817803e-05	0	0	2.17315716272601e-05	2.17315716272601e-05	0	4.34631432545202e-05	2.17315716272601e-05	0	2.17315716272601e-05	0	0	0	0	0	k__Fungi;p__Basidiomycota;c__Agaricostilbomycetes;o__Agaricostilbales;f__unidentified;g__Sporobolomyces;s__uncultured_Boletaceae
OTU_628	4.34631432545202e-05	0	4.34631432545202e-05	0	0	0	0	0	0	0.000391168289290681	0.0001086578581363	4.34631432545202e-05	0.0001086578581363	0	0.000630215577190542	0.000152121001390821	6.51947148817803e-05	2.17315716272601e-05	0	6.51947148817803e-05	8.69262865090403e-05	2.17315716272601e-05	0.0001086578581363	8.69262865090403e-05	4.34631432545202e-05	0.000130389429763561	0	0.000152121001390821	8.69262865090403e-05	6.51947148817803e-05	0.000130389429763561	6.51947148817803e-05	0	4.34631432545202e-05	4.34631432545202e-05	0	k__Amoebozoa;p__Schizoplasmodiida;c__unidentified;o__unidentified;f__unidentified;g__Schizoplasmodium;s__Schizoplasmodium_cavostelioides
OTU_629	0	0	0	2.17315716272601e-05	2.17315716272601e-05	2.17315716272601e-05	0.000369436717663421	4.34631432545202e-05	2.17315716272601e-05	4.34631432545202e-05	0.000173852573018081	0.0001086578581363	0	0	0	0	0	0	2.17315716272601e-05	2.17315716272601e-05	8.69262865090403e-05	0.000804068150208623	0.000543289290681502	0.000130389429763561	0.000130389429763561	0.0001086578581363	0.0001086578581363	0.000195584144645341	0.0001086578581363	8.69262865090403e-05	0	4.34631432545202e-05	0.0001086578581363	2.17315716272601e-05	0.000173852573018081	6.51947148817803e-05	k__Alveolata;p__Apicomplexa;c__Gregarinasina;o__Eugregarinorida;f__unidentified;g__Gregarina
OTU_631	0.000195584144645341	0	0	0	0	0	0	0	0	4.34631432545202e-05	0	2.17315716272601e-05	0.000586752433936022	6.51947148817803e-05	4.34631432545202e-05	6.51947148817803e-05	2.17315716272601e-05	6.51947148817803e-05	2.17315716272601e-05	0	0	0	0	6.51947148817803e-05	0	0	0	0	6.51947148817803e-05	4.34631432545202e-05	0	2.17315716272601e-05	0	0	0	0	k__Chloroplastida;p__Phragmoplastophyta;c__unidentified;o__Zygnematales;f__unidentified;g__Mougeotia;s__Mougeotia_sp._SVCK_193
OTU_632	0	0	0	0.000173852573018081	2.17315716272601e-05	0	0	0	0	0	0	8.69262865090403e-05	4.34631432545202e-05	6.51947148817803e-05	2.17315716272601e-05	0.000738873435326843	4.34631432545202e-05	0	2.17315716272601e-05	0	0	0	0	0	0	0	6.51947148817803e-05	0	0	0	0	2.17315716272601e-05	0	0	0	0	k__Fungi;p__Chytridiomycota;c__Chytridiomycetes;o__Chytridiales;f__unidentified
OTU_633	0	2.17315716272601e-05	0	0	0	0	0	0	4.34631432545202e-05	0	0.000130389429763561	0.0001086578581363	2.17315716272601e-05	0.000152121001390821	0	0	0	0	0	4.34631432545202e-05	0	4.34631432545202e-05	0	0	2.17315716272601e-05	0	0	0	0	4.34631432545202e-05	0	4.34631432545202e-05	0	0	0.000499826147426982	0	k__Fungi;p__Ascomycota;c__Lecanoromycetes;o__unidentified;f__unidentified;g__unidentified
OTU_634	4.34631432545202e-05	4.34631432545202e-05	0	2.17315716272601e-05	0	6.51947148817803e-05	0.001086578581363	0	0	0	0	2.17315716272601e-05	0	0	0	0	0	0	0	0	6.51947148817803e-05	0	0	0	0	0	0	0	2.17315716272601e-05	0	0	0	0	2.17315716272601e-05	0	0	k__Fungi;p__Chytridiomycota;c__Chytridiomycetes;o__Spizellomycetales;f__unidentified;g__Powellomyces;s__uncultured_Chytridiomycota
OTU_635	0	0	0	0	0	0	6.51947148817803e-05	0.000434631432545202	4.34631432545202e-05	0	0	4.34631432545202e-05	0	0	0	0	0	0	0	0	0	4.34631432545202e-05	0	2.17315716272601e-05	4.34631432545202e-05	8.69262865090403e-05	0.000478094575799722	0	4.34631432545202e-05	0	0	0	0	0	4.34631432545202e-05	0	k__Animalia;p__Nematoda;c__Chromadorea;o__unidentified;f__Plectidae;g__unidentified;s__unidentified
OTU_636	0.000152121001390821	0	0	0	0	0	0	0	0	2.17315716272601e-05	2.17315716272601e-05	2.17315716272601e-05	0.000304242002781641	0	0	0	0	0	0	0	0	0	0	6.51947148817803e-05	0	0	0	0	0.000173852573018081	0	0	0	0	2.17315716272601e-05	0	0	k__Animalia;p__Arthropoda;c__Arachnida;o__unidentified;f__unidentified;g__unidentified;s__Oribatula_tibialis
OTU_637	2.17315716272601e-05	6.51947148817803e-05	4.34631432545202e-05	8.69262865090403e-05	4.34631432545202e-05	4.34631432545202e-05	6.51947148817803e-05	0	0	0	4.34631432545202e-05	8.69262865090403e-05	2.17315716272601e-05	4.34631432545202e-05	8.69262865090403e-05	0.0001086578581363	6.51947148817803e-05	0	0	2.17315716272601e-05	0	4.34631432545202e-05	0	0	2.17315716272601e-05	6.51947148817803e-05	4.34631432545202e-05	0	8.69262865090403e-05	2.17315716272601e-05	0	0.0001086578581363	2.17315716272601e-05	2.17315716272601e-05	6.51947148817803e-05	0	k__Fungi;p__Ascomycota;c__Saccharomycetes;o__Saccharomycetales;f__unidentified;g__Candida;s__Candida_austromarina
OTU_638	0.000152121001390821	0	8.69262865090403e-05	2.17315716272601e-05	6.51947148817803e-05	0.0001086578581363	6.51947148817803e-05	6.51947148817803e-05	4.34631432545202e-05	0	2.17315716272601e-05	0	0	0	0	0	0	0	0	0	0	0	6.51947148817803e-05	0	0	0	0	0	8.69262865090403e-05	0	2.17315716272601e-05	2.17315716272601e-05	4.34631432545202e-05	0	0	6.51947148817803e-05	k__Fungi;p__Basidiomycota;c__Tremellomycetidae;o__Cystofilobasidiales;f__Cystofilobasidiaceae;g__Guehomyces;s__Guehomyces_pullulans
OTU_640	0	6.51947148817803e-05	0	2.17315716272601e-05	0	0	0	0	0	0	8.69262865090403e-05	0.000478094575799722	0	0.000260778859527121	0	0	0	0	2.17315716272601e-05	0	0	0.0001086578581363	2.17315716272601e-05	0	6.51947148817803e-05	0	0	0	0.000152121001390821	0	0	2.17315716272601e-05	0	0	0.000282510431154381	0	k__Fungi;p__Basidiomycota;c__Agaricostilbomycetes;o__Agaricostilbales;f__Chionosphaeraceae
OTU_642	6.51947148817803e-05	4.34631432545202e-05	0	0	0	0	2.17315716272601e-05	0	0	0	2.17315716272601e-05	0	6.51947148817803e-05	4.34631432545202e-05	0	4.34631432545202e-05	0	0	0	0	2.17315716272601e-05	2.17315716272601e-05	8.69262865090403e-05	0.000173852573018081	6.51947148817803e-05	0	6.51947148817803e-05	2.17315716272601e-05	6.51947148817803e-05	2.17315716272601e-05	0	0	0	0	0	2.17315716272601e-05	k__Fungi;p__Basidiomycota;c__unidentified;o__Pucciniales
OTU_643	0	0	0	4.34631432545202e-05	0	0	0	0	0	0	0	0	0	4.34631432545202e-05	0	0	0	0	0	0	6.51947148817803e-05	6.51947148817803e-05	6.51947148817803e-05	2.17315716272601e-05	0.000782336578581363	4.34631432545202e-05	6.51947148817803e-05	0	0	0	0	4.34631432545202e-05	0	0	0	0	k__Fungi;p__Ascomycota
OTU_644	0.000260778859527121	0.000130389429763561	4.34631432545202e-05	0.0001086578581363	8.69262865090403e-05	0.000152121001390821	6.51947148817803e-05	0	6.51947148817803e-05	0	4.34631432545202e-05	8.69262865090403e-05	6.51947148817803e-05	8.69262865090403e-05	0	0	6.51947148817803e-05	2.17315716272601e-05	2.17315716272601e-05	0	4.34631432545202e-05	2.17315716272601e-05	0	0	2.17315716272601e-05	0	2.17315716272601e-05	0	4.34631432545202e-05	0.0001086578581363	6.51947148817803e-05	0	0	8.69262865090403e-05	0	0	k__Fungi
OTU_645	0	0	0	0	4.34631432545202e-05	0	0	0	0	0	0	2.17315716272601e-05	2.17315716272601e-05	2.17315716272601e-05	2.17315716272601e-05	0.000195584144645341	0.000239047287899861	0	0	6.51947148817803e-05	4.34631432545202e-05	0	0.000130389429763561	0	6.51947148817803e-05	0	2.17315716272601e-05	0	0	0	0	4.34631432545202e-05	2.17315716272601e-05	0	0	0	k__Animalia;p__Annelida;c__unidentified;o__unidentified;f__Enchytraeidae;g__unidentified
OTU_646	0.000282510431154381	0.000499826147426982	0.000391168289290681	0.00143428372739917	0.000325973574408901	0.000217315716272601	6.51947148817803e-05	4.34631432545202e-05	0.000825799721835883	0.000391168289290681	0.000695410292072323	0.0001086578581363	0.000239047287899861	0.0001086578581363	0.000152121001390821	0.00126043115438108	8.69262865090403e-05	8.69262865090403e-05	0.000130389429763561	0.0001086578581363	6.51947148817803e-05	0.0001086578581363	8.69262865090403e-05	0.0001086578581363	0.000412899860917942	0.000434631432545202	0.00123869958275382	0.000717141863699583	0.000847531293463143	0.000434631432545202	0.000478094575799722	0.00410726703755216	0.000521557719054242	0.000695410292072323	0.000195584144645341	0.00230354659248957	k__Fungi;p__Ascomycota;c__Leotiomycetes;o__Thelebolales;f__Thelebolaceae;g__Thelebolus;s__Thelebolus_stercoreus
OTU_648	0	4.34631432545202e-05	0	4.34631432545202e-05	2.17315716272601e-05	2.17315716272601e-05	8.69262865090403e-05	0	8.69262865090403e-05	4.34631432545202e-05	4.34631432545202e-05	0.000130389429763561	0	4.34631432545202e-05	4.34631432545202e-05	8.69262865090403e-05	4.34631432545202e-05	6.51947148817803e-05	6.51947148817803e-05	6.51947148817803e-05	0.000130389429763561	0.000195584144645341	0.000260778859527121	8.69262865090403e-05	0.000130389429763561	0.000130389429763561	0.000130389429763561	6.51947148817803e-05	0	0	0	4.34631432545202e-05	0	0	0	2.17315716272601e-05	k__Animalia;p__Arthropoda;c__Arachnida;o__unidentified;f__unidentified;g__unidentified
OTU_649	6.51947148817803e-05	2.17315716272601e-05	0	6.51947148817803e-05	0	8.69262865090403e-05	0	0.000304242002781641	0	0	0	0.000130389429763561	0	0	6.51947148817803e-05	0	0	2.17315716272601e-05	0	0	2.17315716272601e-05	4.34631432545202e-05	2.17315716272601e-05	2.17315716272601e-05	0	0	6.51947148817803e-05	0	6.51947148817803e-05	0	0	0	0	4.34631432545202e-05	2.17315716272601e-05	0	k__Fungi;p__Basidiomycota;c__Agaricomycetes
OTU_651	4.34631432545202e-05	4.34631432545202e-05	2.17315716272601e-05	0	0	4.34631432545202e-05	0.00110831015299026	0.000217315716272601	0.000738873435326843	0	0	2.17315716272601e-05	2.17315716272601e-05	6.51947148817803e-05	0	6.51947148817803e-05	2.17315716272601e-05	0	2.17315716272601e-05	4.34631432545202e-05	2.17315716272601e-05	4.34631432545202e-05	2.17315716272601e-05	0	0	0	0	2.17315716272601e-05	0	0	0	2.17315716272601e-05	0	0	0	0	k__Fungi;p__Ascomycota;c__Dothideomycetes;o__Capnodiales;f__Mycosphaerellaceae;g__unidentified;s__ascomycete_sp._He1C
OTU_652	0	0	0	0	0	0	0	0	0	0	0	0.000391168289290681	0	0	0	0	0	0	0	0	0.0001086578581363	0.000347705146036161	0.000282510431154381	4.34631432545202e-05	4.34631432545202e-05	0.0001086578581363	4.34631432545202e-05	6.51947148817803e-05	0	0	0	0	0	0	0	0	k__Stramenopiles;p__unidentified;c__Chrysophyceae;o__Chromulinales;f__unidentified;g__Oikomonas;s__Oikomonas_mutabilis
OTU_655	0.000499826147426982	0.000717141863699583	0.0001086578581363	0.0001086578581363	8.69262865090403e-05	0.000391168289290681	6.51947148817803e-05	6.51947148817803e-05	4.34631432545202e-05	0	0.000760605006954103	0	0.000304242002781641	0.000130389429763561	4.34631432545202e-05	0.000152121001390821	0	0	0	0	8.69262865090403e-05	4.34631432545202e-05	2.17315716272601e-05	4.34631432545202e-05	2.17315716272601e-05	2.17315716272601e-05	2.17315716272601e-05	4.34631432545202e-05	0.000282510431154381	2.17315716272601e-05	6.51947148817803e-05	0	0	0	0	0	k__Stramenopiles;p__Diatomea;c__Bacillariophyceae;o__unidentified;f__unidentified;g__Fistulifera;s__unidentified
OTU_656	8.69262865090403e-05	4.34631432545202e-05	0.0001086578581363	0.0001086578581363	0.0001086578581363	2.17315716272601e-05	2.17315716272601e-05	0	6.51947148817803e-05	0.000217315716272601	0	0	0	0	0	0	0	0	0	0	0.000152121001390821	0	0	0	0	0	0	0	0	0	0	0	2.17315716272601e-05	0	0.000130389429763561	0	k__Fungi;p__Basidiomycota
OTU_657	0	0	0	0	0	0.000130389429763561	0	0	2.17315716272601e-05	0	0	0	0	0	0	0	0	2.17315716272601e-05	2.17315716272601e-05	0	2.17315716272601e-05	8.69262865090403e-05	6.51947148817803e-05	0	0.000173852573018081	2.17315716272601e-05	2.17315716272601e-05	2.17315716272601e-05	2.17315716272601e-05	2.17315716272601e-05	0	0.0001086578581363	2.17315716272601e-05	4.34631432545202e-05	0	0	k__Fungi;p__Ascomycota;c__Dothideomycetes;o__Capnodiales;f__Mycosphaerellaceae;g__unidentified;s__Troposporella_fumosa
OTU_658	4.34631432545202e-05	0	0	0	0	0	4.34631432545202e-05	0	0	0	0	8.69262865090403e-05	6.51947148817803e-05	0	0	0	0	2.17315716272601e-05	0	0	0.0001086578581363	0.0001086578581363	0.000239047287899861	0	4.34631432545202e-05	6.51947148817803e-05	8.69262865090403e-05	2.17315716272601e-05	0	0	0	0	0	0	2.17315716272601e-05	0	k__Animalia;p__Arthropoda;c__unidentified;o__Collembola;f__unidentified;g__unidentified;s__Sminthurinus_bimaculatus
OTU_659	4.34631432545202e-05	0	0	0	0.000412899860917942	0.000260778859527121	0	0	0	0	0	0	0	0	0	0	0.000130389429763561	0	2.17315716272601e-05	0	0	0	0	0	0	0	0	0	0	0	0	0	4.34631432545202e-05	0	0	0	k__Chloroplastida;p__Streptophyta;c__Liliopsida;o__Magnoliophyta;f__unidentified;g__unidentified;s__Musa_environmental_sample
OTU_661	4.34631432545202e-05	0	0	0	0	0	0	0	0	0	0	0	4.34631432545202e-05	0	0	0	2.17315716272601e-05	0	0	0	0	0	8.69262865090403e-05	0.000782336578581363	6.51947148817803e-05	2.17315716272601e-05	0	0	0	0	0	0	0	0	0	0	k__Fungi;p__Ascomycota;c__Lecanoromycetes
OTU_662	6.51947148817803e-05	0	0	0	0	0	0.000608484005563282	0	0.00204276773296245	0	0	0	0	0	0	0	0	0	0	0	0	4.34631432545202e-05	0	0	0	0	0	0	0	0	0	4.34631432545202e-05	0	0	0.000130389429763561	0	k__Animalia;p__Nematoda;c__Chromadorea;o__unidentified;f__Monhysteridae;g__unidentified;s__unidentified
OTU_663	0.000630215577190542	0.000738873435326843	0.000391168289290681	0.000347705146036161	0.00130389429763561	0.000977920723226704	0.00113004172461752	0.000239047287899861	0.000173852573018081	0.000282510431154381	0.000217315716272601	0.000391168289290681	0.000391168289290681	0.000260778859527121	0.000239047287899861	8.69262865090403e-05	0.000391168289290681	8.69262865090403e-05	0	0.000195584144645341	0.000565020862308762	0.000804068150208623	0.000586752433936022	0.000565020862308762	0.000565020862308762	0.000890994436717663	0.000478094575799722	0.000999652294853964	0.00104311543810848	0.000152121001390821	0.000325973574408901	0.000478094575799722	0.00210796244784423	0.000412899860917942	0.00180372044506259	0.0011952364394993	k__Chloroplastida;p__Chlorophyta;c__Trebouxiophyceae;o__unidentified;f__unidentified;g__Heveochlorella;s__Heveochlorella_hainangensis
OTU_664	0	0	0	0.0001086578581363	0	0	0	0	0	0	2.17315716272601e-05	0	0	0	0	0.0001086578581363	0	0	0	0	2.17315716272601e-05	2.17315716272601e-05	0	6.51947148817803e-05	6.51947148817803e-05	2.17315716272601e-05	0.000412899860917942	0	0	0	0	0.000195584144645341	0	0	0	0	k__Fungi;p__Ascomycota;c__Saccharomycetes;o__Saccharomycetales;f__Dipodascaceae;g__Geotrichum;s__Geotrichum_fermentans
OTU_665	0	0	0	0	0	4.34631432545202e-05	0	2.17315716272601e-05	0	2.17315716272601e-05	0	0	0	2.17315716272601e-05	0	0	0	0	4.34631432545202e-05	0	4.34631432545202e-05	8.69262865090403e-05	2.17315716272601e-05	8.69262865090403e-05	0	2.17315716272601e-05	6.51947148817803e-05	0	0	0	0	0	2.17315716272601e-05	2.17315716272601e-05	0	0	k__Fungi;p__Basidiomycota;c__Agaricomycetes;o__Agaricales
OTU_666	0	0	0.000760605006954103	0	0	0	0	4.34631432545202e-05	0	0	0	8.69262865090403e-05	0	0	2.17315716272601e-05	0	0	0	2.17315716272601e-05	8.69262865090403e-05	4.34631432545202e-05	4.34631432545202e-05	0	0	0	0	0	0	0	0	0	0	0	0	0	0	k__Animalia;p__Nematoda;c__Chromadorea;o__unidentified;f__Rhabditidae;g__unidentified;s__Acrostichus_sp._RGD193
OTU_667	0	6.51947148817803e-05	0	0	0	0	0	0	0	0	0	0	0	0.0001086578581363	0	0	0	0	0	0	2.17315716272601e-05	0	4.34631432545202e-05	2.17315716272601e-05	0.000738873435326843	2.17315716272601e-05	4.34631432545202e-05	0	0	6.51947148817803e-05	0	0	0	0	0	0	k__Fungi;p__Ascomycota
OTU_668	4.34631432545202e-05	0	0	2.17315716272601e-05	4.34631432545202e-05	0	0	0	0.00139082058414465	0	0	4.34631432545202e-05	4.34631432545202e-05	2.17315716272601e-05	2.17315716272601e-05	0	4.34631432545202e-05	0	0	4.34631432545202e-05	0	0	0	0	4.34631432545202e-05	0	0	0	0	0	0	0	0	0	0	0	k__Stramenopiles;p__Xanthophyceae;c__unidentified;o__Mischococcales;f__unidentified;g__Botrydiopsis;s__Botrydiopsis_pyrenoidosa
OTU_669	0	4.34631432545202e-05	0	4.34631432545202e-05	4.34631432545202e-05	0	0	0	0	0	0	6.51947148817803e-05	2.17315716272601e-05	4.34631432545202e-05	2.17315716272601e-05	0	0	4.34631432545202e-05	2.17315716272601e-05	0	4.34631432545202e-05	0.000152121001390821	0.000391168289290681	0	0.000434631432545202	0.0001086578581363	4.34631432545202e-05	0	0	0	0	0	2.17315716272601e-05	0	0	0	k__Fungi;p__Ascomycota;c__Dothideomycetes;o__Dothideales;f__unidentified;g__Heleiosa;s__Heleiosa_barbatula
OTU_670	0	2.17315716272601e-05	6.51947148817803e-05	2.17315716272601e-05	0	0	0	0	0	0	0.000391168289290681	0.000239047287899861	2.17315716272601e-05	6.51947148817803e-05	2.17315716272601e-05	8.69262865090403e-05	4.34631432545202e-05	2.17315716272601e-05	0	0	0	6.51947148817803e-05	4.34631432545202e-05	0	0	4.34631432545202e-05	0	0.000152121001390821	2.17315716272601e-05	0	2.17315716272601e-05	0	0	0	0.000434631432545202	0	k__Rhizaria;p__Cercozoa
OTU_671	0.0001086578581363	0.000130389429763561	0.000217315716272601	0	0	4.34631432545202e-05	4.34631432545202e-05	0	0	0	0	0.000152121001390821	0.000499826147426982	0	2.17315716272601e-05	4.34631432545202e-05	0	0	0	4.34631432545202e-05	0	4.34631432545202e-05	8.69262865090403e-05	4.34631432545202e-05	2.17315716272601e-05	6.51947148817803e-05	0	0.000325973574408901	0.000478094575799722	2.17315716272601e-05	0.000173852573018081	0	0	6.51947148817803e-05	0.000195584144645341	0	k__Chloroplastida;p__Chlorophyta;c__Ulvophyceae;o__unidentified;f__unidentified
OTU_672	6.51947148817803e-05	0	8.69262865090403e-05	6.51947148817803e-05	8.69262865090403e-05	4.34631432545202e-05	8.69262865090403e-05	0	0	0	0	4.34631432545202e-05	2.17315716272601e-05	0	2.17315716272601e-05	4.34631432545202e-05	2.17315716272601e-05	0	0	0	4.34631432545202e-05	2.17315716272601e-05	0	4.34631432545202e-05	8.69262865090403e-05	6.51947148817803e-05	6.51947148817803e-05	0	0.000130389429763561	0	6.51947148817803e-05	4.34631432545202e-05	4.34631432545202e-05	0	0	0	k__Fungi;p__Ascomycota;c__Sordariomycetes;o__Sordariales;f__Chaetosphaeriaceae;g__Kionochaeta;s__Kionochaeta_spissa
OTU_673	0.0001086578581363	0	0	0	0	0	0	0	0	2.17315716272601e-05	0	2.17315716272601e-05	4.34631432545202e-05	0	0	0	0	0	4.34631432545202e-05	0	0.0001086578581363	0.000152121001390821	0	0.000391168289290681	0	2.17315716272601e-05	0	0	0	0	0	0	0	0	0	0	k__Rhizaria;p__Cercozoa;c__unidentified;o__Glissomonadida;f__unidentified;g__Allantion;s__Allantion_sp._CCAP_1906/1
OTU_674	6.51947148817803e-05	0	0	0	0	0	0	0	0	0	0	0.000456363004172462	4.34631432545202e-05	0	0	8.69262865090403e-05	0	0	2.17315716272601e-05	0	0	0	2.17315716272601e-05	0	4.34631432545202e-05	2.17315716272601e-05	0	0	4.34631432545202e-05	0	0	0	2.17315716272601e-05	0	0.000391168289290681	2.17315716272601e-05	k__Chloroplastida;p__Chlorophyta;c__Ulvophyceae;o__unidentified;f__unidentified
OTU_675	8.69262865090403e-05	2.17315716272601e-05	4.34631432545202e-05	4.34631432545202e-05	0.000152121001390821	4.34631432545202e-05	8.69262865090403e-05	0.000217315716272601	0.000651947148817803	0	0	0	2.17315716272601e-05	0	0	4.34631432545202e-05	0	4.34631432545202e-05	2.17315716272601e-05	0.0001086578581363	0	0	0	0	0	0	0	0	2.17315716272601e-05	6.51947148817803e-05	0	2.17315716272601e-05	2.17315716272601e-05	0	4.34631432545202e-05	4.34631432545202e-05	k__Rhizaria;p__Cercozoa
OTU_676	0.000956189151599444	0.000434631432545202	0.001086578581363	0.000804068150208623	0.000717141863699583	0.000912726008344923	0.000608484005563282	0.00152121001390821	0.000239047287899861	0.00234700973574409	0.000630215577190542	0.00139082058414465	0.00126043115438108	0.00176025730180807	0.000934457579972184	0.00121696801112656	0.00182545201668985	0.000478094575799722	0.00230354659248957	0.000608484005563282	0.0181241307371349	0.00445497218358832	0.00180372044506259	0.00210796244784423	0.00210796244784423	0.0045201668984701	0.00178198887343533	0.00173852573018081	0.00258605702364395	0.000369436717663421	0.000869262865090403	0.000651947148817803	0.000673678720445063	0.000391168289290681	0.00262952016689847	0.00269471488178025	k__Fungi;p__Ascomycota;c__Dothideomycetes;o__Pleosporales;f__unidentified
OTU_677	0	0	0	0	0	4.34631432545202e-05	0	0.000304242002781641	0	4.34631432545202e-05	6.51947148817803e-05	0	2.17315716272601e-05	4.34631432545202e-05	0	6.51947148817803e-05	0	0	0.000130389429763561	0	0	2.17315716272601e-05	0	0	2.17315716272601e-05	0	0	6.51947148817803e-05	4.34631432545202e-05	0	2.17315716272601e-05	2.17315716272601e-05	0	6.51947148817803e-05	2.17315716272601e-05	0.000217315716272601	k__Rhizaria;p__Cercozoa
OTU_678	0	0	0	2.17315716272601e-05	0	0	8.69262865090403e-05	0	0	0	0.001086578581363	0	4.34631432545202e-05	0.000173852573018081	2.17315716272601e-05	6.51947148817803e-05	4.34631432545202e-05	0	0	2.17315716272601e-05	0	2.17315716272601e-05	8.69262865090403e-05	2.17315716272601e-05	0.000282510431154381	4.34631432545202e-05	0	0	0	0	0	2.17315716272601e-05	2.17315716272601e-05	0	0	0	k__Amoebozoa;p__Tubulinea;c__Euamoebida;o__unidentified;f__unidentified;g__Hartmannella;s__Vermamoeba_vermiformis
OTU_680	4.34631432545202e-05	0	2.17315716272601e-05	0	6.51947148817803e-05	0.000456363004172462	0.0001086578581363	8.69262865090403e-05	0	0	4.34631432545202e-05	0	0	0	0	0	0	4.34631432545202e-05	0	0	2.17315716272601e-05	0	0	0	0	0	0	0	0	0	0	0	0	0.000130389429763561	0	0	k__Fungi;p__unidentified;c__unidentified;o__Mucorales;f__unidentified;g__Phycomyces;s__Phycomyces_blakesleeanus
OTU_681	0.000217315716272601	4.34631432545202e-05	0	2.17315716272601e-05	0	4.34631432545202e-05	0	0.000608484005563282	2.17315716272601e-05	0	2.17315716272601e-05	4.34631432545202e-05	4.34631432545202e-05	0	0	0	0	0	0	0	0	0	4.34631432545202e-05	0	0	0	0	0	0	0	0	0	0	0	0	0	k__Chloroplastida;p__Streptophyta;c__Embryophyta;o__Bryales;f__unidentified
OTU_684	2.17315716272601e-05	0	0	2.17315716272601e-05	2.17315716272601e-05	6.51947148817803e-05	2.17315716272601e-05	4.34631432545202e-05	0	0	6.51947148817803e-05	0.000239047287899861	0	6.51947148817803e-05	2.17315716272601e-05	4.34631432545202e-05	6.51947148817803e-05	0	2.17315716272601e-05	2.17315716272601e-05	0	0.000130389429763561	6.51947148817803e-05	0	0	6.51947148817803e-05	0	6.51947148817803e-05	0	0	0	0	0	0	8.69262865090403e-05	6.51947148817803e-05	k__Chloroplastida;p__Chlorophyta;c__Trebouxiophyceae;o__unidentified;f__unidentified
OTU_685	0	0	0	0	0	0	2.17315716272601e-05	0	0	0	4.34631432545202e-05	6.51947148817803e-05	0	0	0	0	0	4.34631432545202e-05	0	0	8.69262865090403e-05	0.000130389429763561	0.000239047287899861	6.51947148817803e-05	8.69262865090403e-05	8.69262865090403e-05	0.000130389429763561	0.0001086578581363	0	0	0	0	0	0	0	0	k__Fungi;p__Chytridiomycota;c__unidentified;o__unidentified;f__unidentified;g__Olpidium;s__uncultured_fungus
OTU_686	0.0001086578581363	0.000152121001390821	8.69262865090403e-05	0.0001086578581363	0	0.000130389429763561	0.0001086578581363	6.51947148817803e-05	0.000130389429763561	0.000152121001390821	0	0	0	0	0	0	0	0	0	0	0.000282510431154381	2.17315716272601e-05	0.000130389429763561	0	6.51947148817803e-05	0	0.000782336578581363	0	0	0	0	0	0	0	0	4.34631432545202e-05	k__Rhizaria;p__Cercozoa;c__Imbricatea;o__Euglyphida;f__Trinematidae;g__Trinema;s__Trinema_lineare
OTU_687	2.17315716272601e-05	0	0	0	0	4.34631432545202e-05	0	4.34631432545202e-05	2.17315716272601e-05	0	0	0	4.34631432545202e-05	2.17315716272601e-05	0	2.17315716272601e-05	2.17315716272601e-05	4.34631432545202e-05	0	0	0.000152121001390821	0.000499826147426982	0.000152121001390821	0.000825799721835883	0.000478094575799722	0.000282510431154381	6.51947148817803e-05	0	2.17315716272601e-05	2.17315716272601e-05	4.34631432545202e-05	8.69262865090403e-05	4.34631432545202e-05	2.17315716272601e-05	0	0	k__Fungi;p__Ascomycota;c__Sordariomycetes;o__Hypocreales
[truncated: 561 more rows]
